# Supplementary material
Source: PubMed Central journal article supplement (PMC6643702)
Supplement: ao7b00095_si_001.pdf [file ao7b00095_si_001.pdf]

# **Studies Towards the Synthesis of Smenamide A, an Antiproliferative Metabolite from *Smenospongia aurea*. Total synthesis of *ent*-Smenamide A and 16-*epi*-Smenamide A**

**Alessia Caso,<sup>§</sup> Alfonso Mangoni,<sup>§</sup> Gennaro Piccialli<sup>§</sup>,**

**Valeria Costantino\*<sup>§</sup>, Vincenzo Piccialli\*<sup>†</sup>**

§. Department of Pharmacy, University of Naples Federico II, 80131 Napoli, Italy.

†. Department of Chemical Sciences, University of Naples Federico II, via Cintia 4, 80126, Naples, Italy.

## **Table of contents**

### **Determination of the absolute coinfiguration at C-8 of smenamide A**

**using Marfey's method** **S2**

**Comparison of NMR spectra of natural smenamide A and *ent*-smenamide A** **S4**

**Spectra** **S5**

## Determination of the absolute configuration at C-8 of smenamide A using Marfey's method.

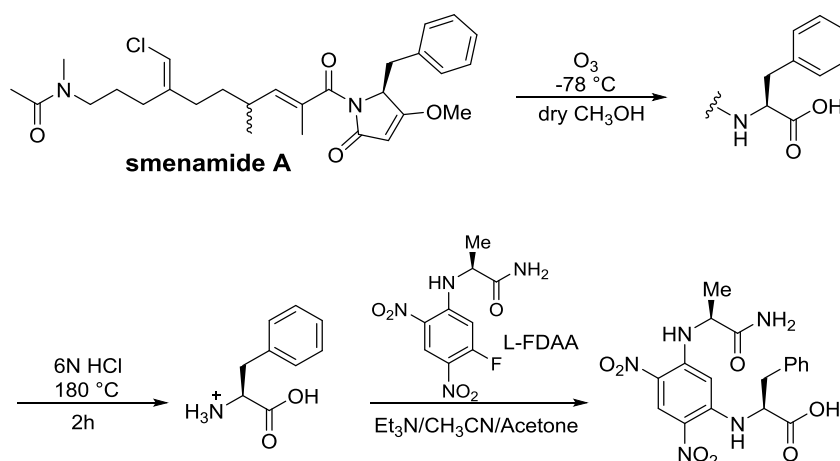

**Figure S1.** Ozonolysis, hydrolysis and derivatization of smenamide A with L-enantiomer of Marfey's reagent.

A small amount of smenamide A (5  $\mu\text{g}$ ) was suspended in ozone-saturated MeOH (300  $\mu\text{L}$ ) at -78 °C for 5 min (figure S1). The sample was dried under a  $\text{N}_2$  stream to remove ozone, then treated with 6N HCl and heated in a sealed glass tube at 180 °C for 2 h. The residual HCl fumes were removed in vacuo. The hydrolysate was dissolved in  $\text{Et}_3\text{N}$ /acetone (2:3, 100  $\mu\text{L}$ ) and the solution was treated with 100  $\mu\text{L}$  of 1% 1-fluoro-2,4-dinitrophenyl-5-L-alaninamide (L-FDAA) in  $\text{CH}_3\text{CN}$ /acetone (1:2). The vial was heated at 50 °C for 1 h. The mixture was dried, and the resulting L-FDAA-Phe derivative was redissolved in  $\text{CH}_3\text{CN}/\text{H}_2\text{O}$  (5:95, 500  $\mu\text{L}$ ) for LC-MS analysis. An authentic L-Phe standard was treated with l-FDAA and d-FDAA as described above to give, respectively, the L-FDAA-L-Phe and D-FDAA-L-Phe standards used in the subsequent LC-MS analysis.

Marfey's derivatives were analyzed by LC-HRESIMS. A 5  $\mu\text{m}$  Kinetex C18 column (50  $\times$  2.10 mm), maintained at 25 °C, was eluted at 200  $\mu\text{L min}^{-1}$  with  $\text{H}_2\text{O}$  and  $\text{CH}_3\text{CN}$ , using a gradient elution. The gradient program was as follows: 5%  $\text{CH}_3\text{CN}$  3 min, 5-60%  $\text{CH}_3\text{CN}$  over 20 min, 90%  $\text{CH}_3\text{CN}$  5 min. Mass spectra were acquired in positive ion detection mode and the data were analyzed using the suite of programs Xcalibur. The retention times of L-FDAA-L-Phe and D-FDAA-L-Phe standards were determined as 17.32

min and 18.60 min, respectively, on the basis of the extracted-ion chromatograms at  $m/z$  418.1357. The retention time, measured in the same way for the L-FDAA-Phe sample obtained from smenamamide A, was 17.36 min, and was indicative of the L configuration of Phe residue in smenamamide A (figure S2).

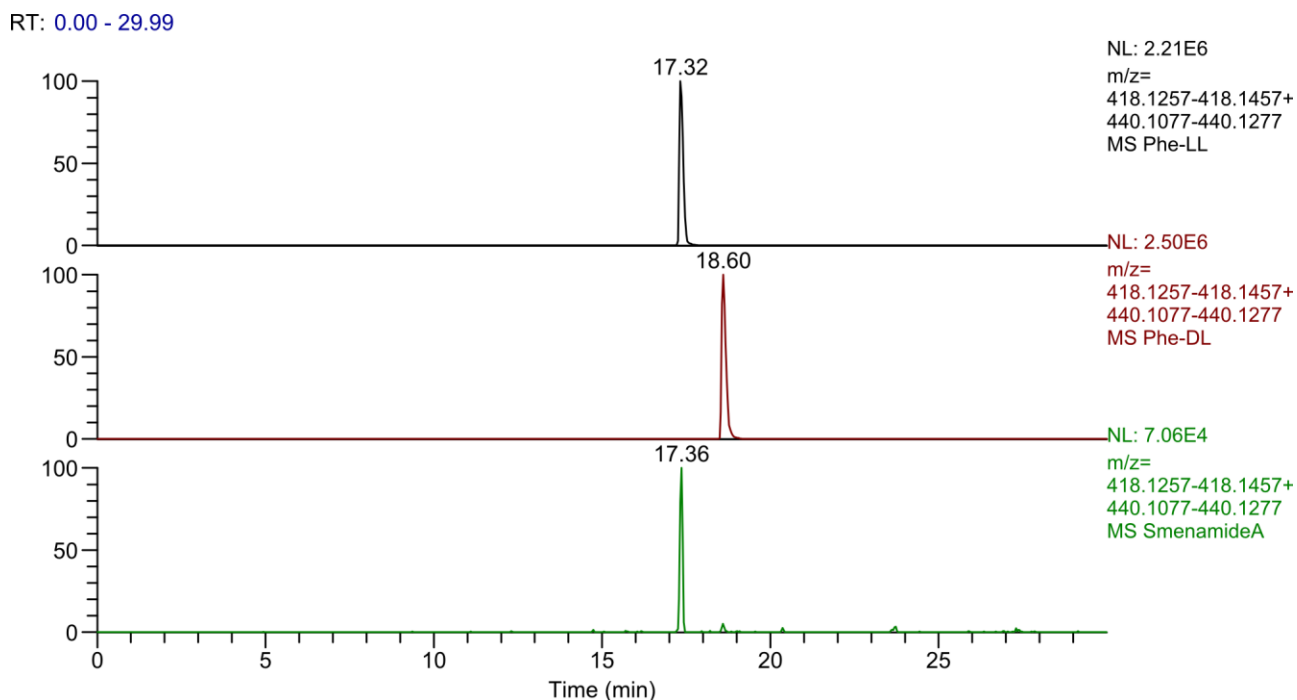

**Figure S2.** HR-ESI-MS-HPLC analysis of Marfey's derivative from smenamamide A. Extracted-ion chromatograms at  $m/z$  418.1357 of authentic 1-fluoro-2,4-dinitrophenyl-5-alanine amide L-phenylalanine (L-FDAA-L-Phe), authentic D-FDAA-L-Phe and L-FDAA-Phe from smenamamide A.

**Table S1.** NMR data of natural smenamamide A (**1**) and *ent*-smenamamide A (**29**) (700 MHz, CD<sub>3</sub>OD).

| smenamamide A |                                            |                             |                                            |                             | <i>ent</i> -smenamamide A |                                            |                             |                                            |                             |            |                         |
|---------------|--------------------------------------------|-----------------------------|--------------------------------------------|-----------------------------|---------------------------|--------------------------------------------|-----------------------------|--------------------------------------------|-----------------------------|------------|-------------------------|
| Position      | Z-Conformer                                |                             | E-Conformer                                |                             | Position                  | Z-Conformer                                |                             | E-Conformer                                |                             |            |                         |
|               | $\delta_{\text{H}}$ [Mult., <i>J</i> (Hz)] | $\delta_{\text{C}}$ [Mult.] | $\delta_{\text{H}}$ [Mult., <i>J</i> (Hz)] | $\delta_{\text{C}}$ [Mult.] |                           | $\delta_{\text{H}}$ [Mult., <i>J</i> (Hz)] | $\delta_{\text{C}}$ [Mult.] | $\delta_{\text{H}}$ [Mult., <i>J</i> (Hz)] | $\delta_{\text{C}}$ [Mult.] |            |                         |
| 1             | –                                          | 135.6 (C)                   | –                                          | 135.6 (C)                   | 1                         | –                                          | 135.7 (C)                   | –                                          | 135.7 (C)                   |            |                         |
| 2/6           | 6.99 (m)                                   | 130.8 (CH)                  | 6.99 (m)                                   | 130.8 (CH)                  | 2/6                       | 6.90 (m)                                   | 130.9 (CH)                  | 6.90 (m)                                   | 130.9 (CH)                  |            |                         |
| 3/5           | 7.23 (ovl)                                 | 129.4 (CH)                  | 7.23 (ovl)                                 | 129.4 (CH)                  | 3/5                       | 7.23 (ovl)                                 | 129.3 (CH)                  | 7.23 (ovl)                                 | 129.3 (CH)                  |            |                         |
| 4             | 7.23 (ovl)                                 | 128.3 (CH)                  | 7.23 (ovl)                                 | 128.3 (CH)                  | 4                         | 7.23 (ovl)                                 | 128.2 (CH)                  | 7.23 (ovl)                                 | 128.2 (CH)                  |            |                         |
| 7             | a                                          | 3.37 (ovl)                  | 34.8 (CH <sub>2</sub> )                    | 3.37 (ovl)                  | 34.8 (CH <sub>2</sub> )   | 7                                          | a                           | 3.36 (ovl)                                 | 34.7 (CH <sub>2</sub> )     | 3.36 (ovl) | 34.7 (CH <sub>2</sub> ) |
|               | b                                          | 3.19 (m)                    |                                            | 3.19 (m)                    |                           |                                            | b                           | 3.20 (m)                                   |                             | 3.20 (m)   |                         |
| 8             | 5.02 (ovl)                                 | 60.5 (CH)                   | 5.02 (ovl)                                 | 60.5 (CH)                   | 8                         | 5.02 (ovl)                                 | 60.5 (CH)                   | 5.02 (ovl)                                 | 60.5 (CH)                   |            |                         |
| 9             | –                                          | 179.5 (C)                   | –                                          | 179.5 (C)                   | 9                         | –                                          | 179.8 (C)                   | –                                          | 179.8 (C)                   |            |                         |
| 10            | 5.04 (br. s)                               | 95.5 (CH)                   | 5.02 (br. s)                               | 95.5 (CH)                   | 10                        | 5.04 (br. s)                               | 95.5 (CH)                   | 5.02 (br. s)                               | 95.5 (CH)                   |            |                         |
| 11            | –                                          | 170.7 (C)                   | –                                          | 170.7 (C)                   | 11                        | –                                          | 171.1 (C)                   | –                                          | 171.1 (C)                   |            |                         |
| 12            | –                                          | 172.3 (C)                   | –                                          | 172.2 (C)                   | 12                        | –                                          | 172.7 (C)                   | –                                          | 172.7 (C)                   |            |                         |
| 13            | –                                          | 132.1 (C)                   | –                                          | 132.1 (C)                   | 13                        | –                                          | 132.1 (C)                   | –                                          | 132.1 (C)                   |            |                         |
| 14            | 1.77 (d, 1.5)                              | 13.7 (CH <sub>3</sub> )     | 1.78 (d, 1.5)                              | 13.7 (CH <sub>3</sub> )     | 14                        | 1.77 (d, 1.4)                              | 13.7 (CH <sub>3</sub> )     | 1.78 (d, 1.4)                              | 13.7 (CH <sub>3</sub> )     |            |                         |
| 15            | 5.36 (br. d, 10.2)                         | 144.1 (CH)                  | 5.36 (br. d, 10.2)                         | 144.1 (CH)                  | 15                        | 5.36 (br. d, 10.1)                         | 144.1 (CH)                  | 5.36 (br. d, 10.1)                         | 144.1 (CH)                  |            |                         |
| 16            | 2.45 (m)                                   | 33.4 (CH)                   | 2.48 (m)                                   | 33.4 (CH)                   | 16                        | 2.45 (m)                                   | 33.4 (CH)                   | 2.48 (m)                                   | 33.5 (CH)                   |            |                         |
| 17            | 0.98 (d, 6.5)                              | 20.4 (CH <sub>3</sub> )     | 1.00 (d, 6.5)                              | 20.6 (CH <sub>3</sub> )     | 17                        | 0.98 (d, 6.5)                              | 20.6 (CH <sub>3</sub> )     | 1.00 (d, 6.5)                              | 20.7 (CH <sub>3</sub> )     |            |                         |
| 18            | a                                          | 1.51 (ovl)                  | 36.1 (CH <sub>2</sub> )                    | 1.52 (ovl)                  | 35.9 (CH <sub>2</sub> )   | 18                                         | a                           | 1.51 (ovl)                                 | 36.4 (CH <sub>2</sub> )     | 1.51 (ovl) | 36.2 (CH <sub>2</sub> ) |
|               | b                                          | 1.28 (ovl)                  |                                            | 1.30 (ovl)                  |                           |                                            | b                           | 1.29 (ovl)                                 |                             | 1.29 (ovl) |                         |
| 19            | a                                          | 2.19 (ovl)                  | 33.2 (CH <sub>2</sub> )                    | 2.23 (ovl)                  | 33.2 (CH <sub>2</sub> )   | 19                                         | a                           | 2.19 (ovl)                                 | 33.2 (CH <sub>2</sub> )     | 2.23 (ovl) | 33.3 (CH <sub>2</sub> ) |
|               | b                                          | 2.06 (ovl)                  |                                            | 2.05 (ovl)                  |                           |                                            | b                           | 2.05 (ovl)                                 |                             | 2.05 (ovl) |                         |
| 20            | –                                          | 143.1 (C)                   | –                                          | 142.8 (C)                   | 20                        | –                                          | 143.4 (C)                   | –                                          | 143.2 (C)                   |            |                         |
| 21            | 5.93 (br. s)                               | 113.9 (CH)                  | 5.97 (br. s)                               | 114.1 (CH)                  | 21                        | 5.92 (br. s)                               | 113.9 (CH)                  | 5.96 (br. s)                               | 114.1 (CH)                  |            |                         |
| 22            | a                                          | 2.22 (m)                    | 28.1 (CH <sub>2</sub> )                    | 2.26 (m)                    | 28.0 (CH <sub>2</sub> )   | 22                                         | a                           | 2.22 (m)                                   | 28.1 (CH <sub>2</sub> )     | 2.26 (m)   | 27.9 (CH <sub>2</sub> ) |
|               | b                                          | 2.15 (m)                    |                                            | 2.18 (m)                    |                           |                                            | b                           | 2.15 (m)                                   |                             | 2.18 (m)   |                         |
| 23            | 1.64 (m)                                   | 25.9 (CH <sub>2</sub> )     | 1.70 (m)                                   | 26.6 (CH <sub>2</sub> )     | 23                        | 1.65 (m)                                   | 25.7 (CH <sub>2</sub> )     | 1.70 (m)                                   | 26.6 (CH <sub>2</sub> )     |            |                         |
| 24            | 3.36 (ovl)                                 | 48.6 (CH <sub>2</sub> )     | 3.33 (ovl)                                 | 51.5 (CH <sub>2</sub> )     | 24                        | 3.36 (ovl)                                 | 48.4 (CH <sub>2</sub> )     | 3.34 (ovl)                                 | 51.6 (CH <sub>2</sub> )     |            |                         |
| 25            | –                                          | 172.9 (C)                   | –                                          | 172.7 (C)                   | 25                        | –                                          | 172.7 (C)                   | –                                          | 172.7 (C)                   |            |                         |
| 26            | 2.08 (s)                                   | 21.7 (CH <sub>3</sub> )     | 2.07 (s)                                   | 21.1 (CH <sub>3</sub> )     | 26                        | 2.08 (s)                                   | 21.7 (CH <sub>3</sub> )     | 2.07 (s)                                   | 21.0 (CH <sub>3</sub> )     |            |                         |
| 27            | 3.03 (s)                                   | 36.6 (CH <sub>3</sub> )     | 2.88 (s)                                   | 33.7 (CH <sub>3</sub> )     | 27                        | 3.03 (s)                                   | 36.6 (CH <sub>3</sub> )     | 2.88 (s)                                   | 33.7 (CH <sub>3</sub> )     |            |                         |
| OMe           | 3.97 (s)                                   | 59.7 (CH <sub>3</sub> )     | 3.97 (s)                                   | 59.7 (CH <sub>3</sub> )     | OMe                       | 3.95 (s)                                   | 59.6 (CH <sub>3</sub> )     | 3.95 (s)                                   | 59.6 (CH <sub>3</sub> )     |            |                         |

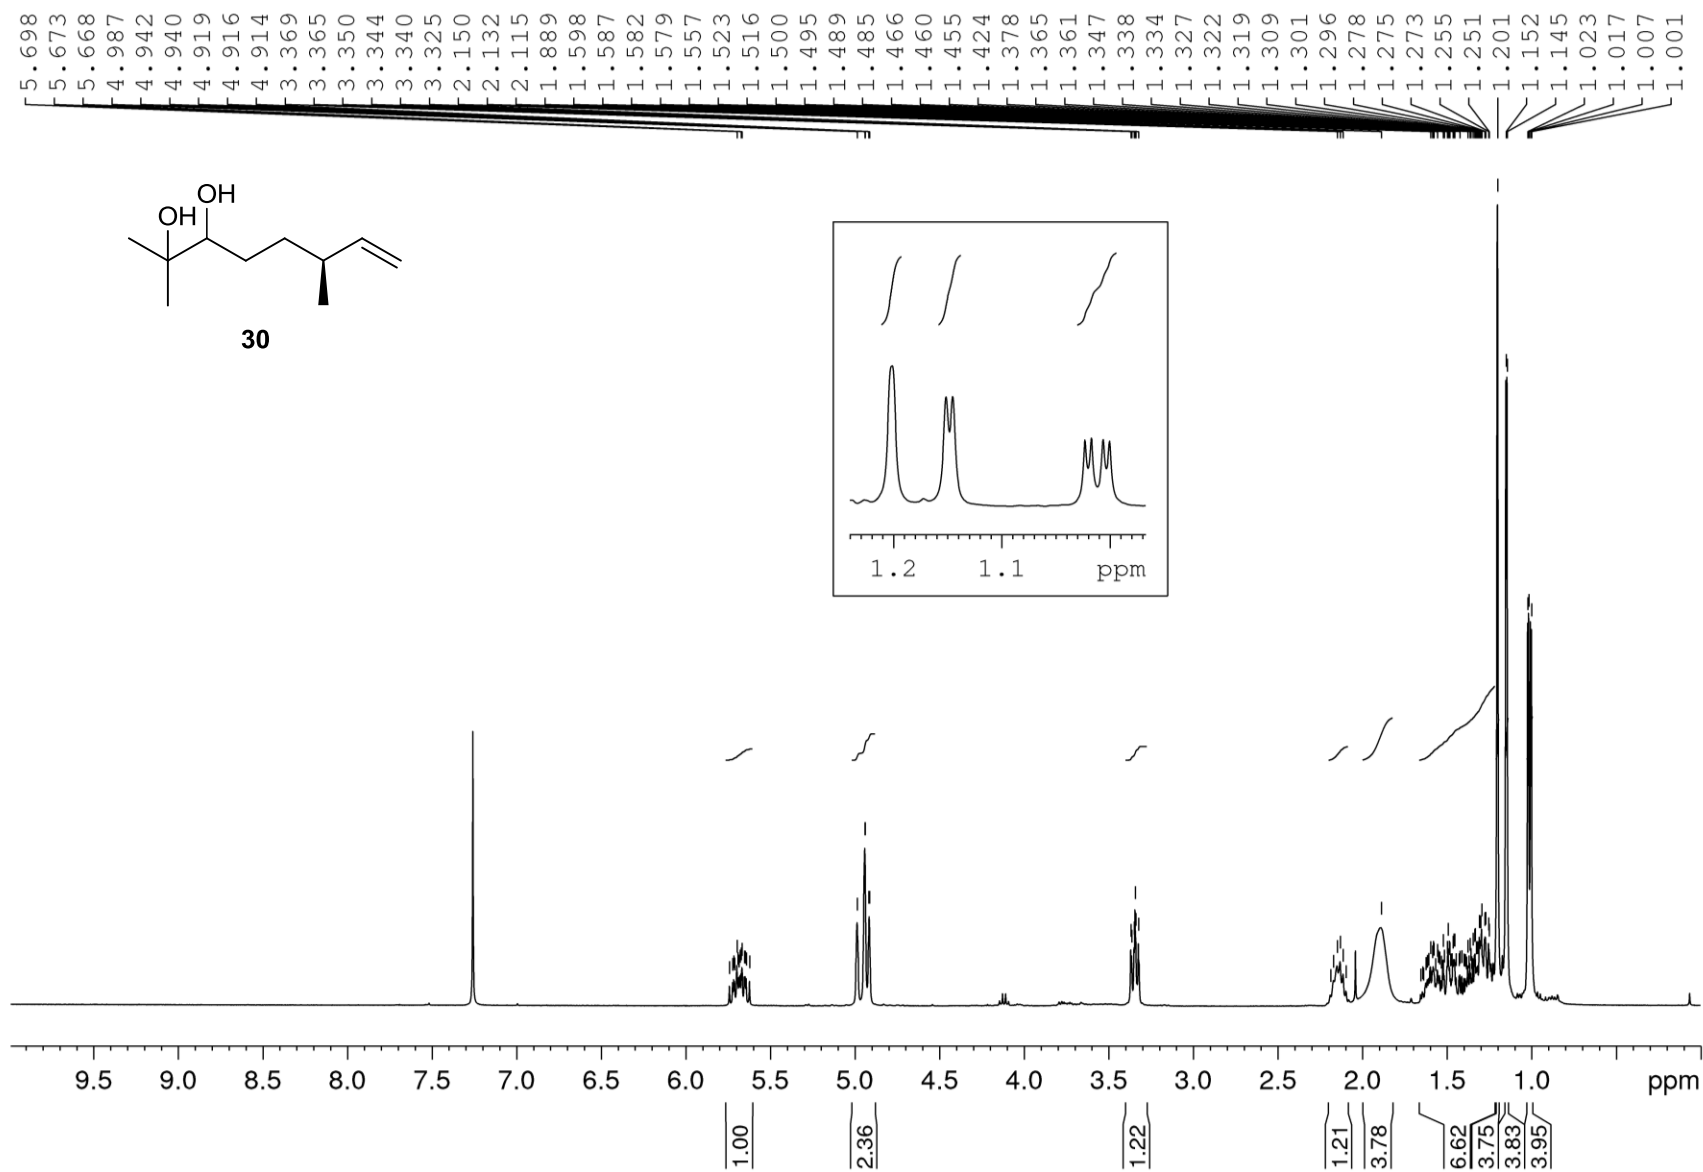

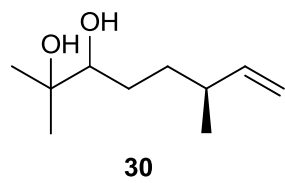

144.525  
144.297

112.976  
112.758

78.893  
78.433  
77.308  
76.994  
76.675  
73.448  
73.290

37.943  
37.722  
33.718  
33.418  
29.403  
29.181  
26.495  
23.043  
20.537  
20.149

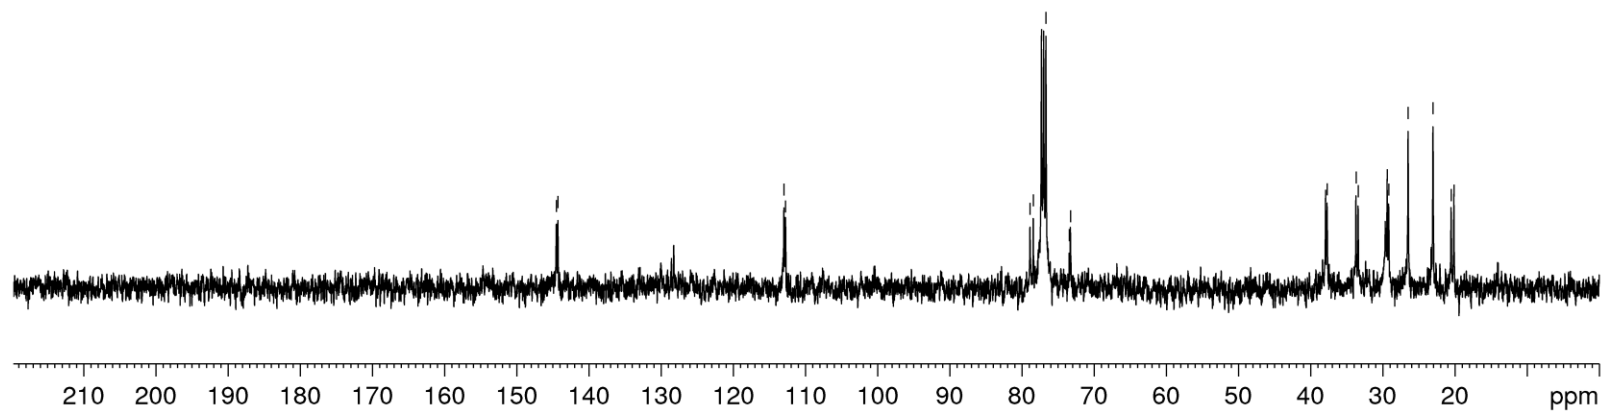

**Figure S4.**  $^{13}\text{C}$  NMR spectrum of compound **30** ( $\text{CDCl}_3$ , 100 MHz)

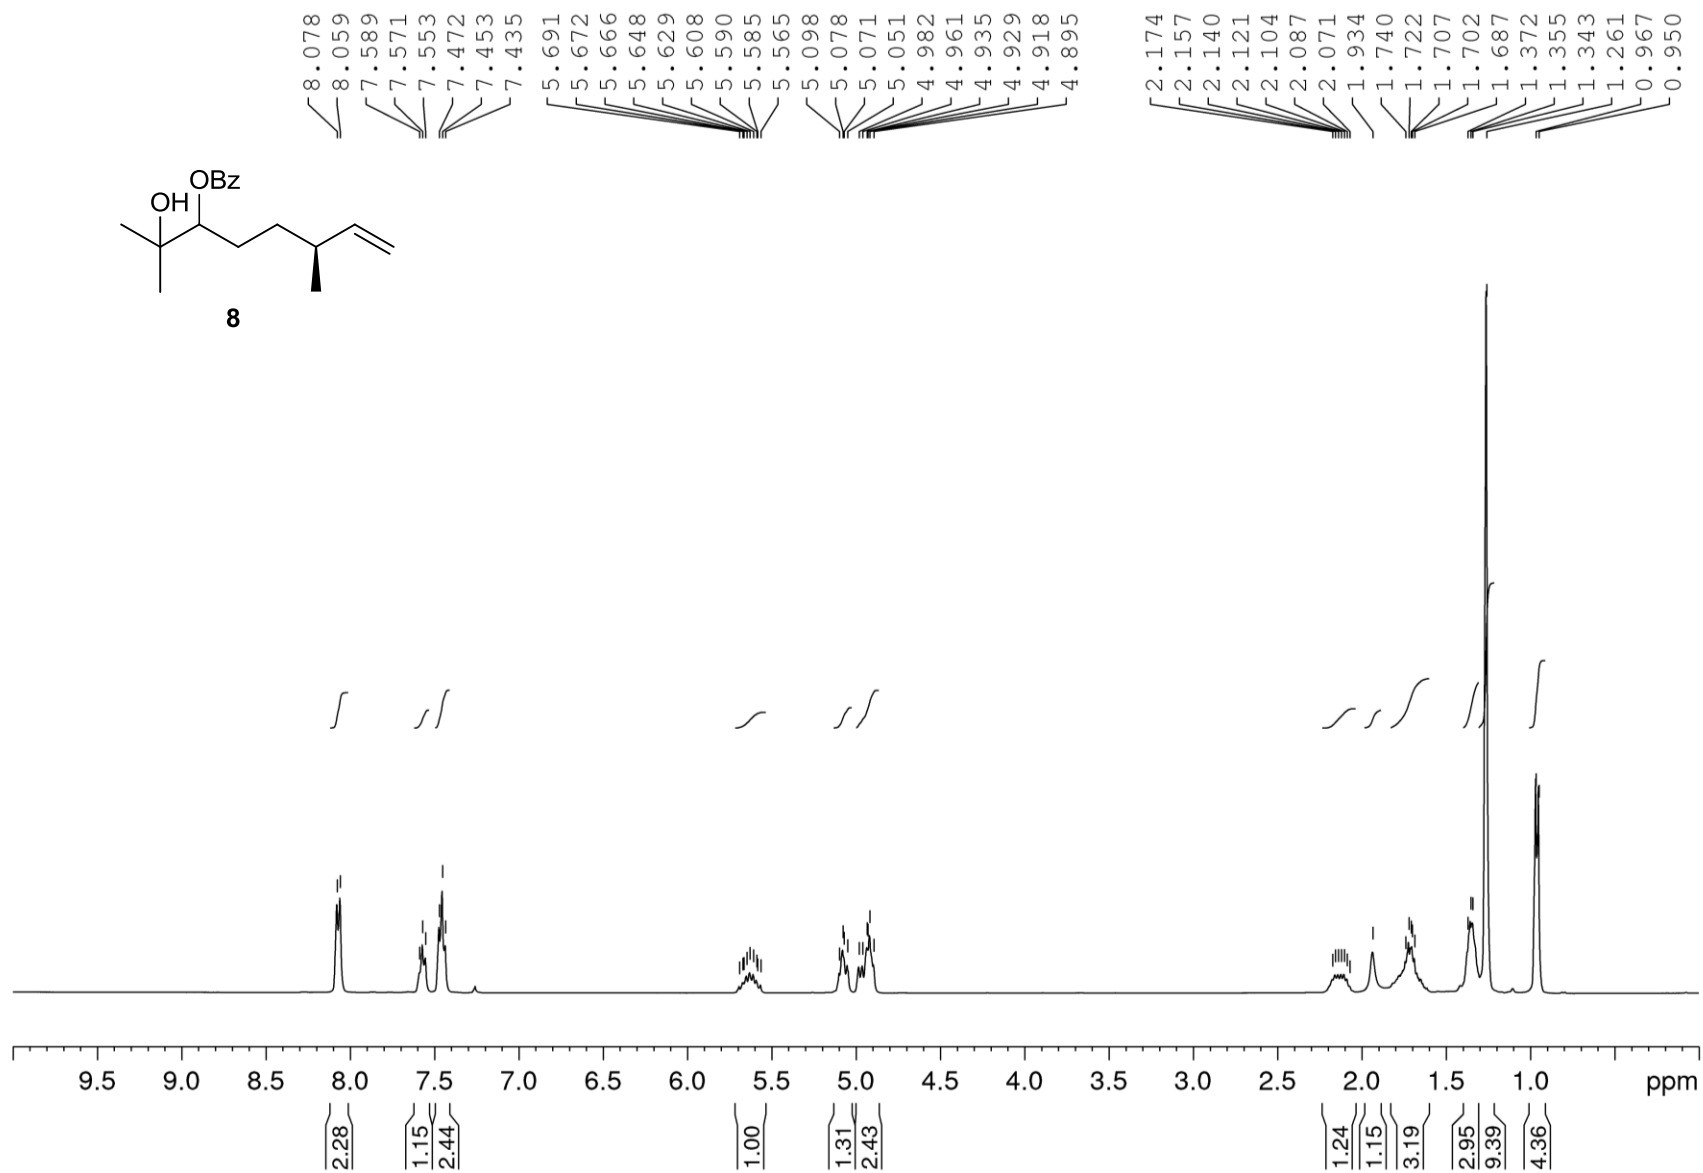

**Figure S5.**  $^1\text{H}$  NMR spectrum of compound **8** ( $\text{CDCl}_3$ , 400 MHz)

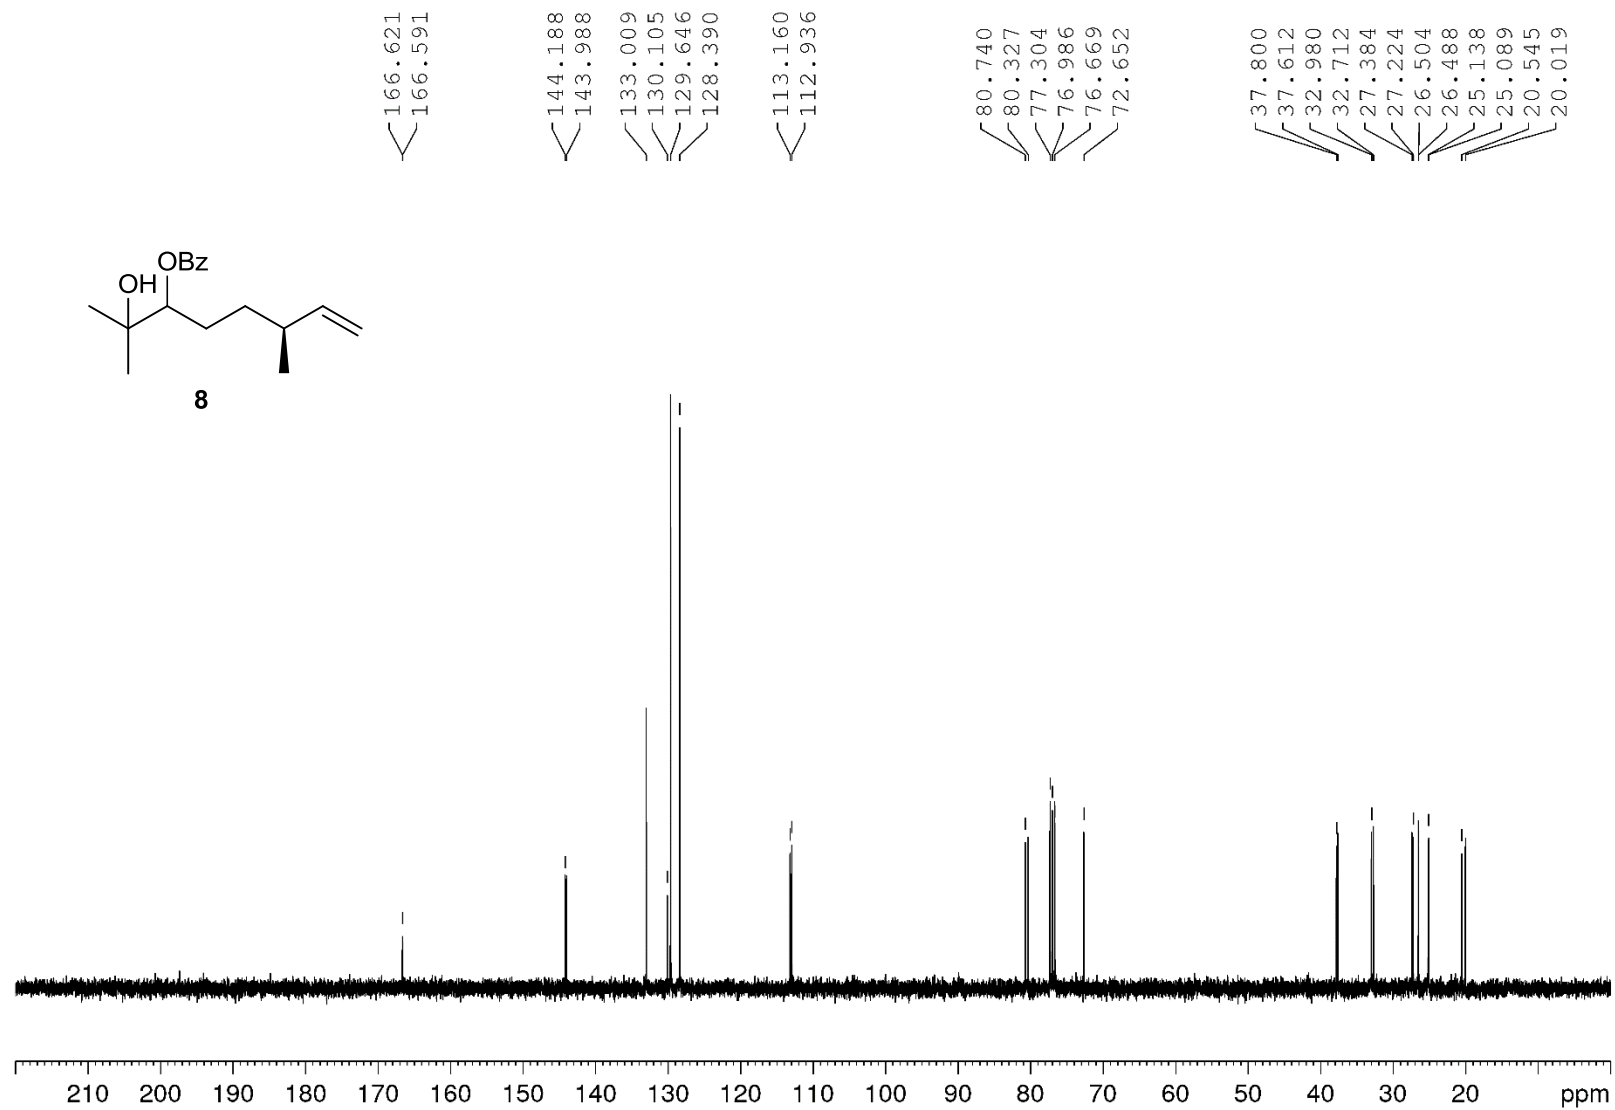

**Figure S6.**  $^{13}\text{C}$  NMR spectrum of compound **8** (CDCl<sub>3</sub>, 100 MHz)



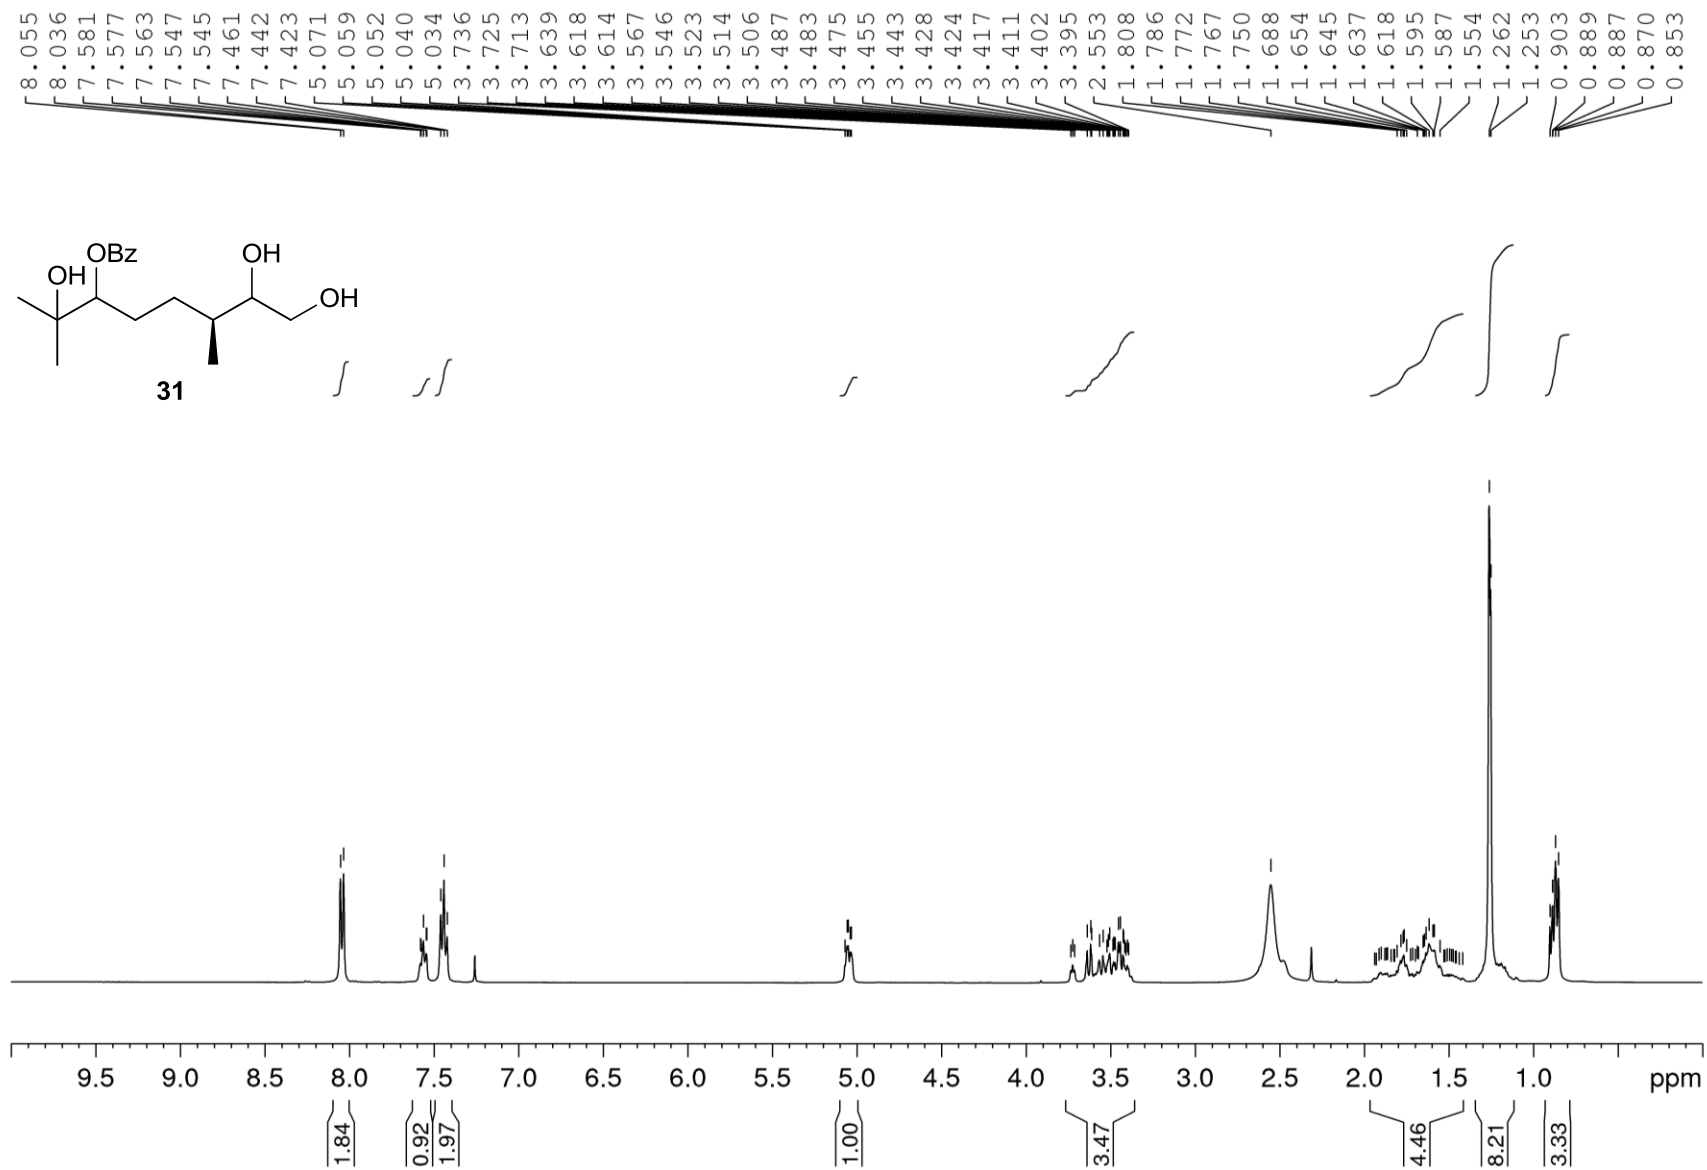

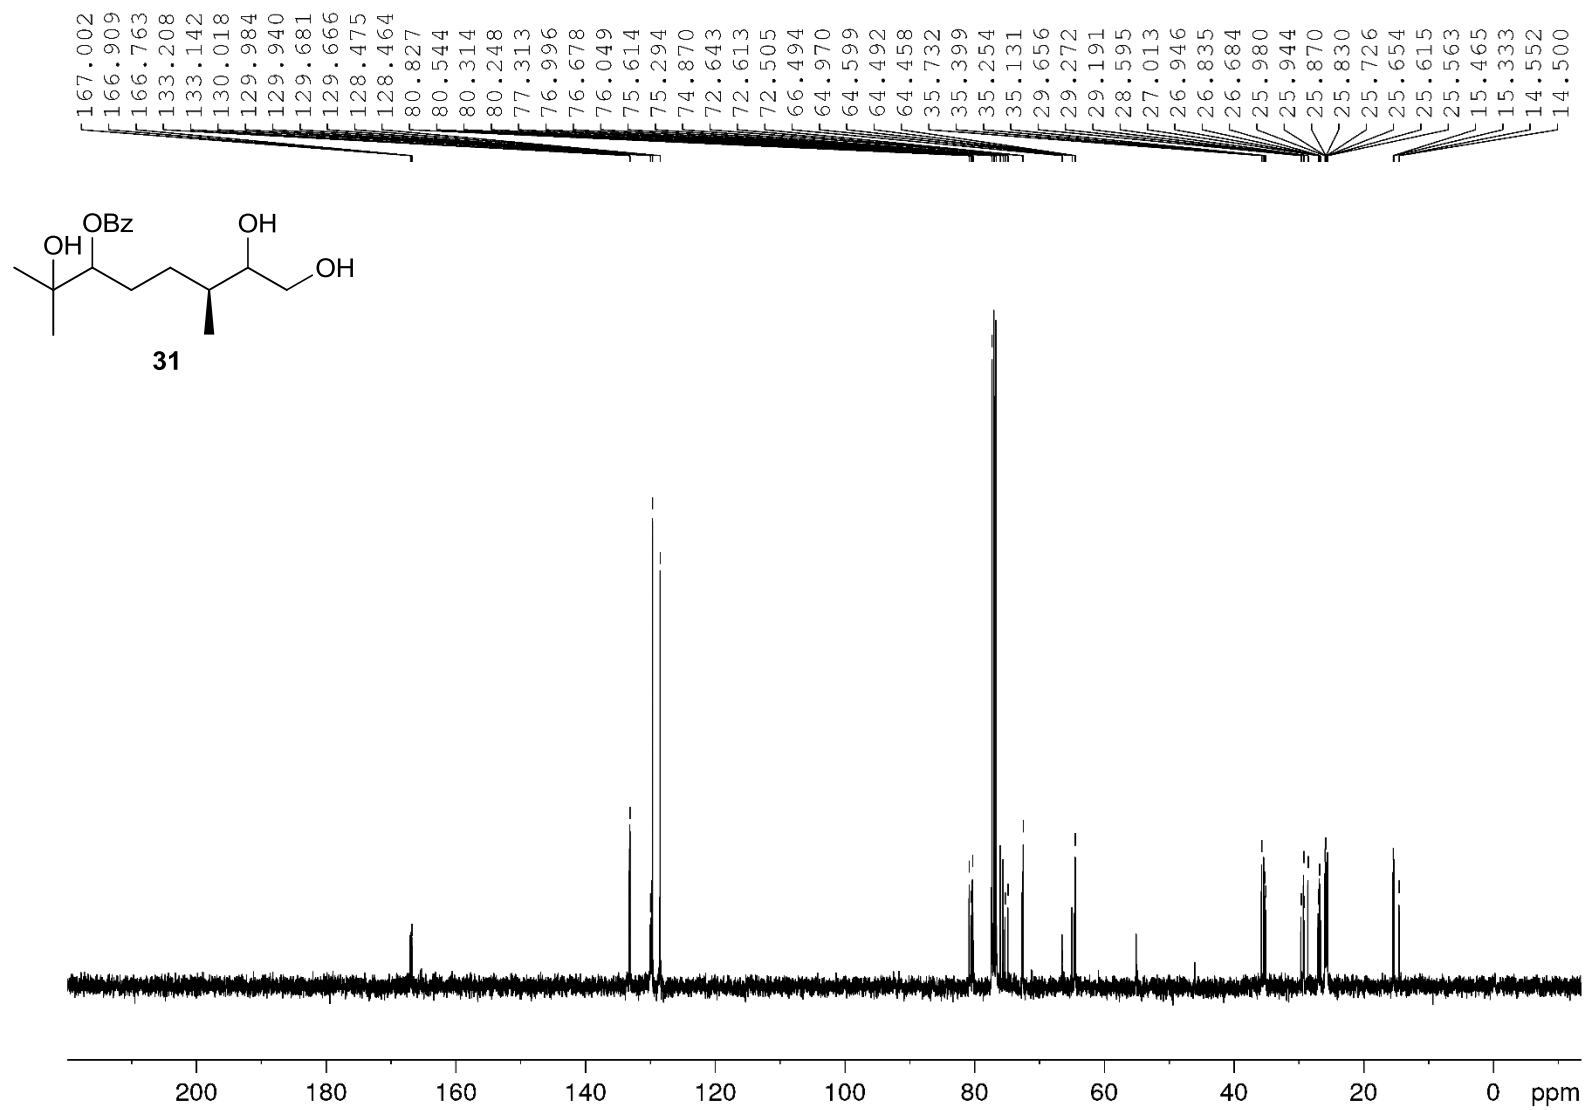

**Figure S8.** <sup>13</sup>C NMR spectrum of compound **31** (CDCl<sub>3</sub>, 100 MHz)

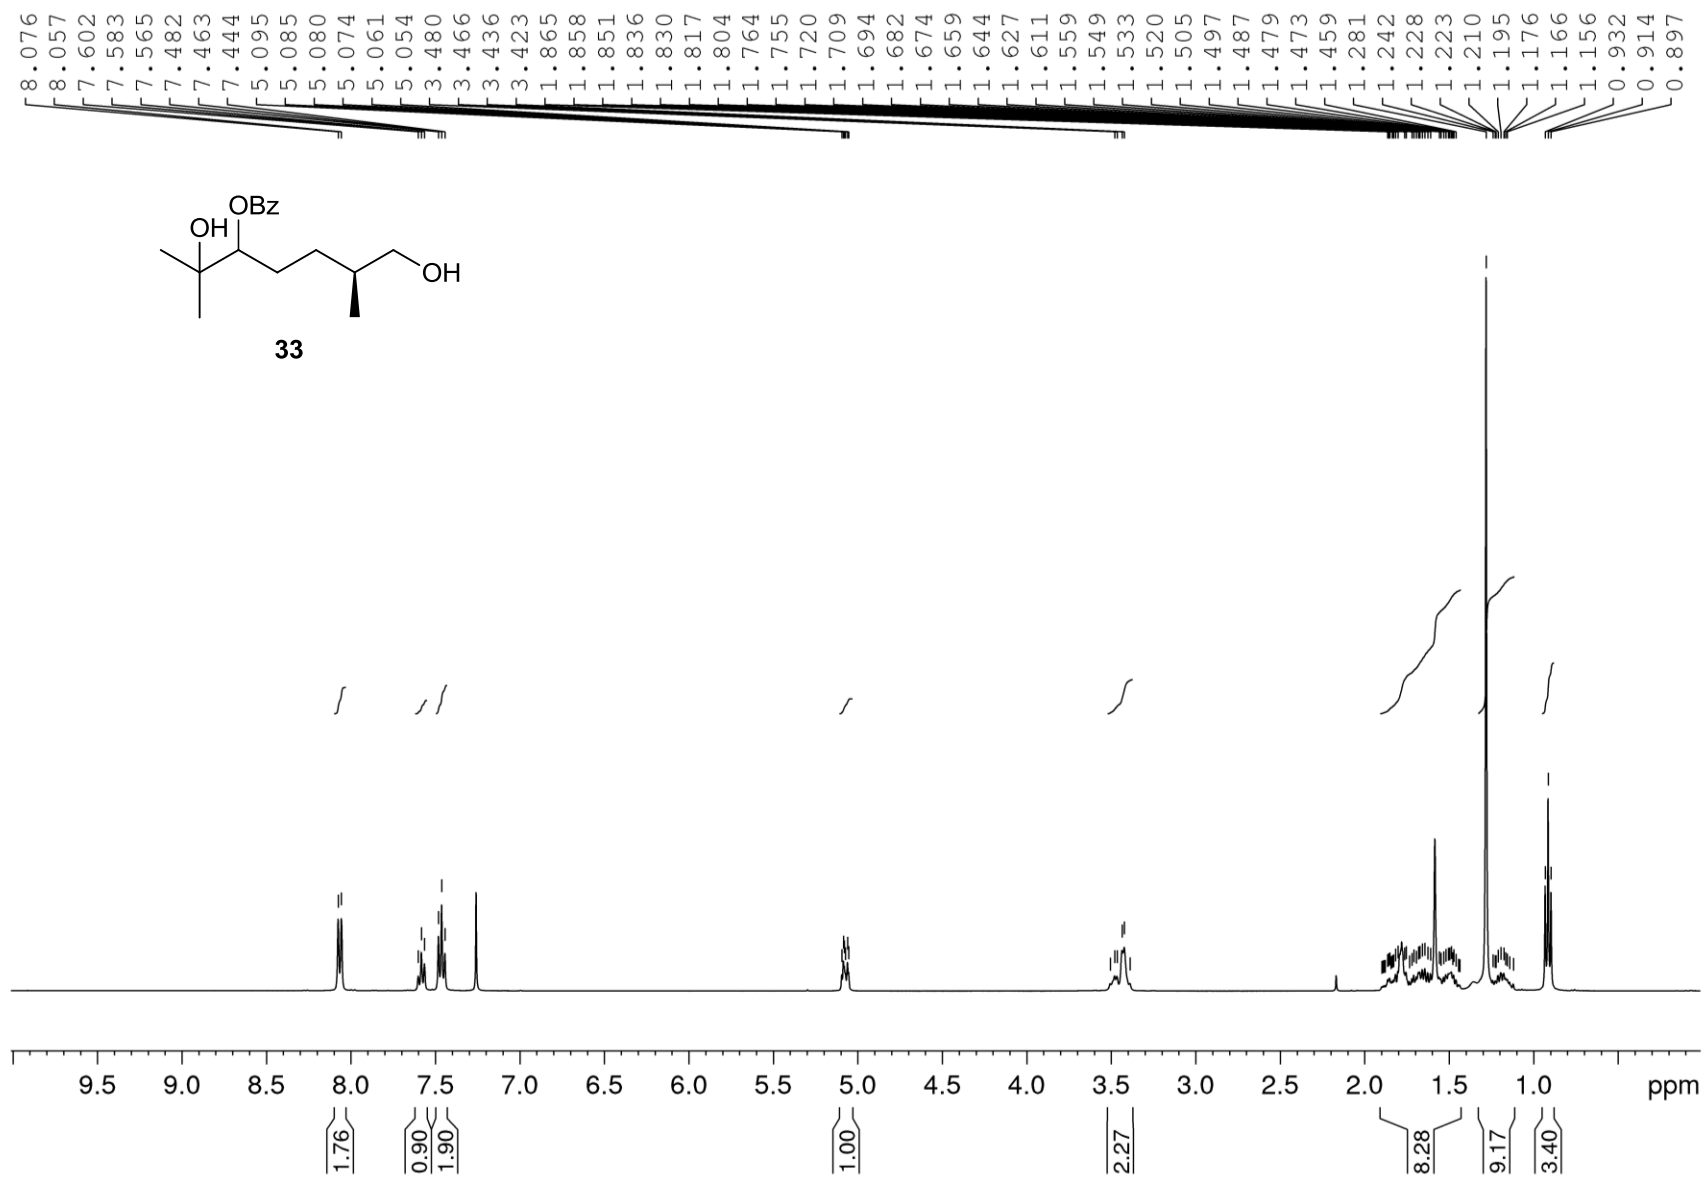

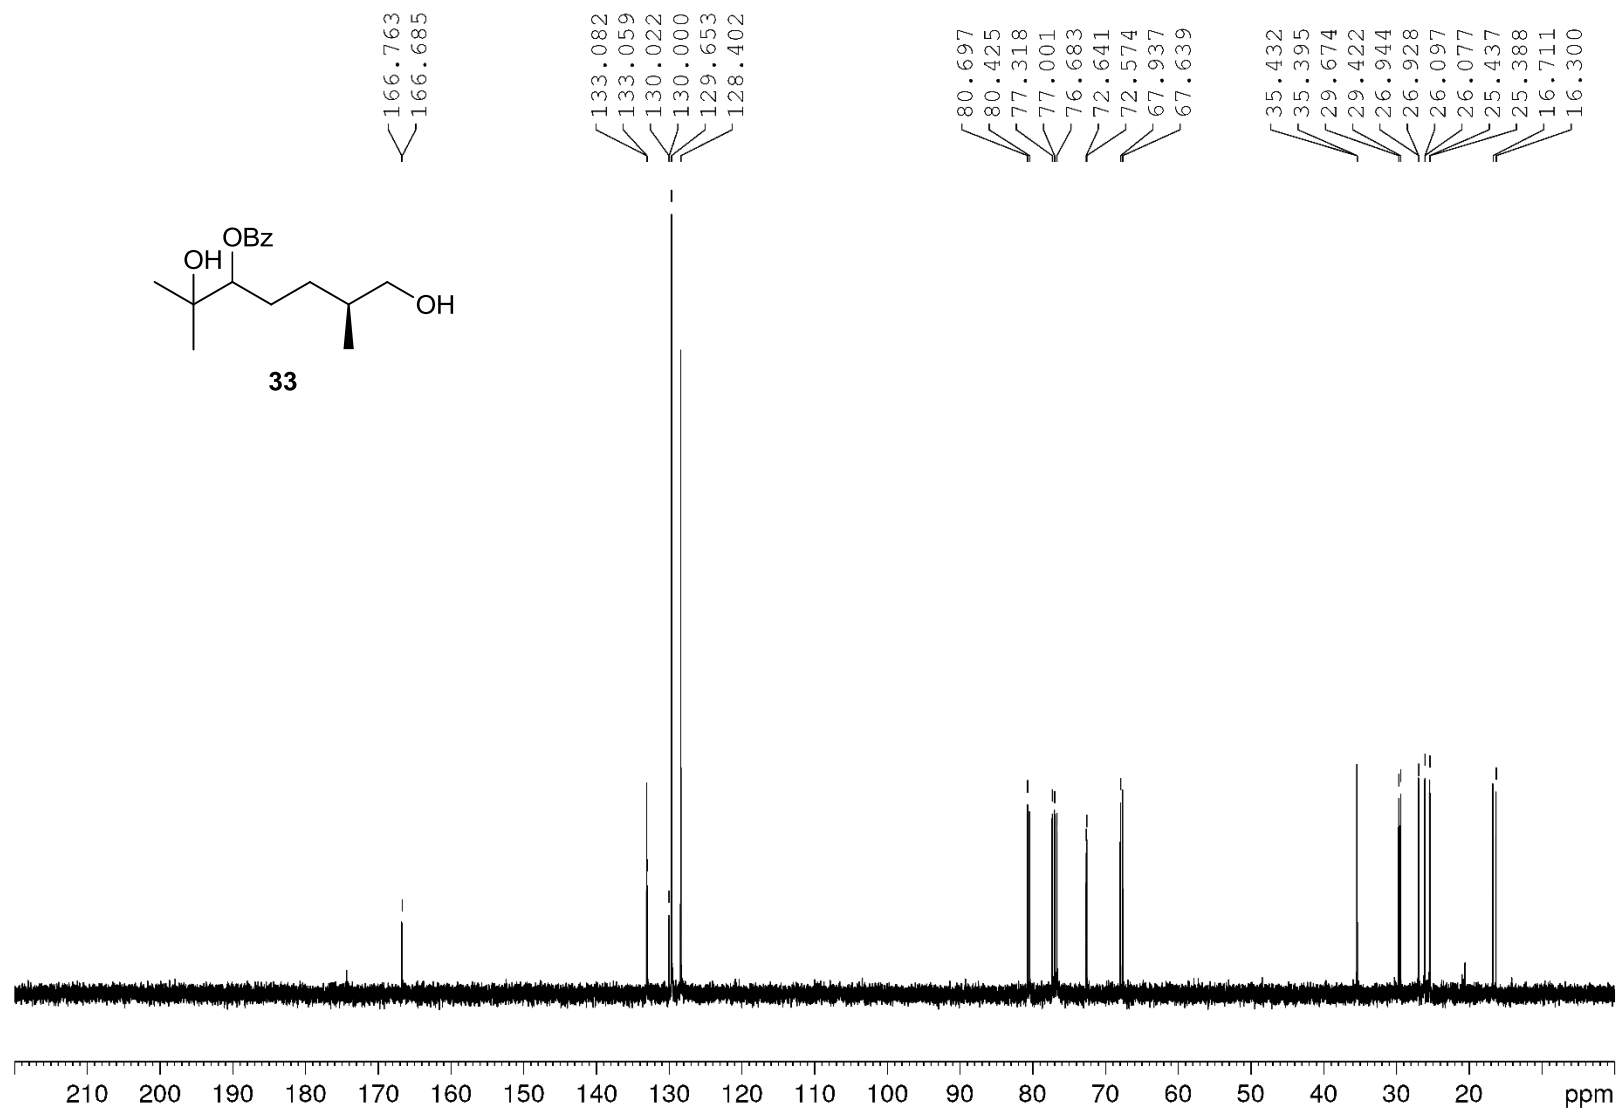

**Figure S10.**  $^{13}\text{C}$  NMR spectrum of compound **33** ( $\text{CDCl}_3$ , 100 MHz)

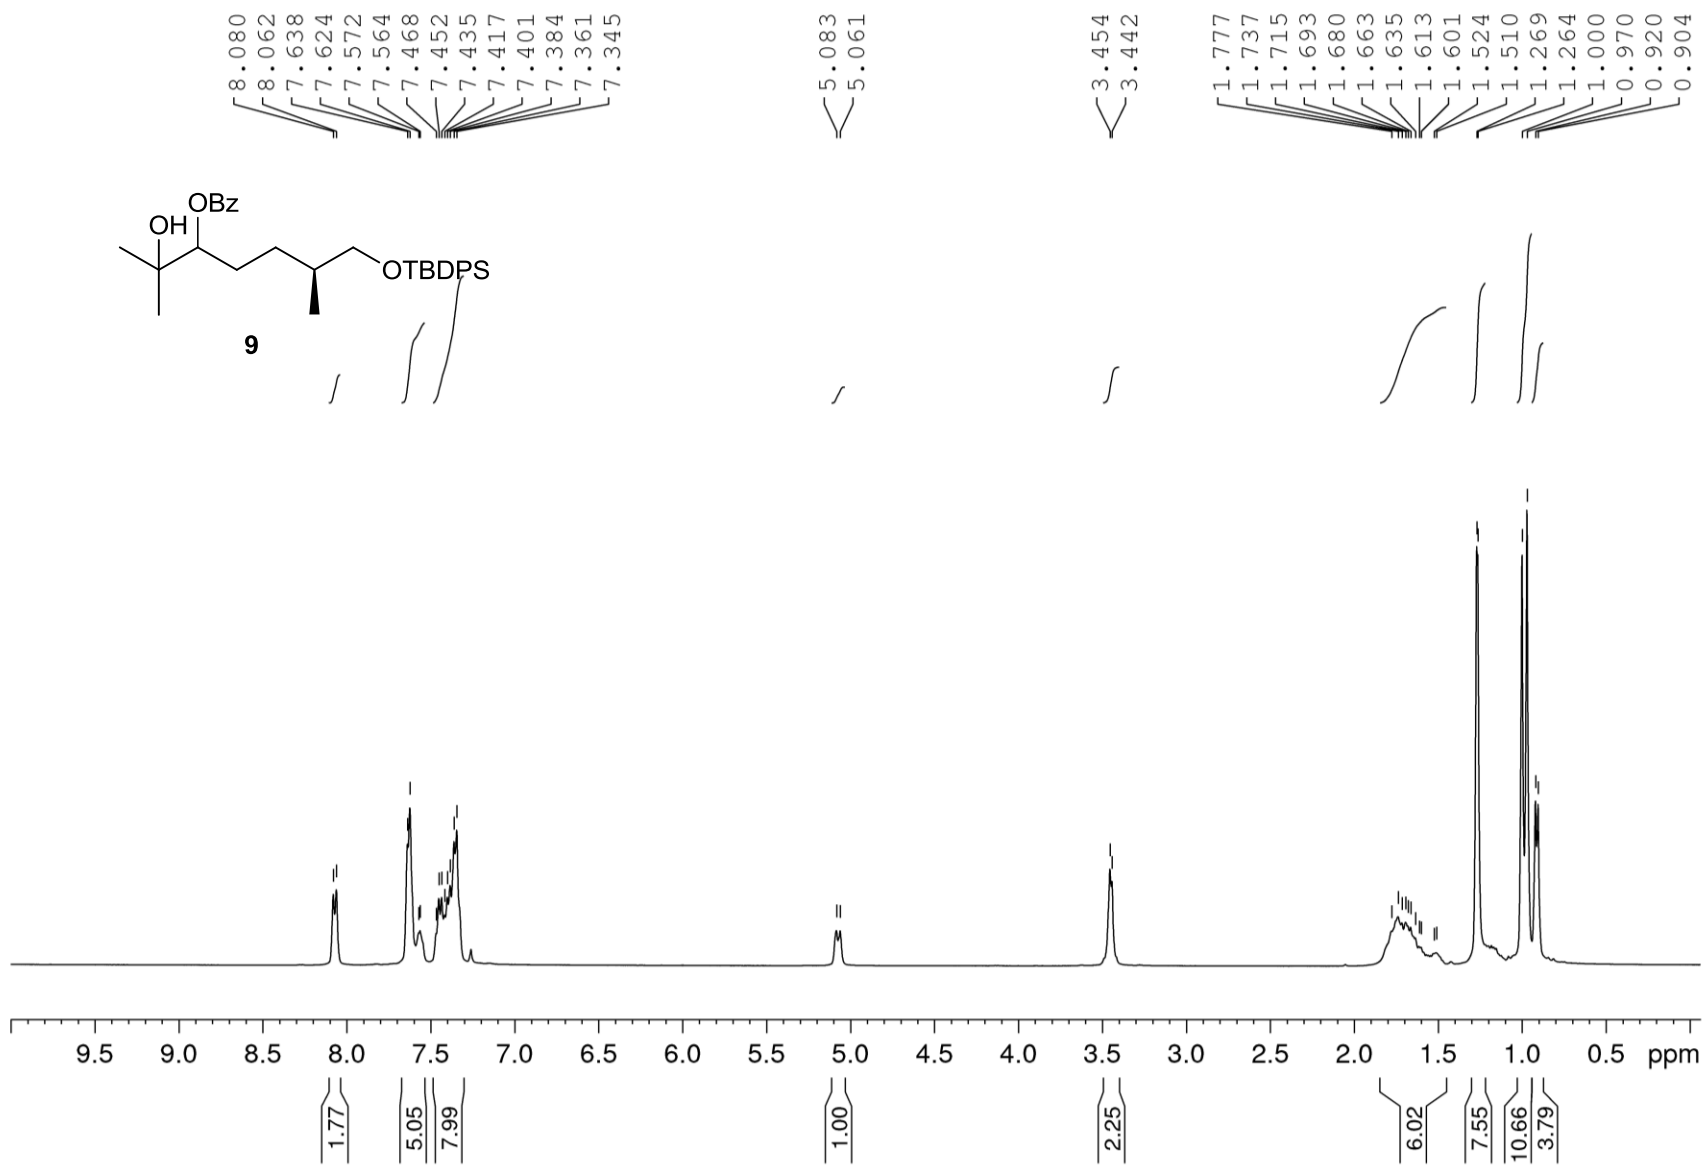

**Figure S11.**  $^1\text{H}$  NMR spectrum of compound **9** ( $\text{CDCl}_3$ , 400 MHz)

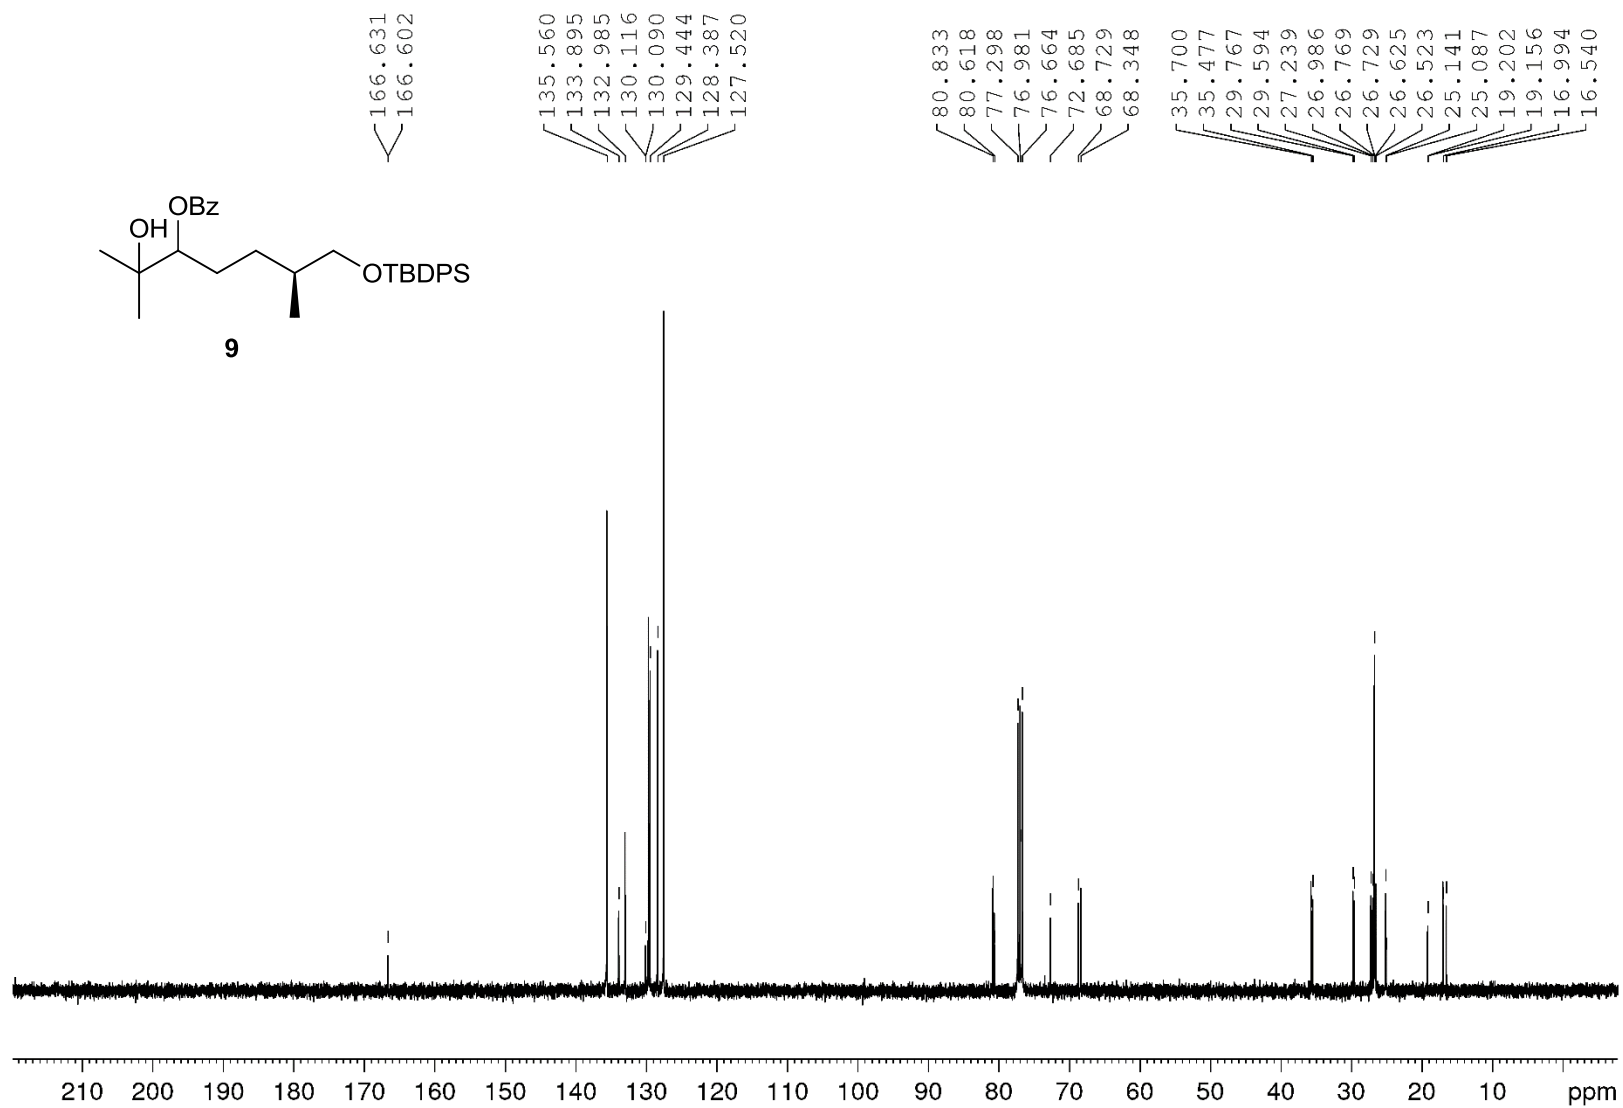

**Figure S12.**  $^{13}\text{C}$  NMR spectrum of compound **9** (CDCl<sub>3</sub>, 100 MHz)

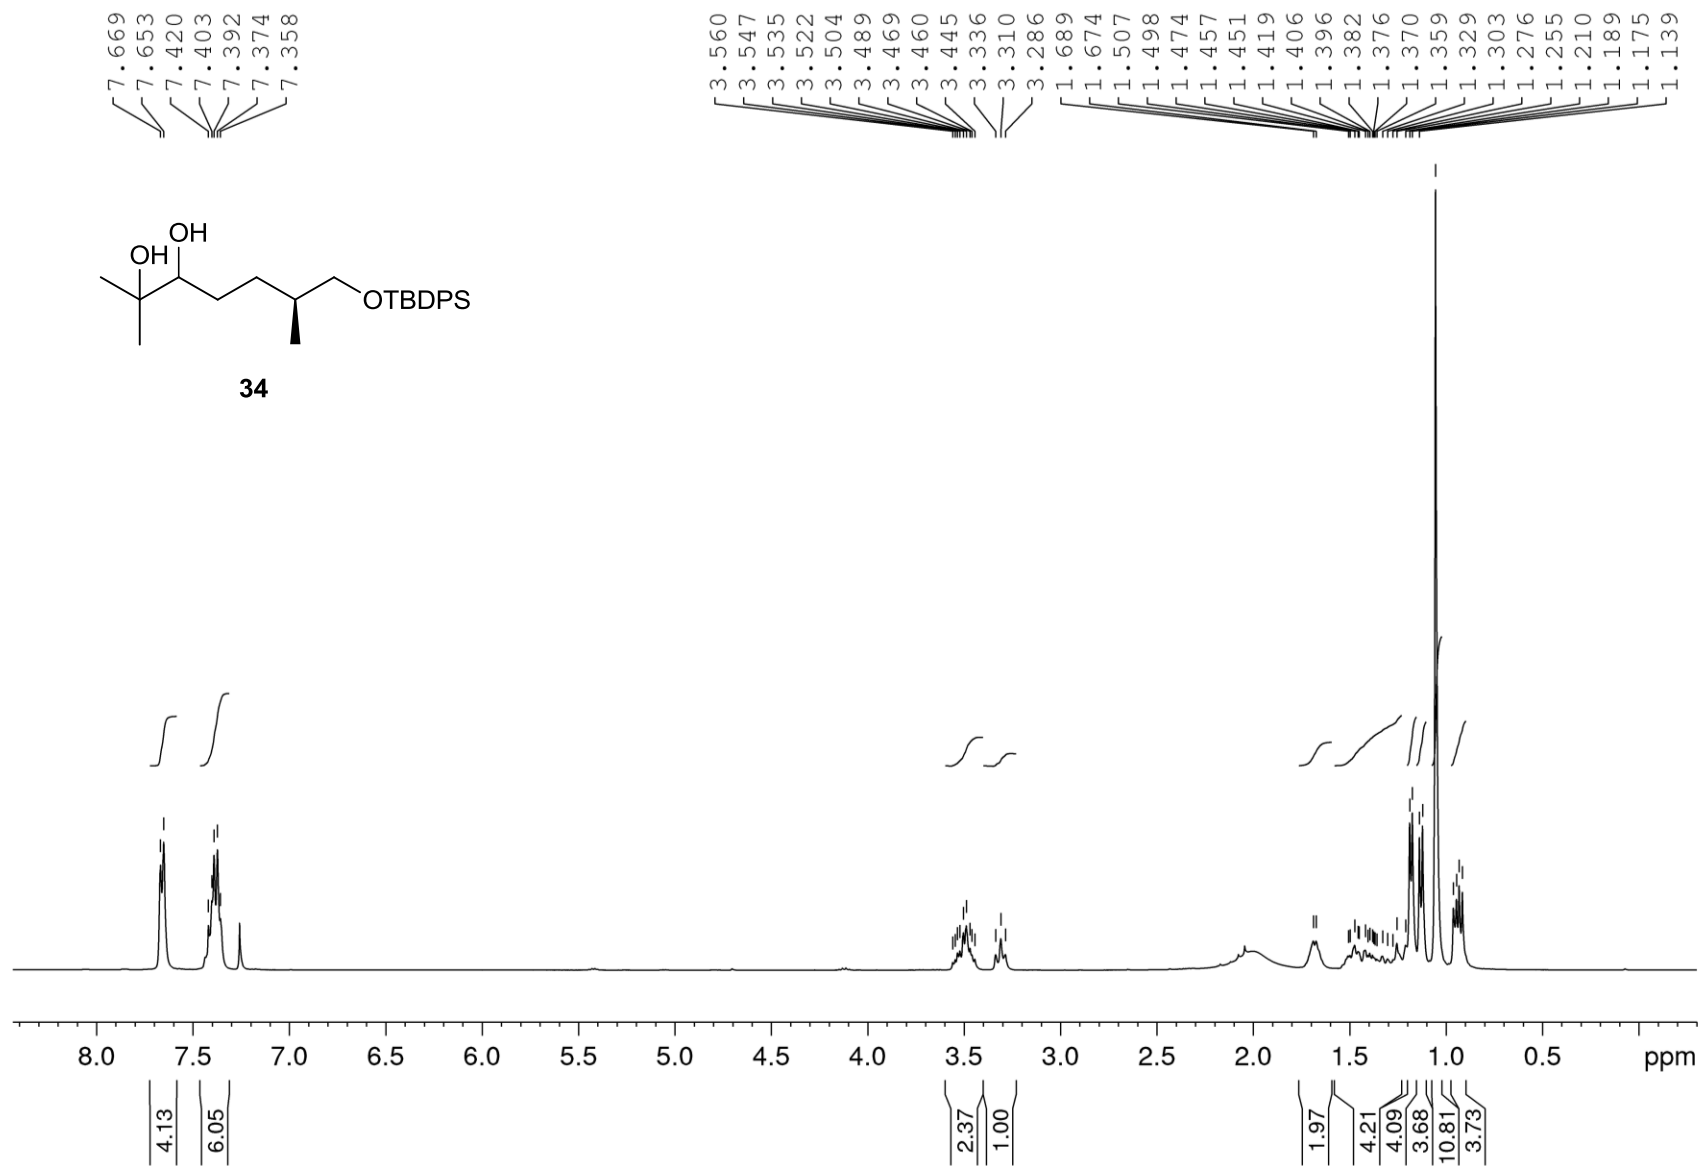

**Figure S13.**  $^1\text{H}$  NMR spectrum of compound **34** (CDCl<sub>3</sub>, 400 MHz)

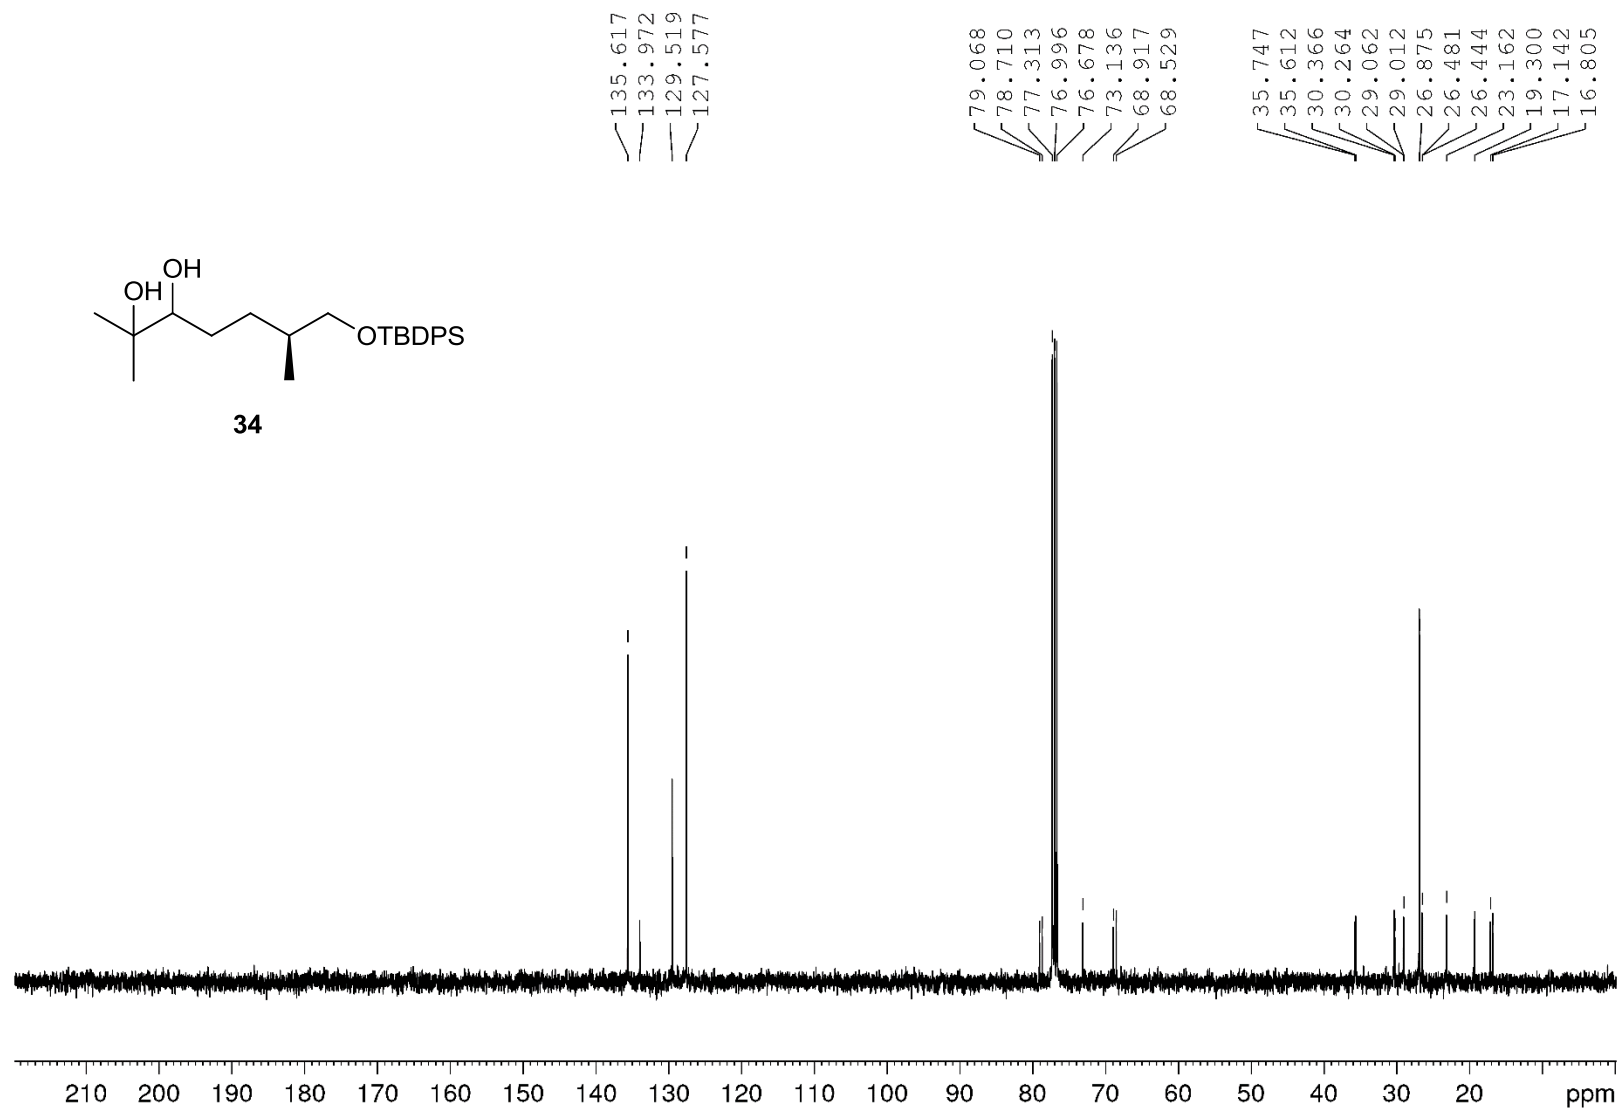

**Figure S14.**  $^{13}\text{C}$  NMR spectrum of compound **34** (CDCl<sub>3</sub>, 100 MHz)



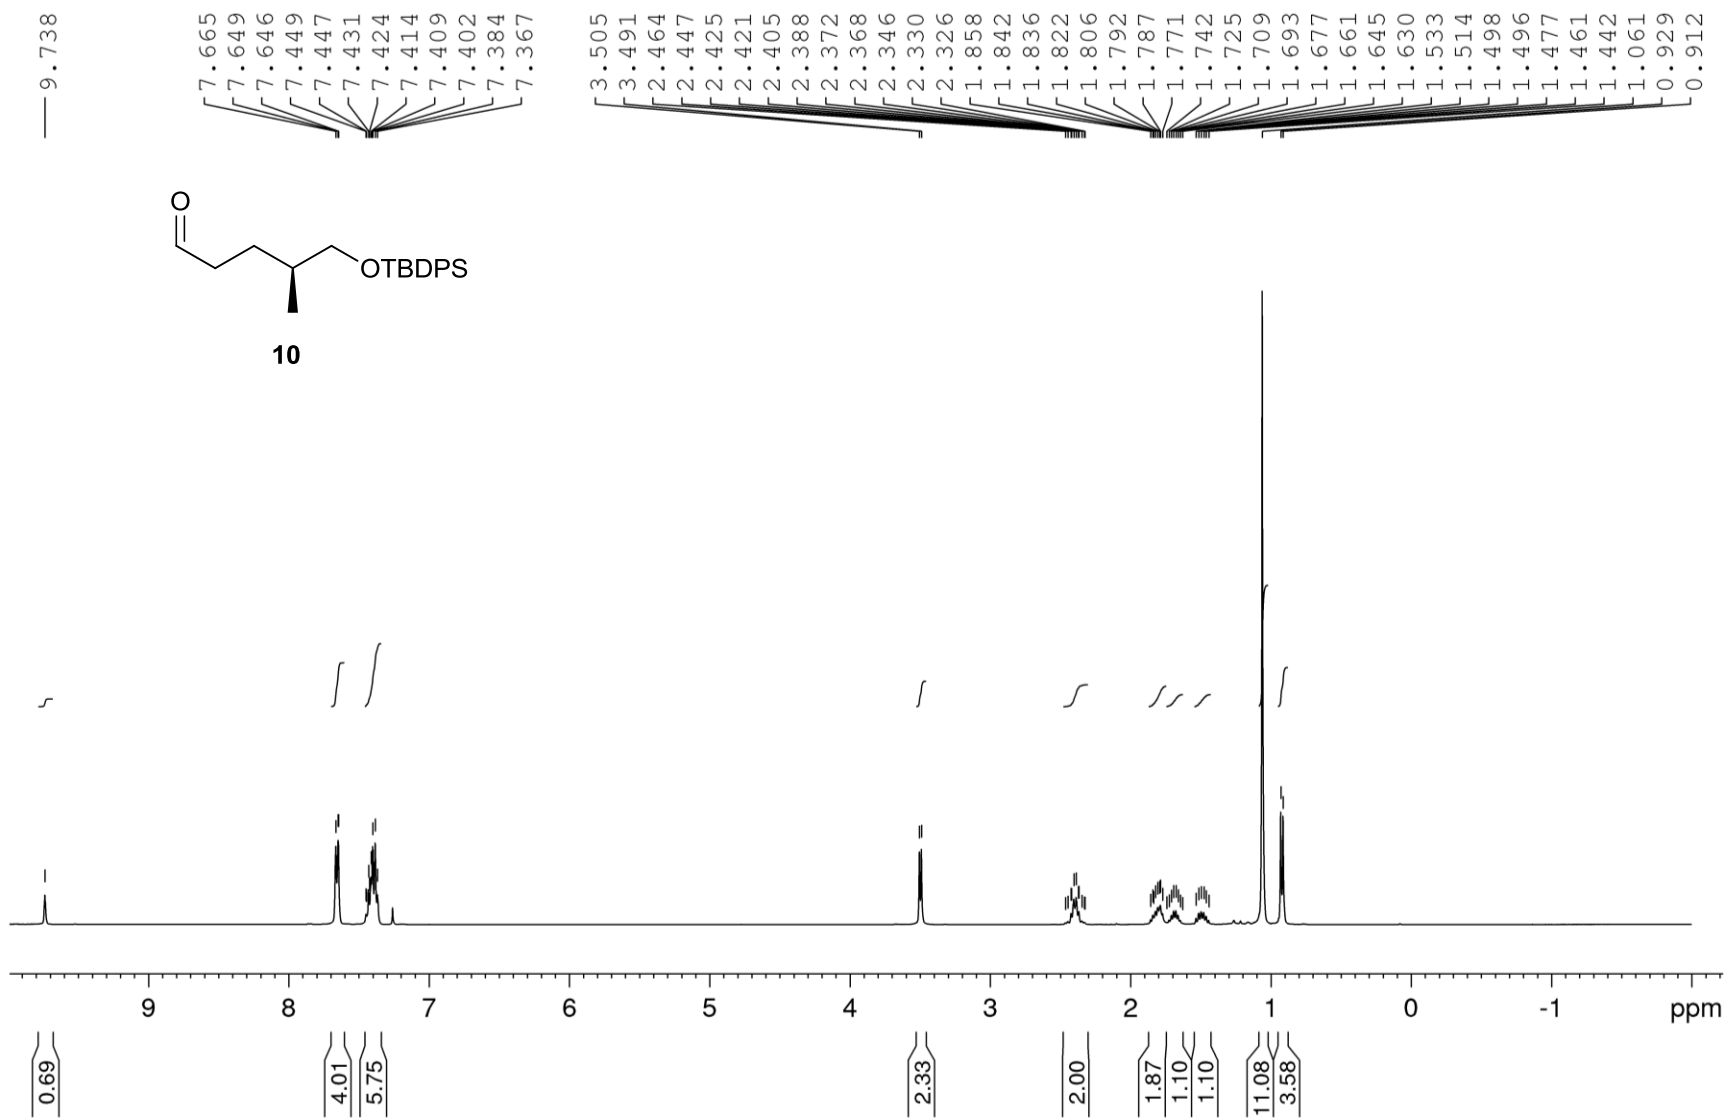

**Figure S15.** <sup>1</sup>H NMR spectrum of compound **10** (CDCl<sub>3</sub>, 400 MHz)

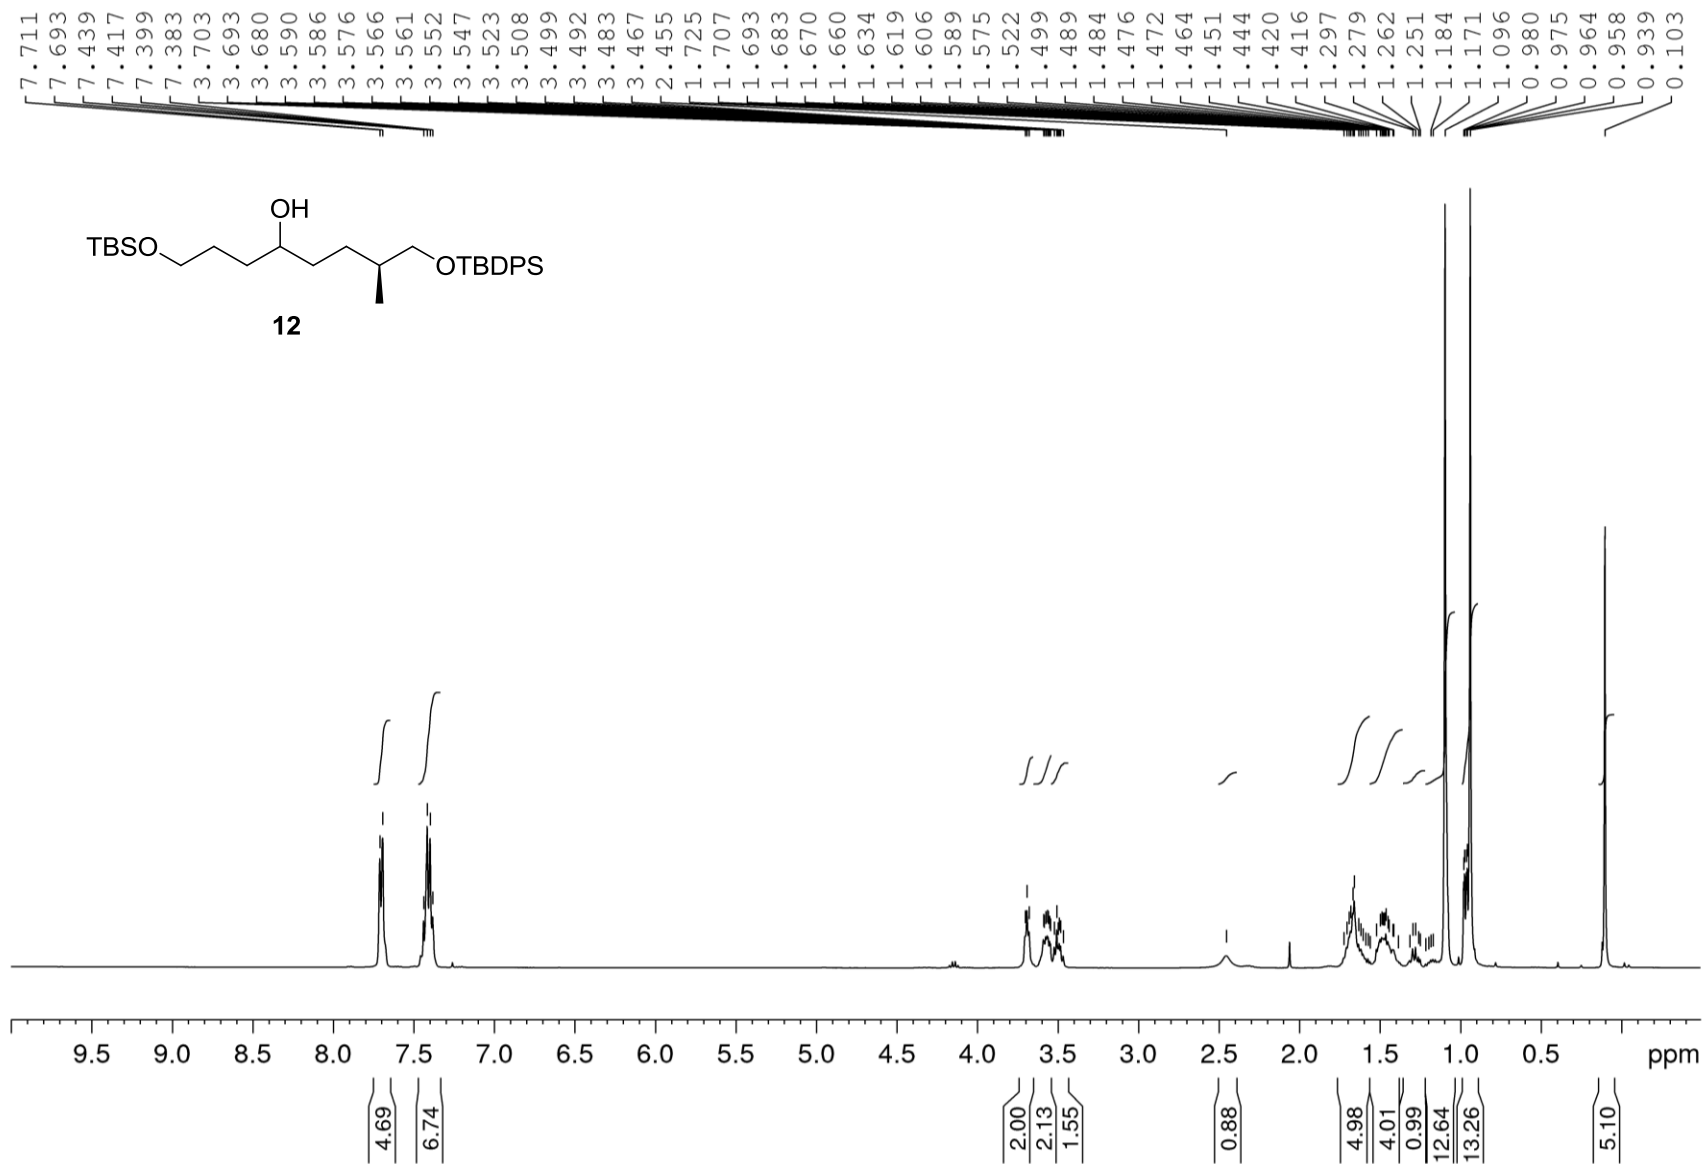

**Figure S16.**  $^1\text{H}$  NMR spectrum of compound **12** ( $\text{CDCl}_3$ , 400 MHz)

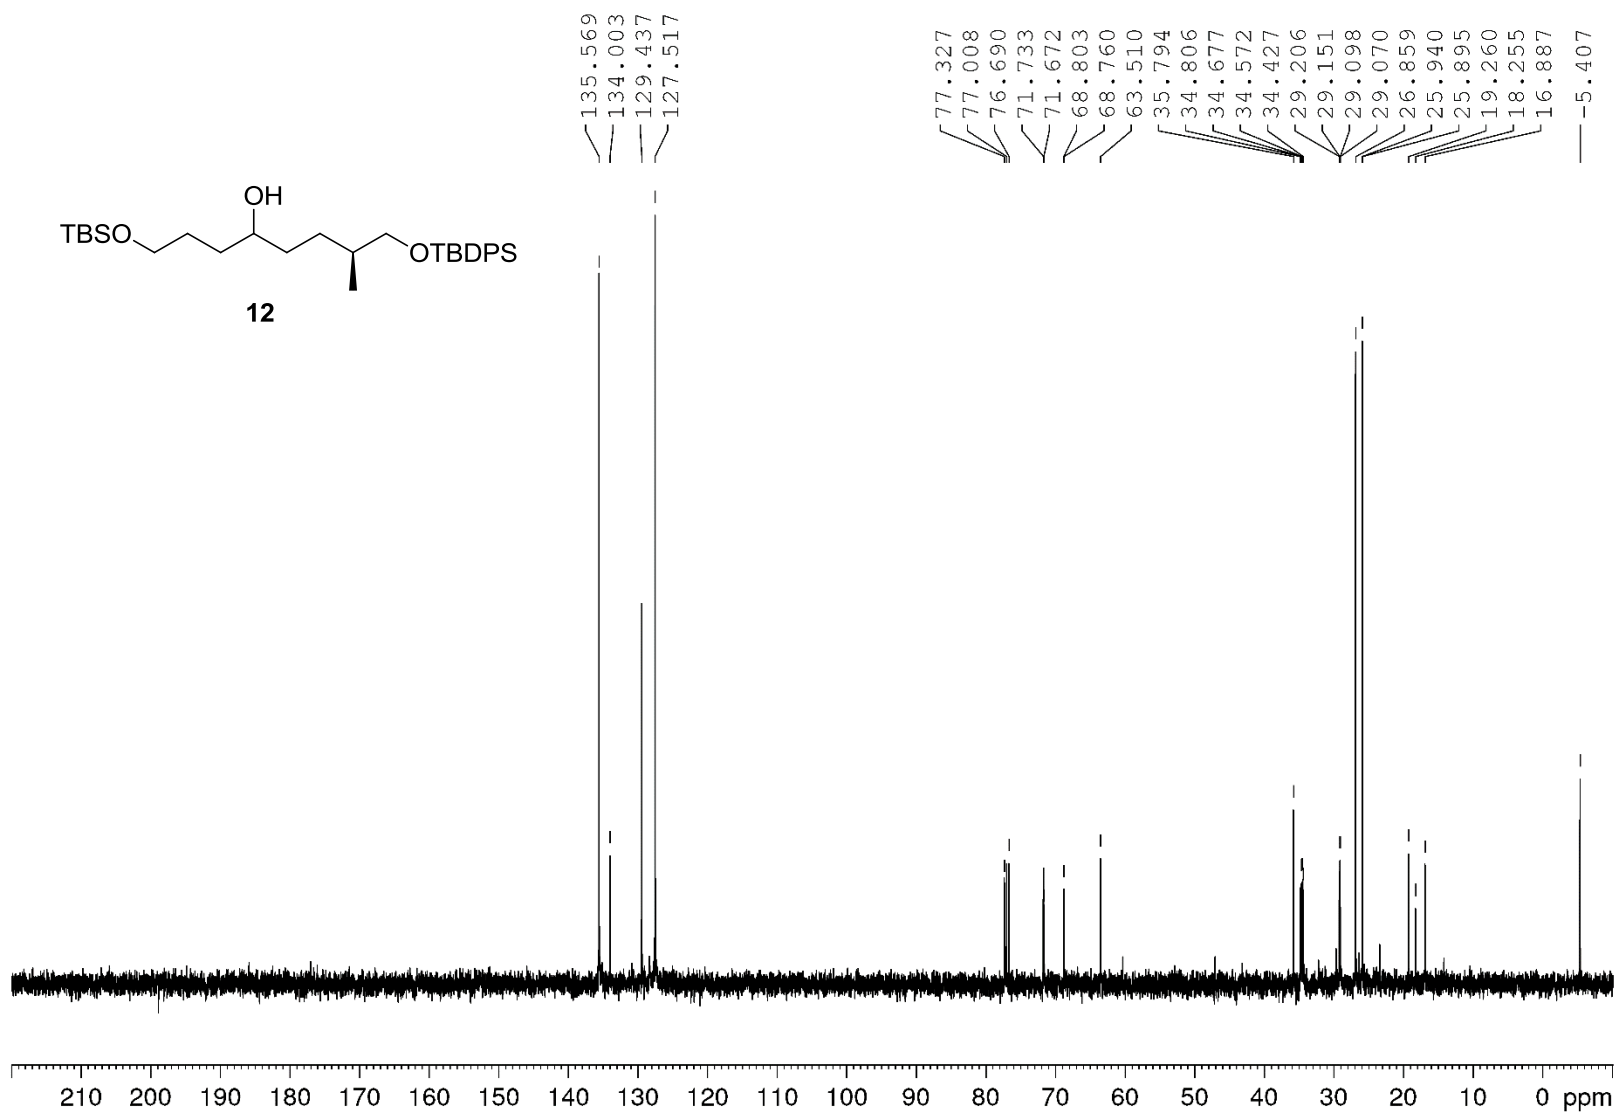

**Figure S17.** <sup>13</sup>C NMR spectrum of compound **12** (CDCl<sub>3</sub>, 100 MHz)



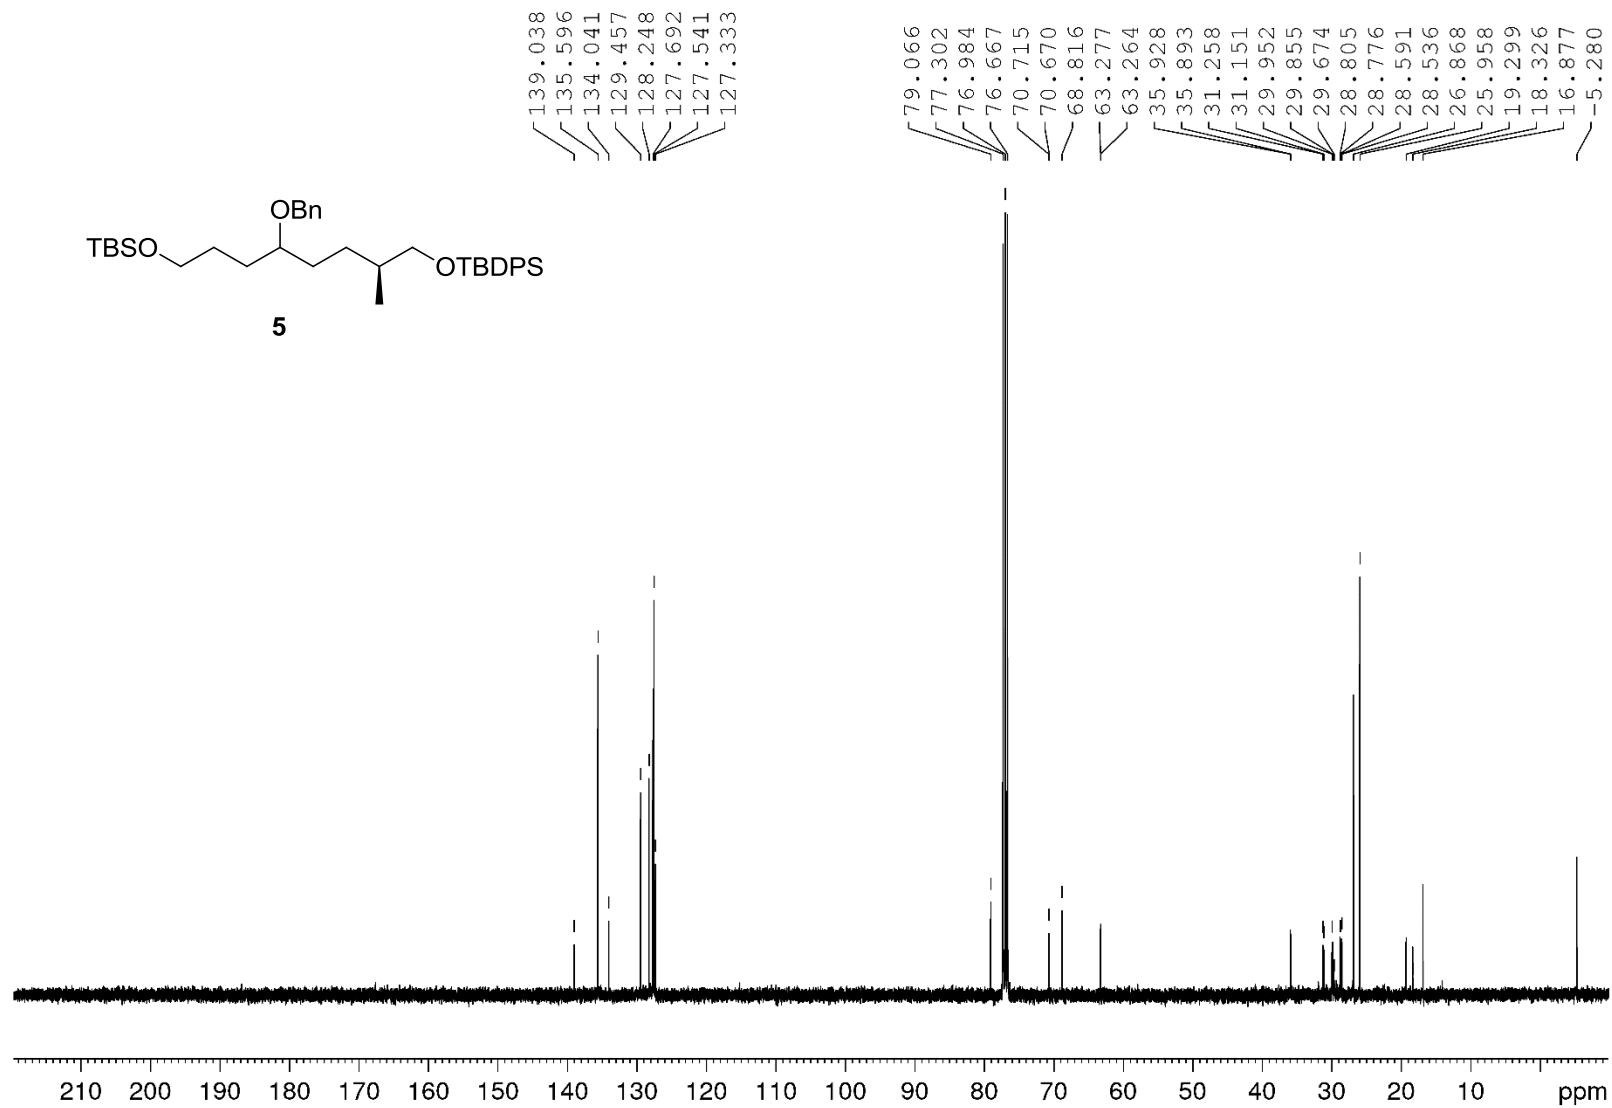

**Figure S19.**  $^{13}\text{C}$  NMR spectrum of compound **5** ( $\text{CDCl}_3$ , 100 MHz)

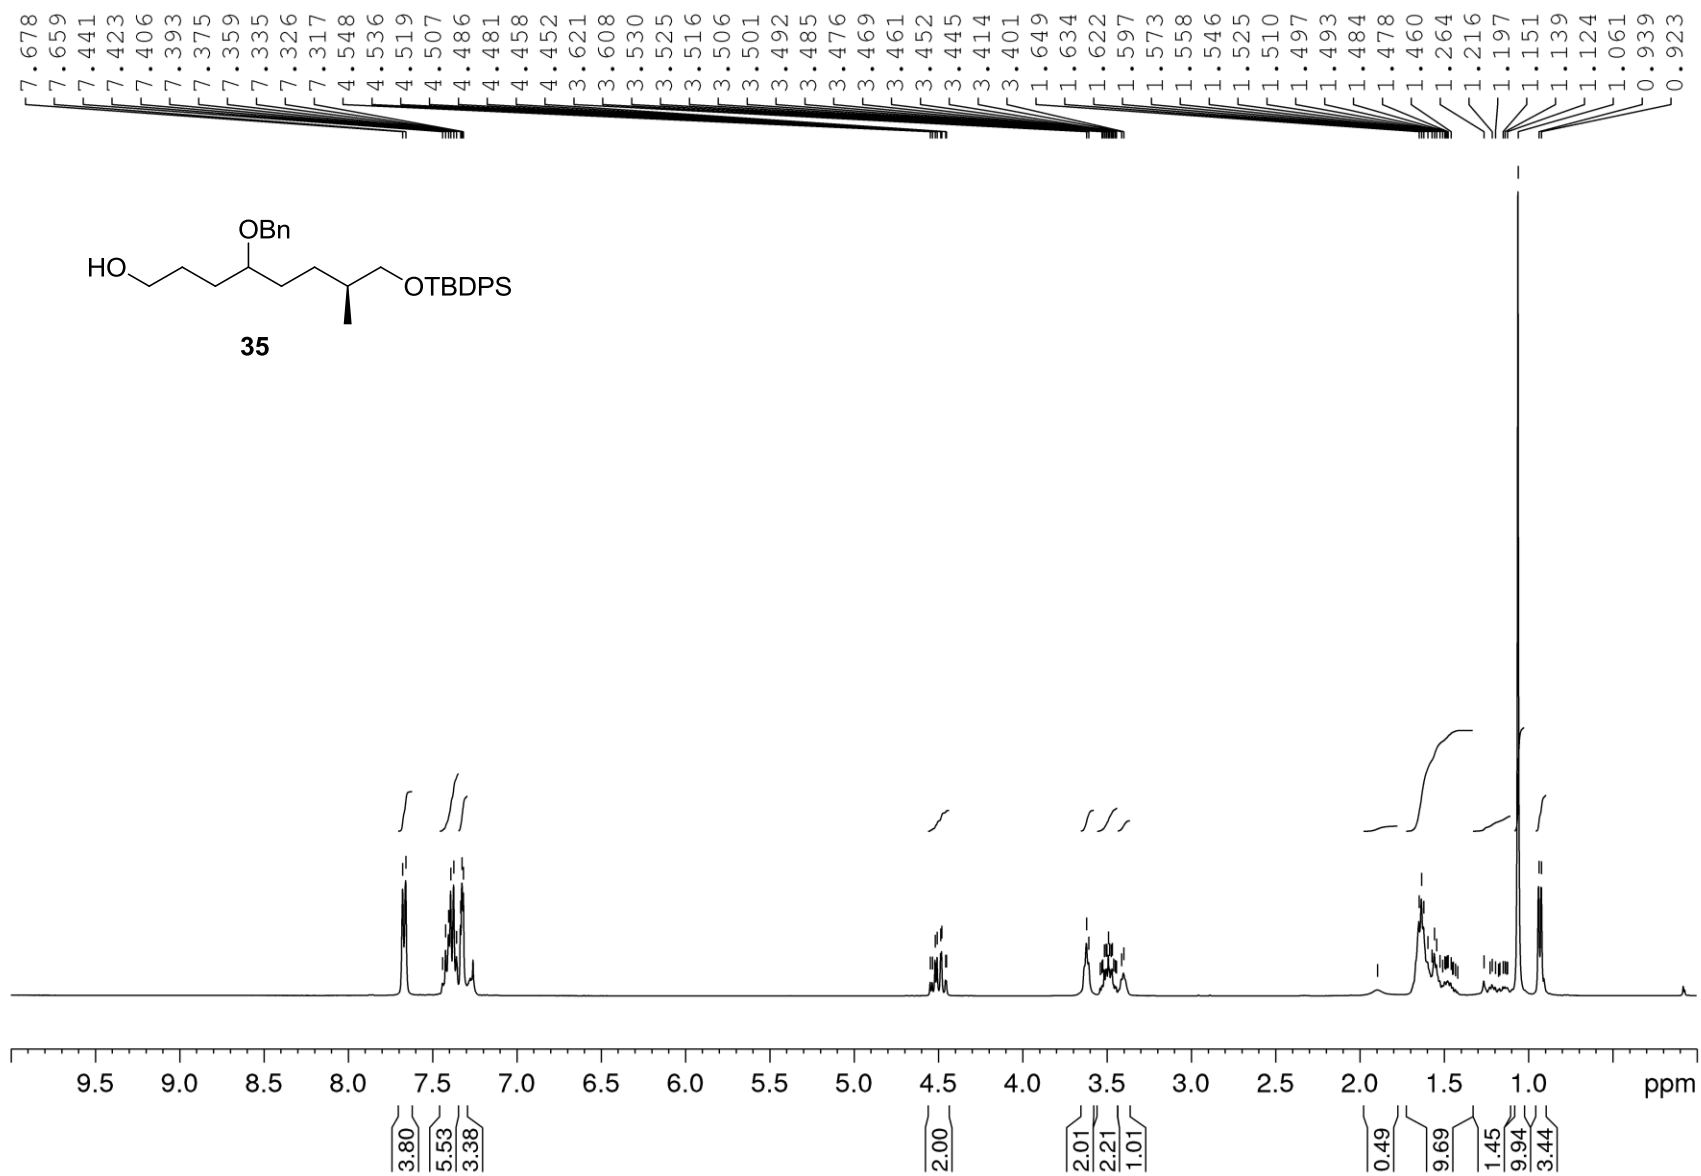

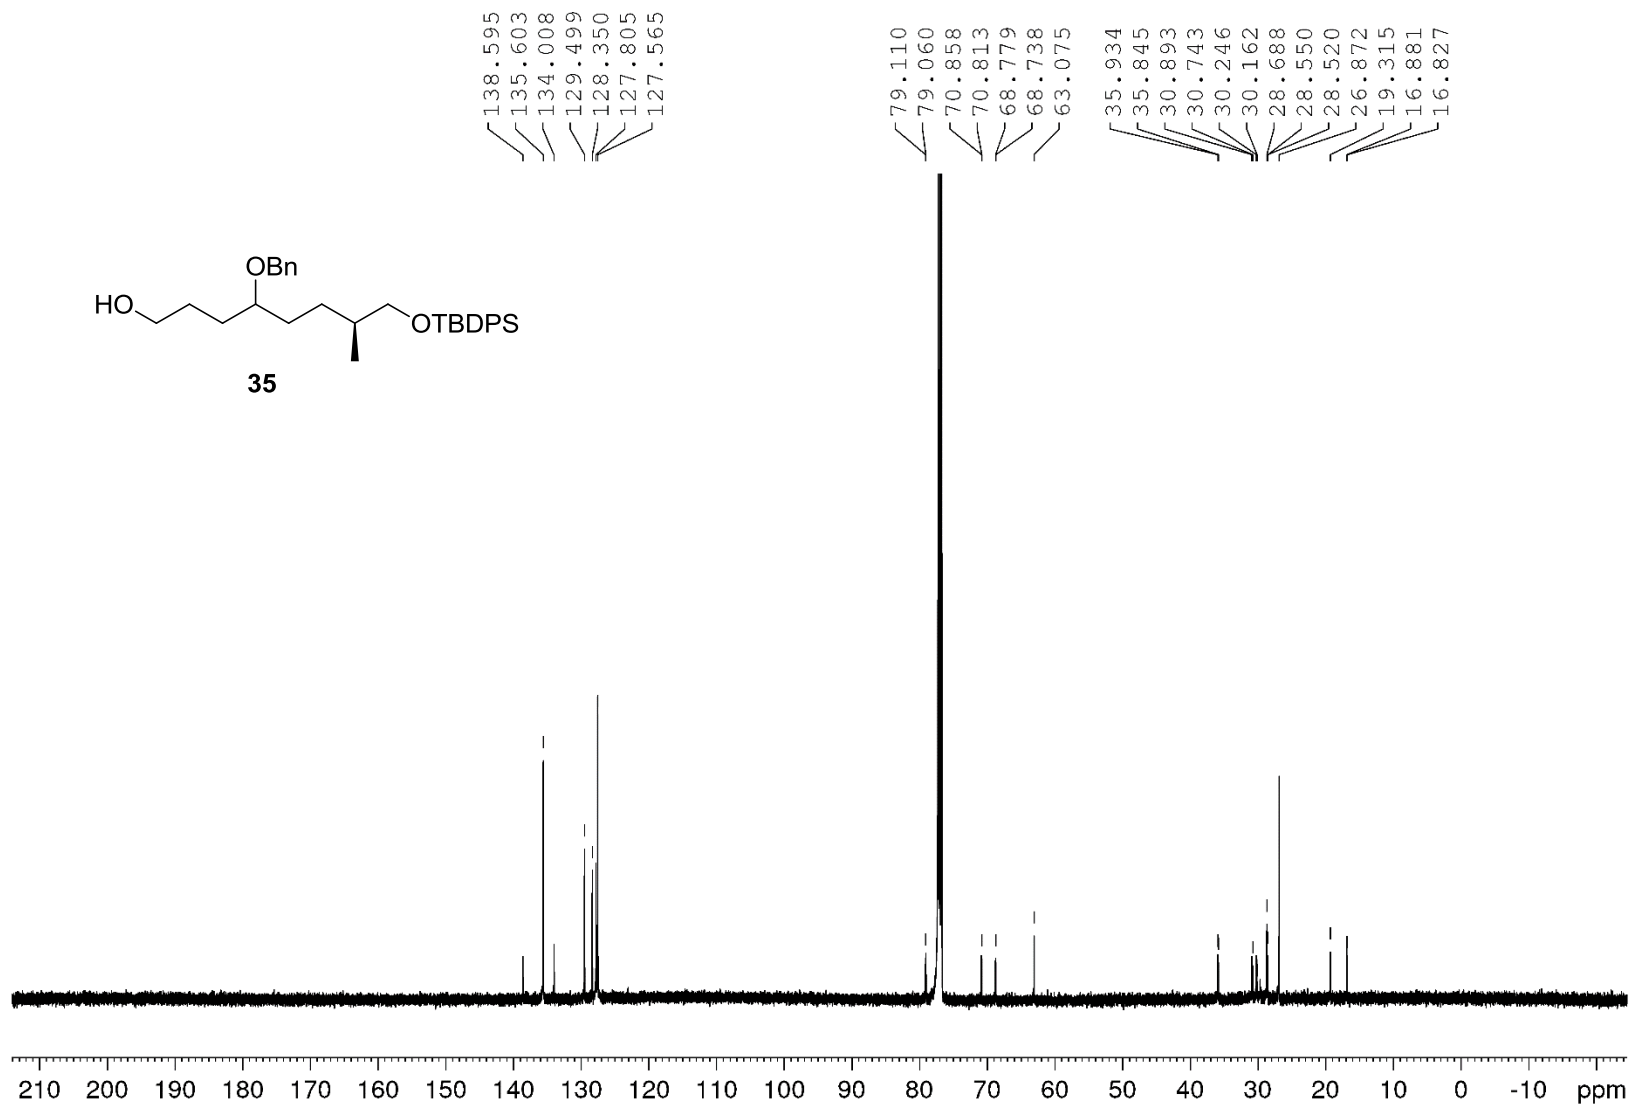

**Figure S21.**  $^{13}\text{C}$  NMR spectrum of compound **35** (CDCl<sub>3</sub>, 100 MHz)

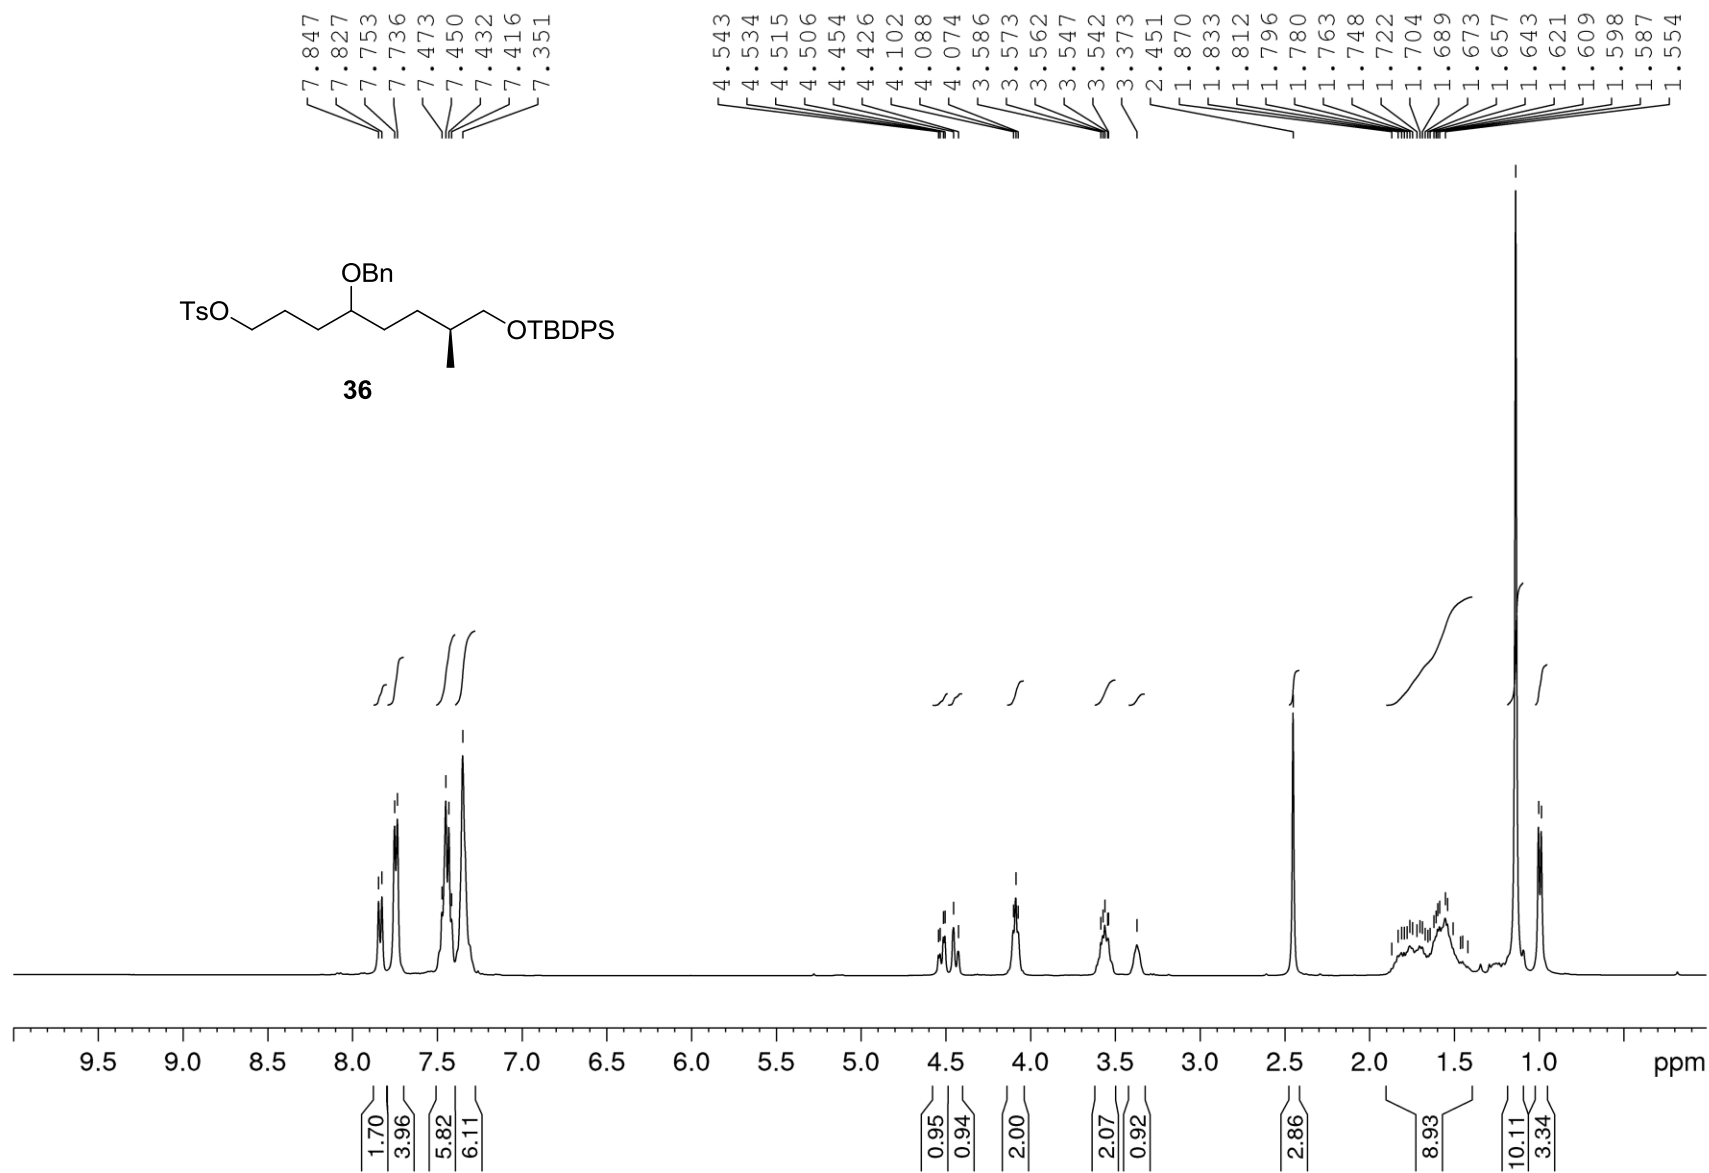

**Figure S22.** <sup>1</sup>H NMR spectrum of compound **36** (CDCl<sub>3</sub>, 400 MHz)



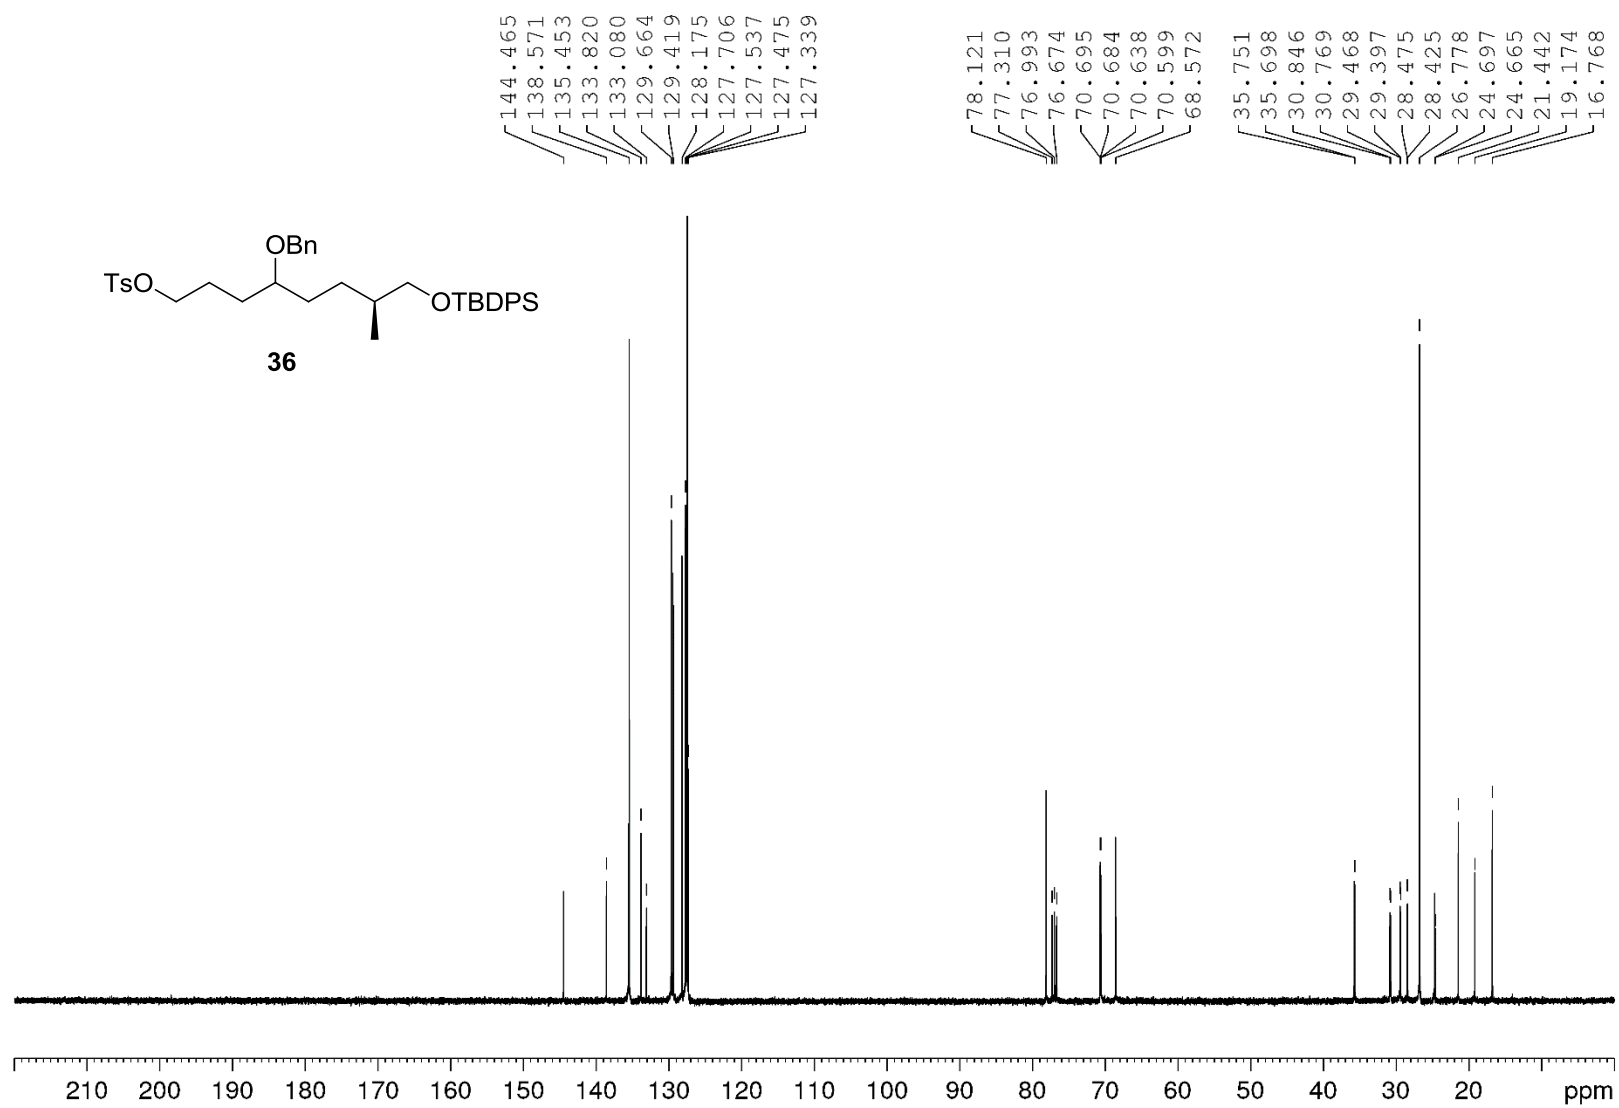

Figure S23. <sup>13</sup>C NMR spectrum of compound **36** (CDCl<sub>3</sub>, 100 MHz)

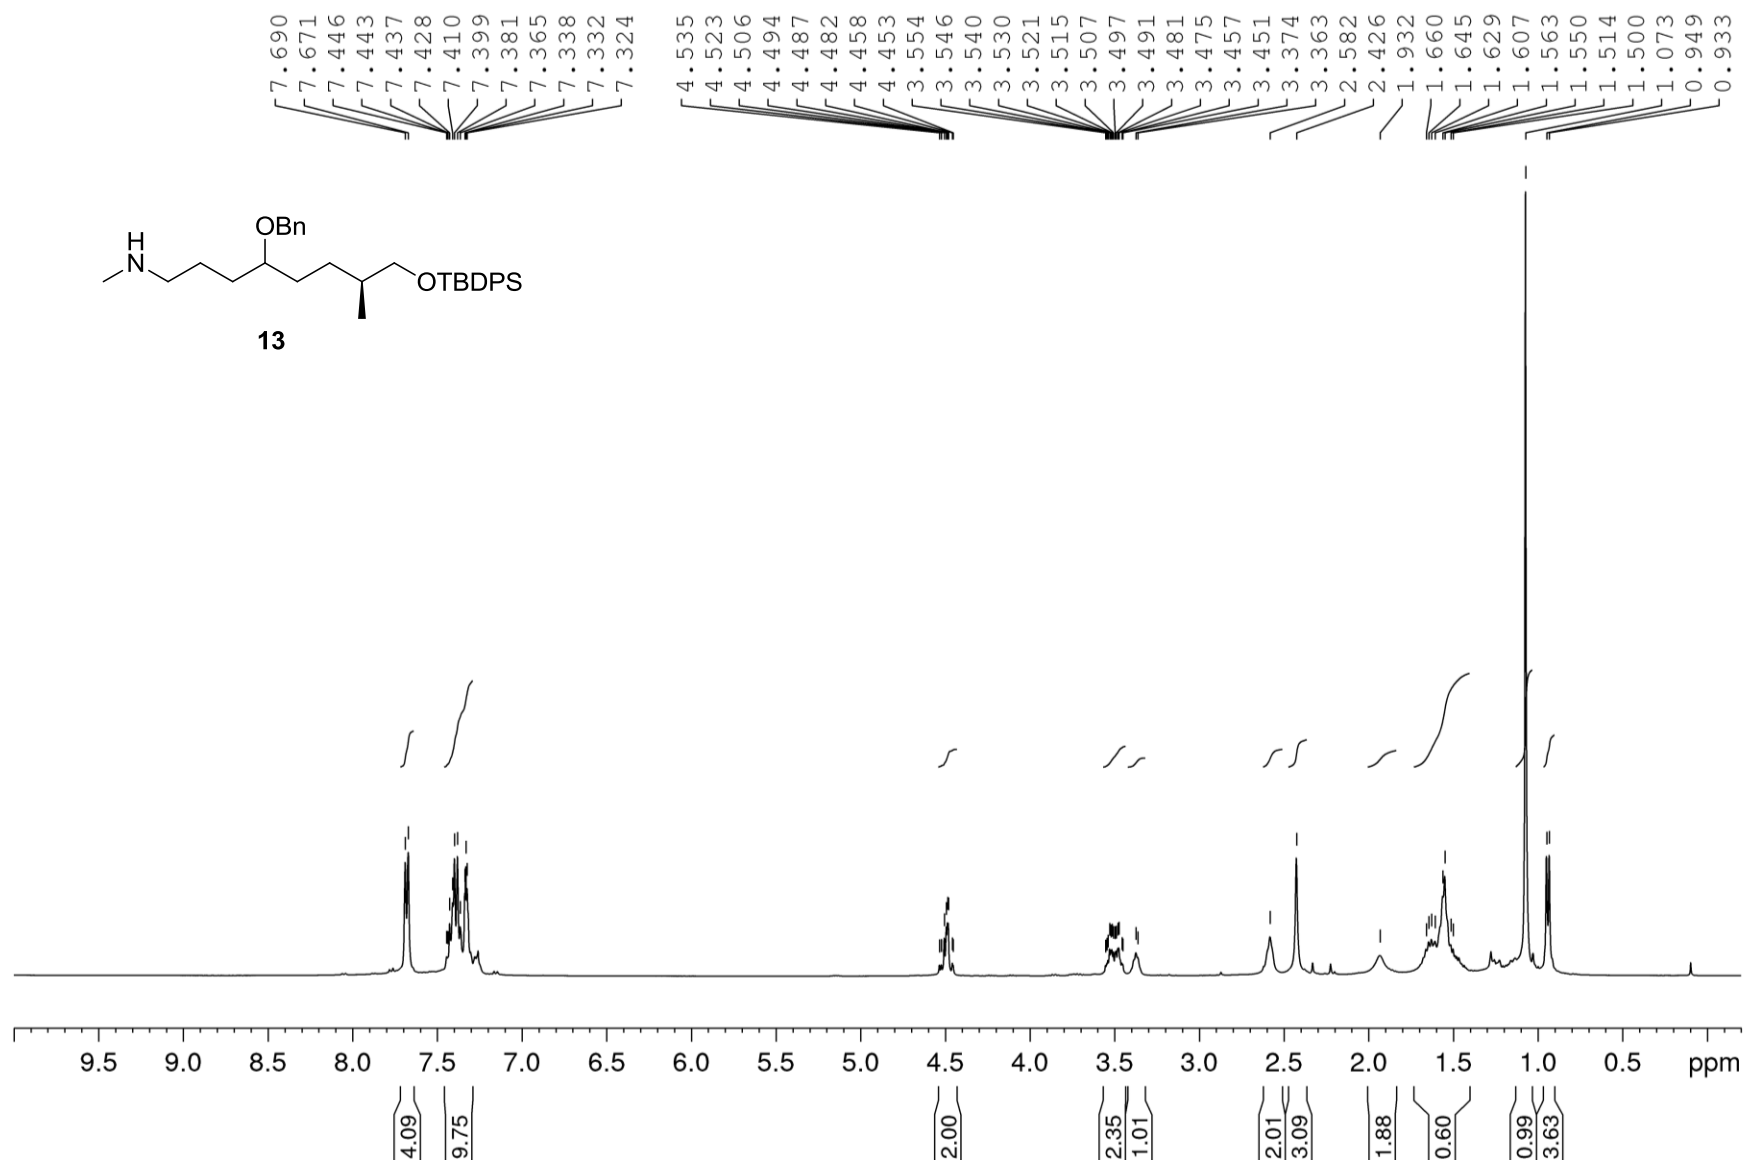

**Figure S24.** <sup>1</sup>H NMR spectrum of compound **13** (CDCl<sub>3</sub>, 400 MHz)

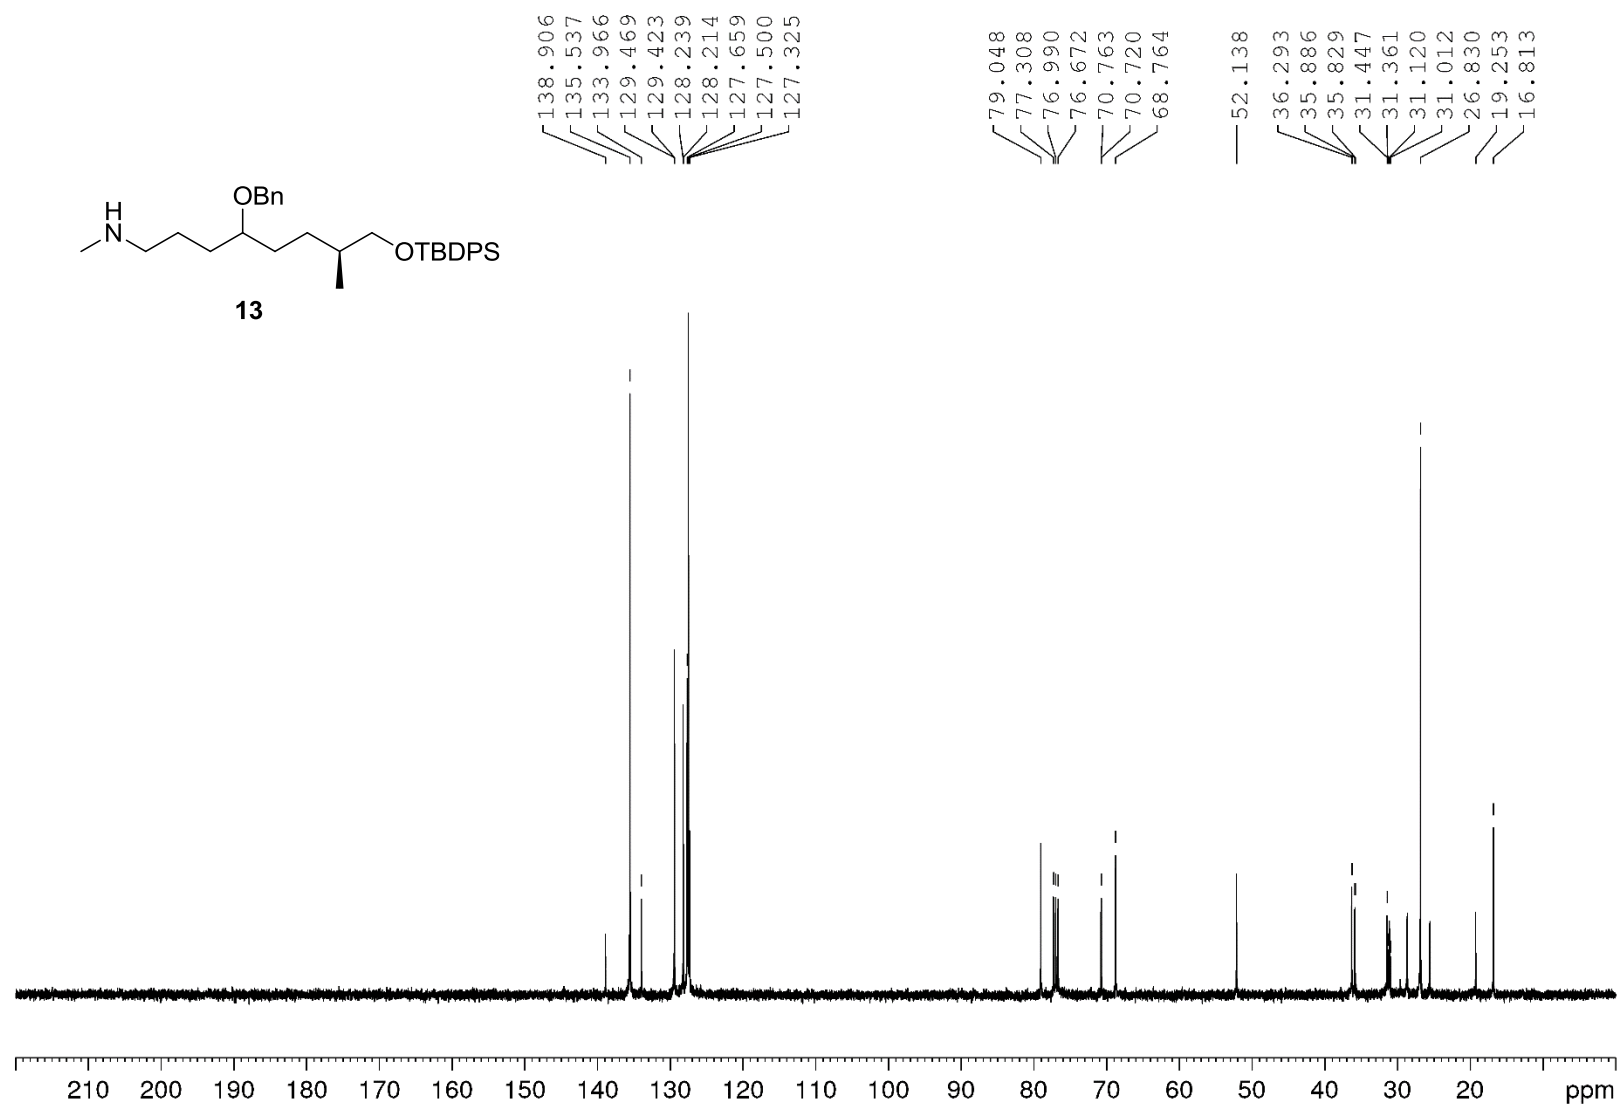

**Figure S25.**  $^{13}\text{C}$  NMR spectrum of compound **13** ( $\text{CDCl}_3$ , 100 MHz)

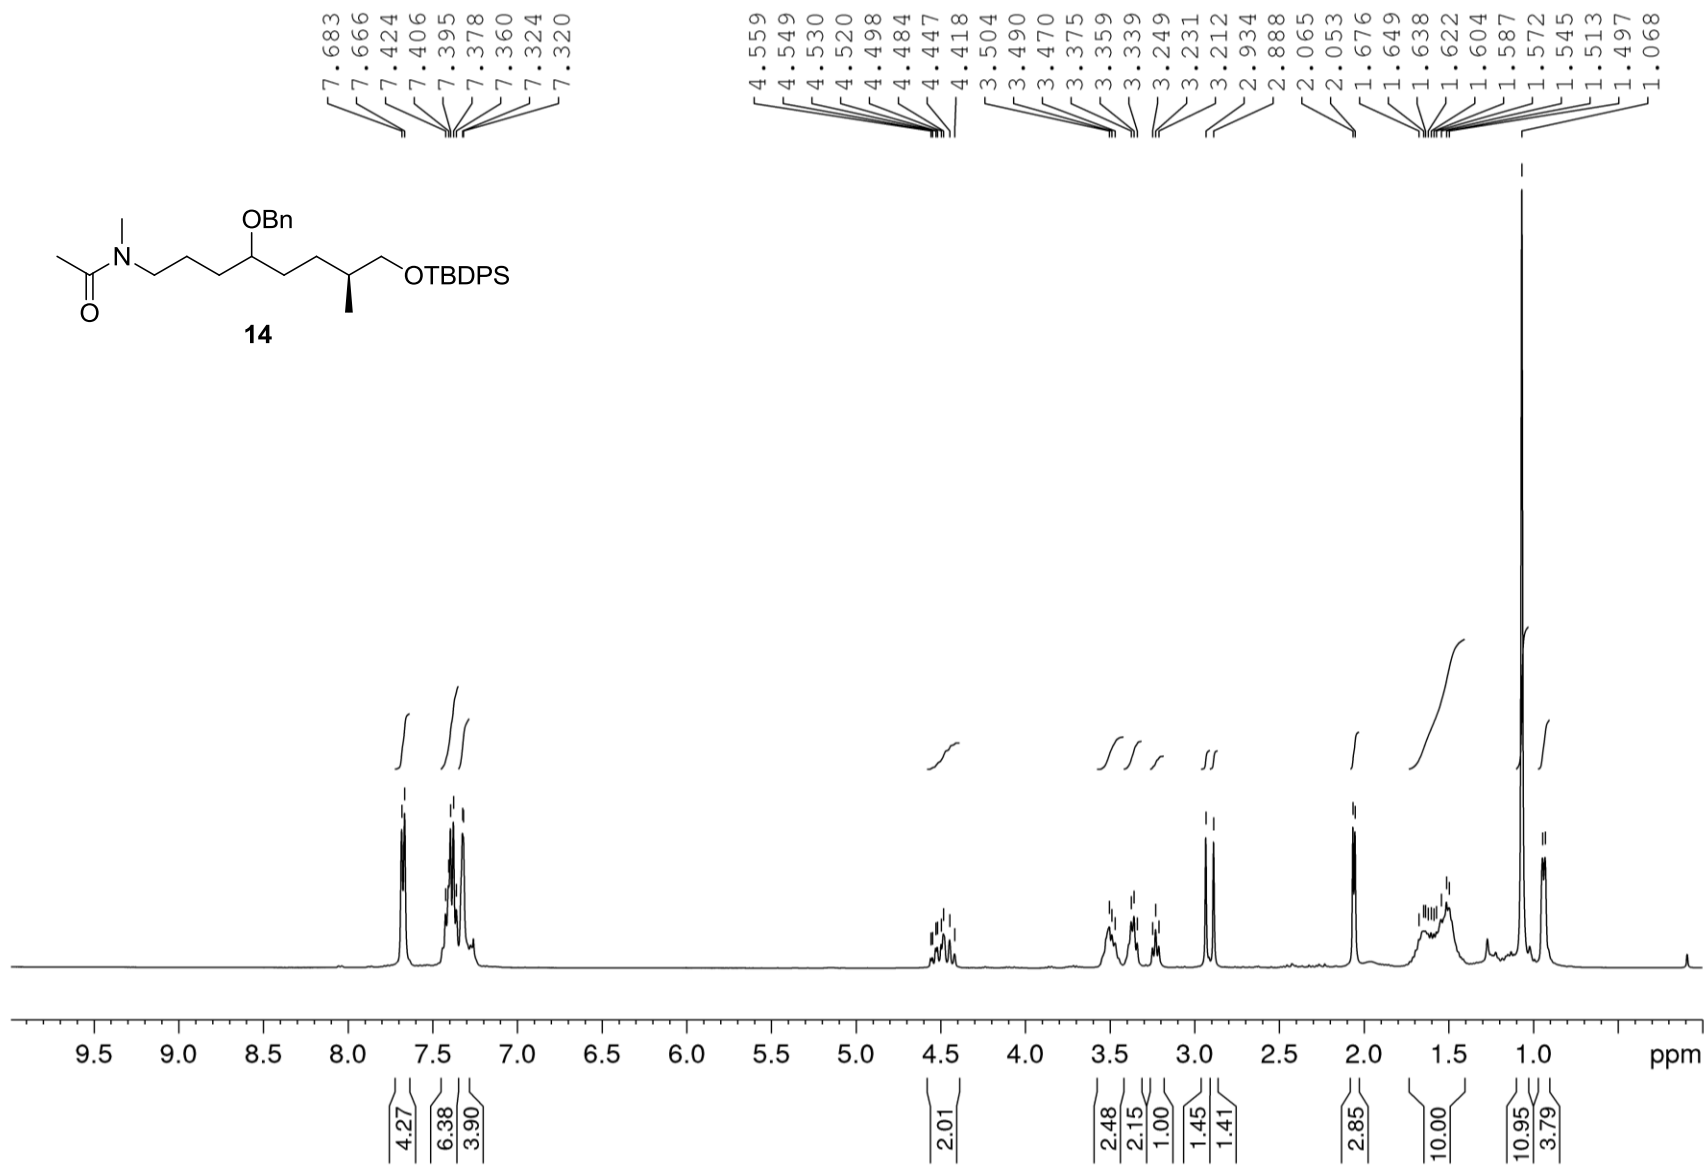

**Figure S26.** <sup>1</sup>H NMR spectrum of compound **14** (CDCl<sub>3</sub>, 400 MHz)

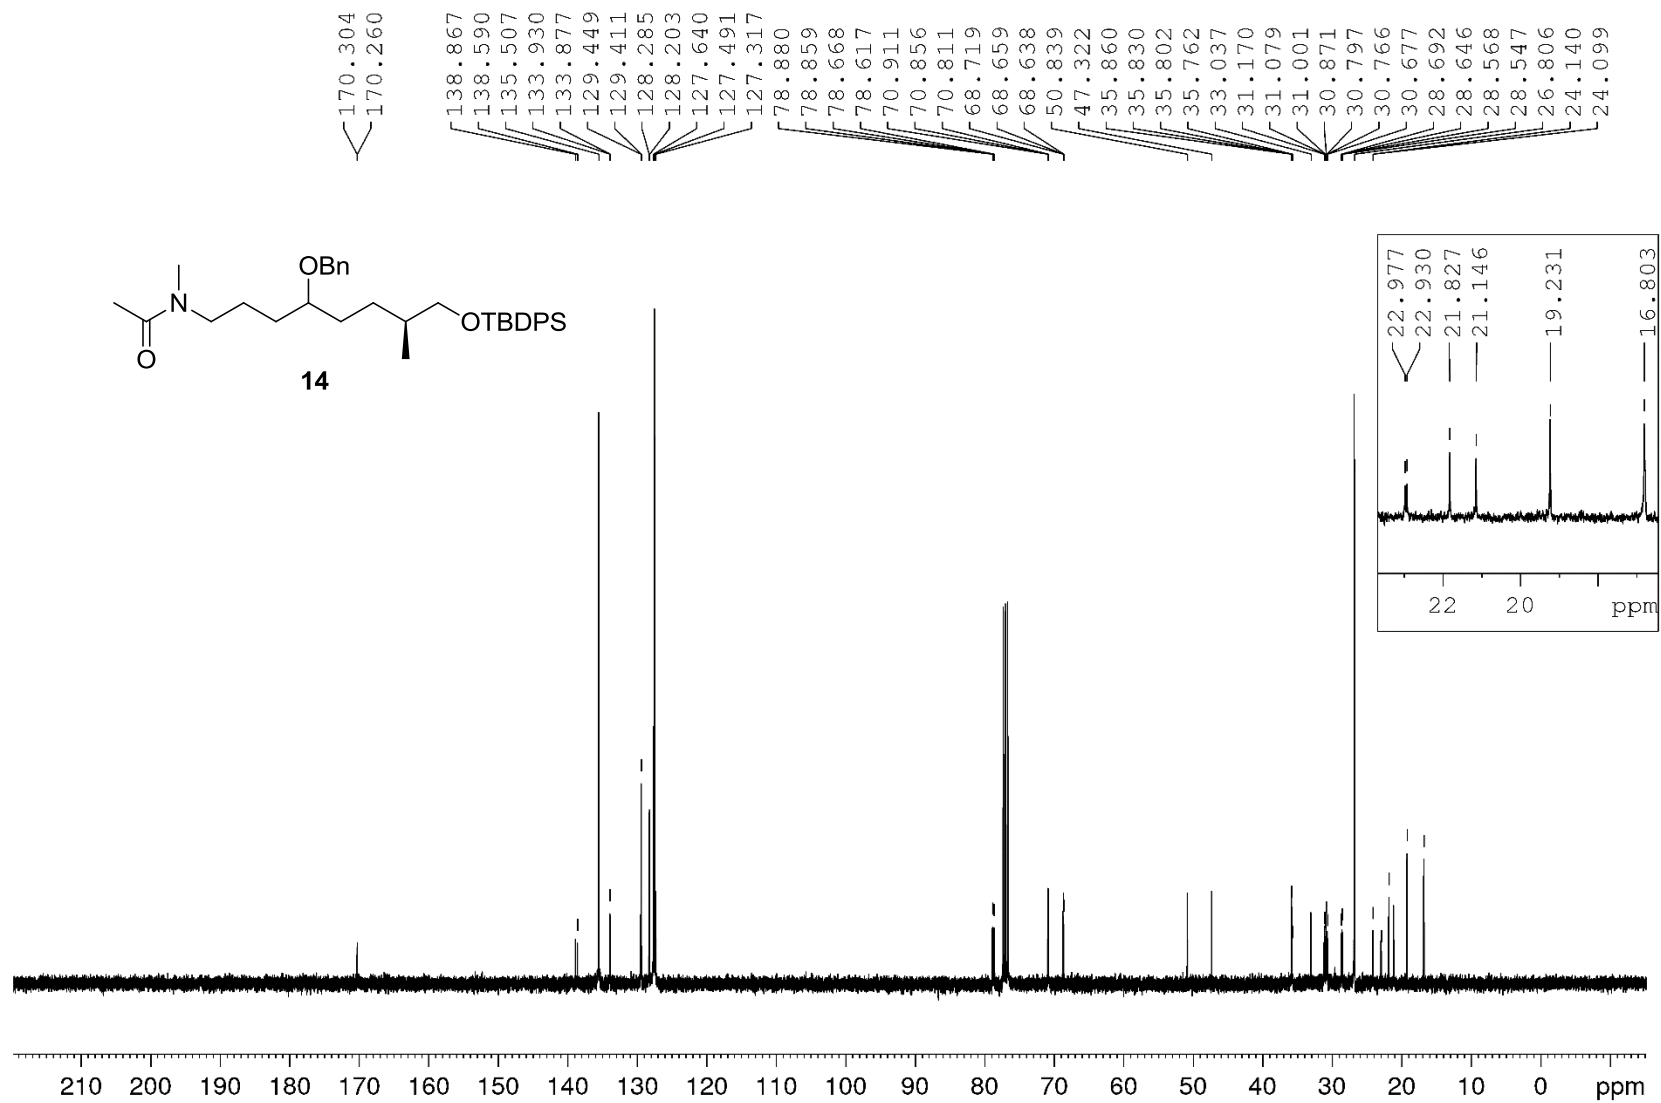

Figure S27.  $^{13}\text{C}$  NMR spectrum of compound **14** (CDCl<sub>3</sub>, 100 MHz)

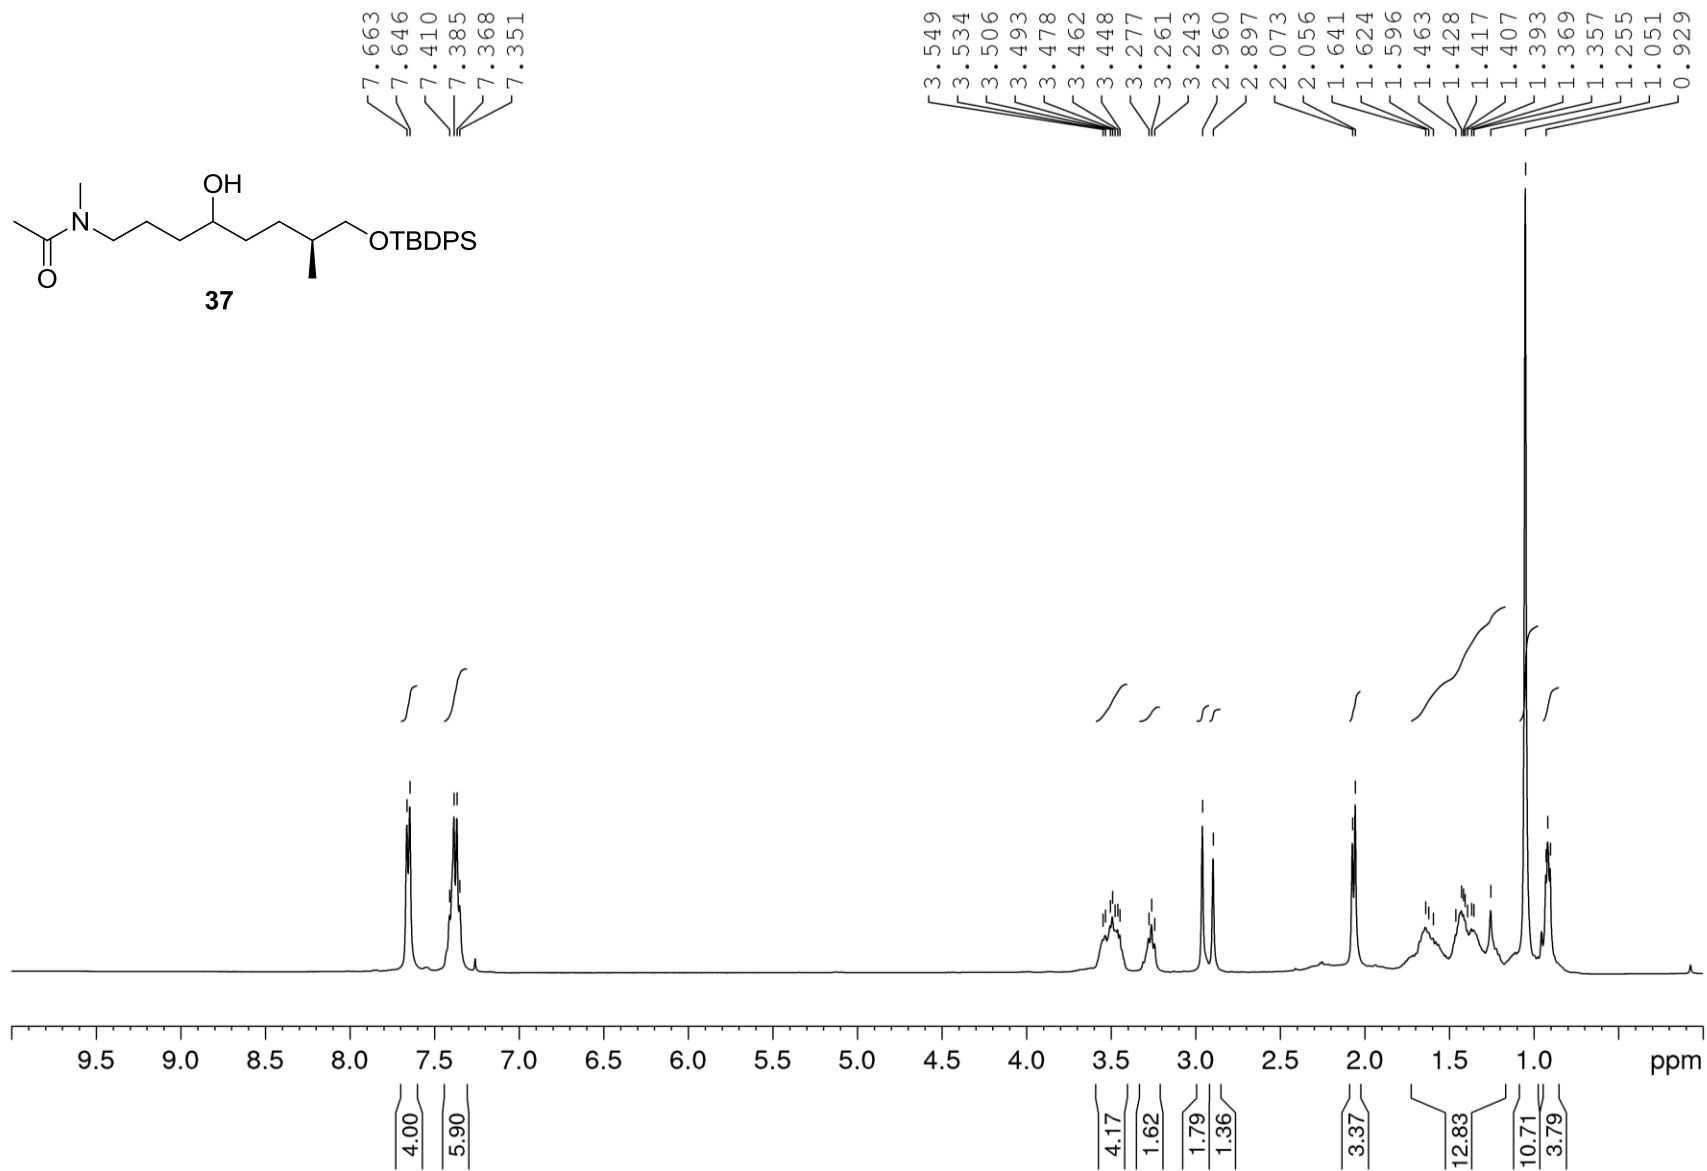

**Figure S28.**  $^1\text{H}$  NMR spectrum of compound **37** ( $\text{CDCl}_3$ , 400 MHz)

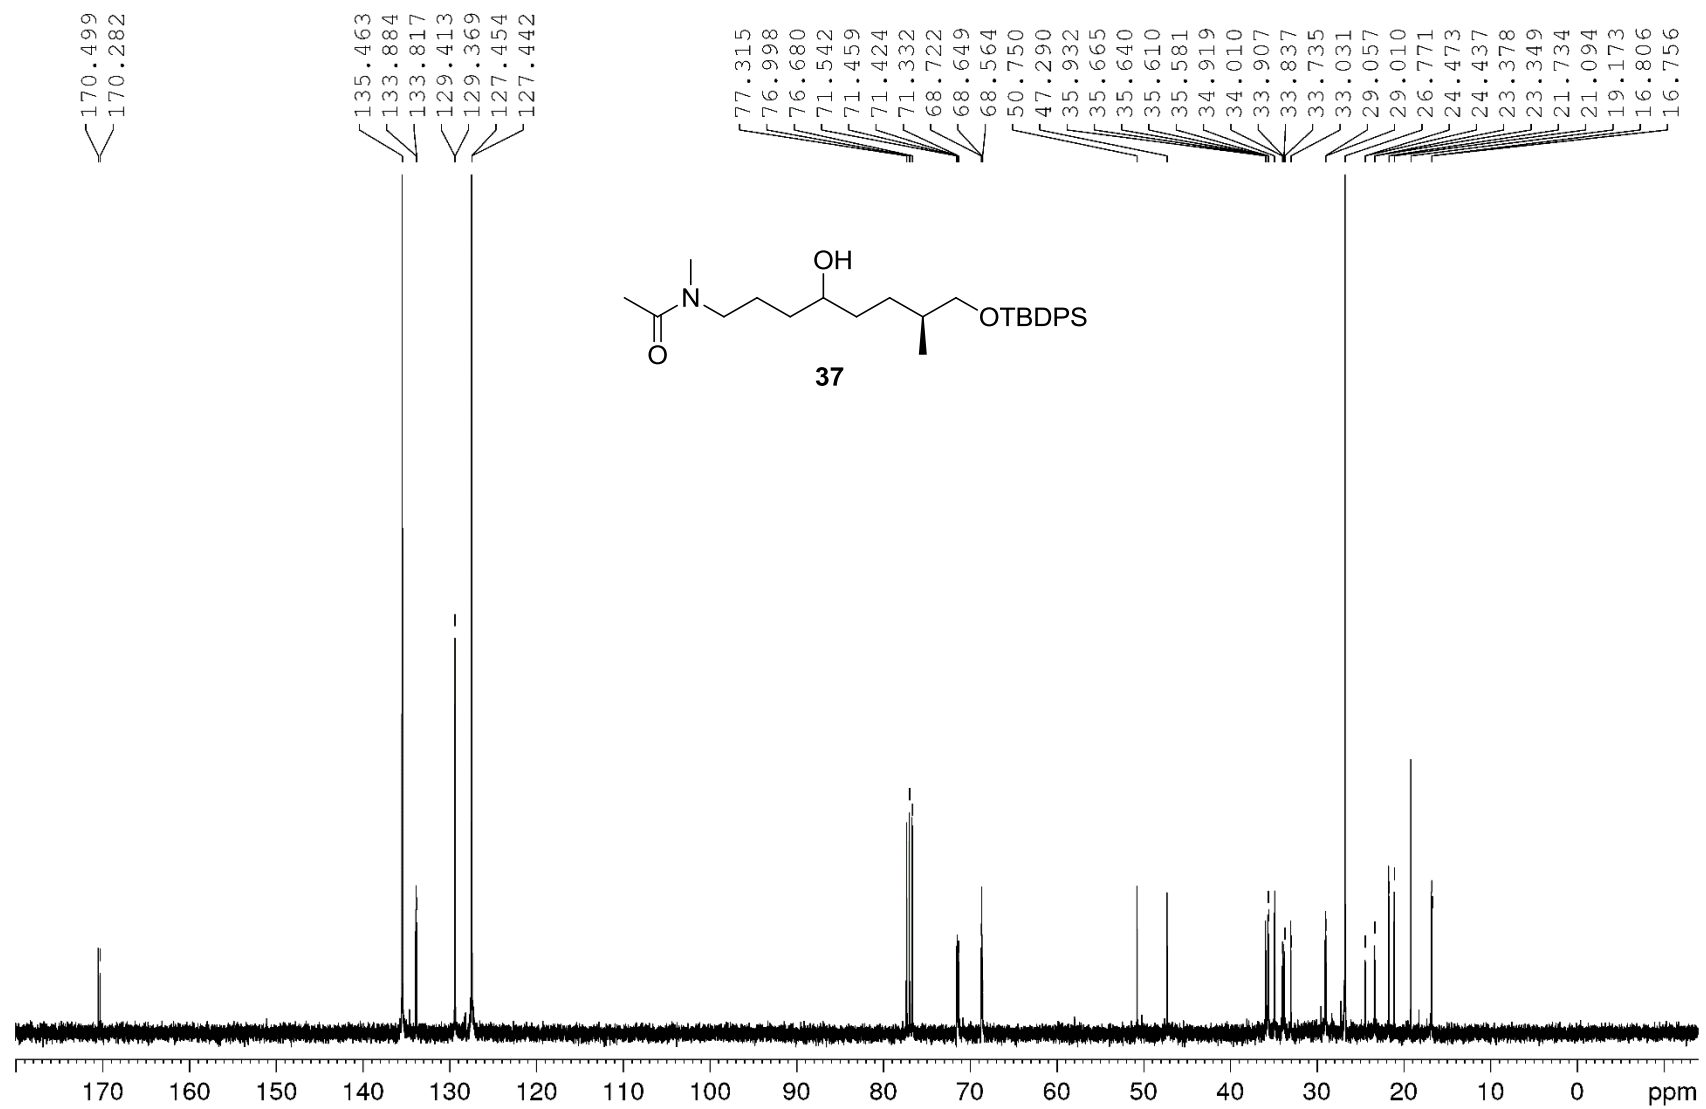

**Figure S29.** <sup>13</sup>C NMR spectrum of compound **37** (CDCl<sub>3</sub>, 100 MHz)

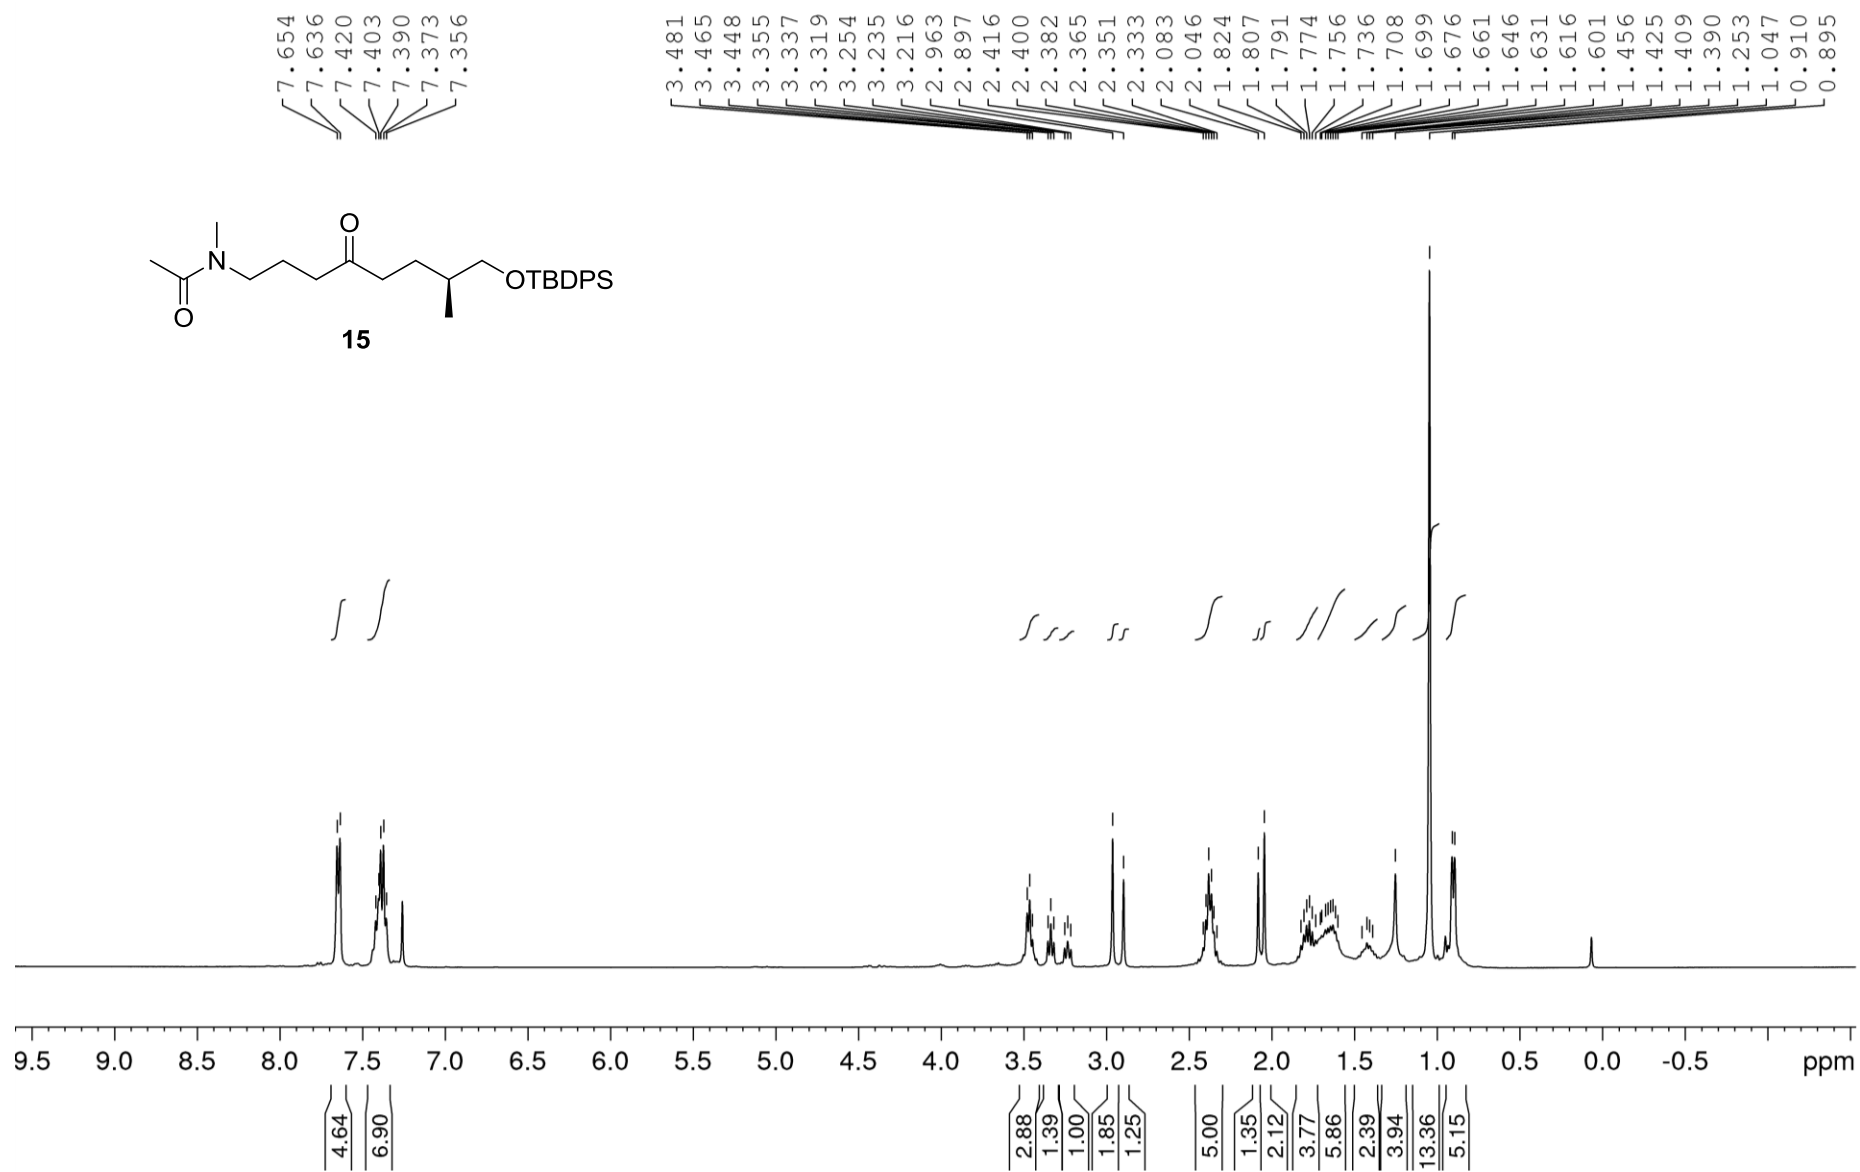

**Figure S30.**  $^1\text{H}$  NMR spectrum of compound **15** ( $\text{CDCl}_3$ , 400 MHz)



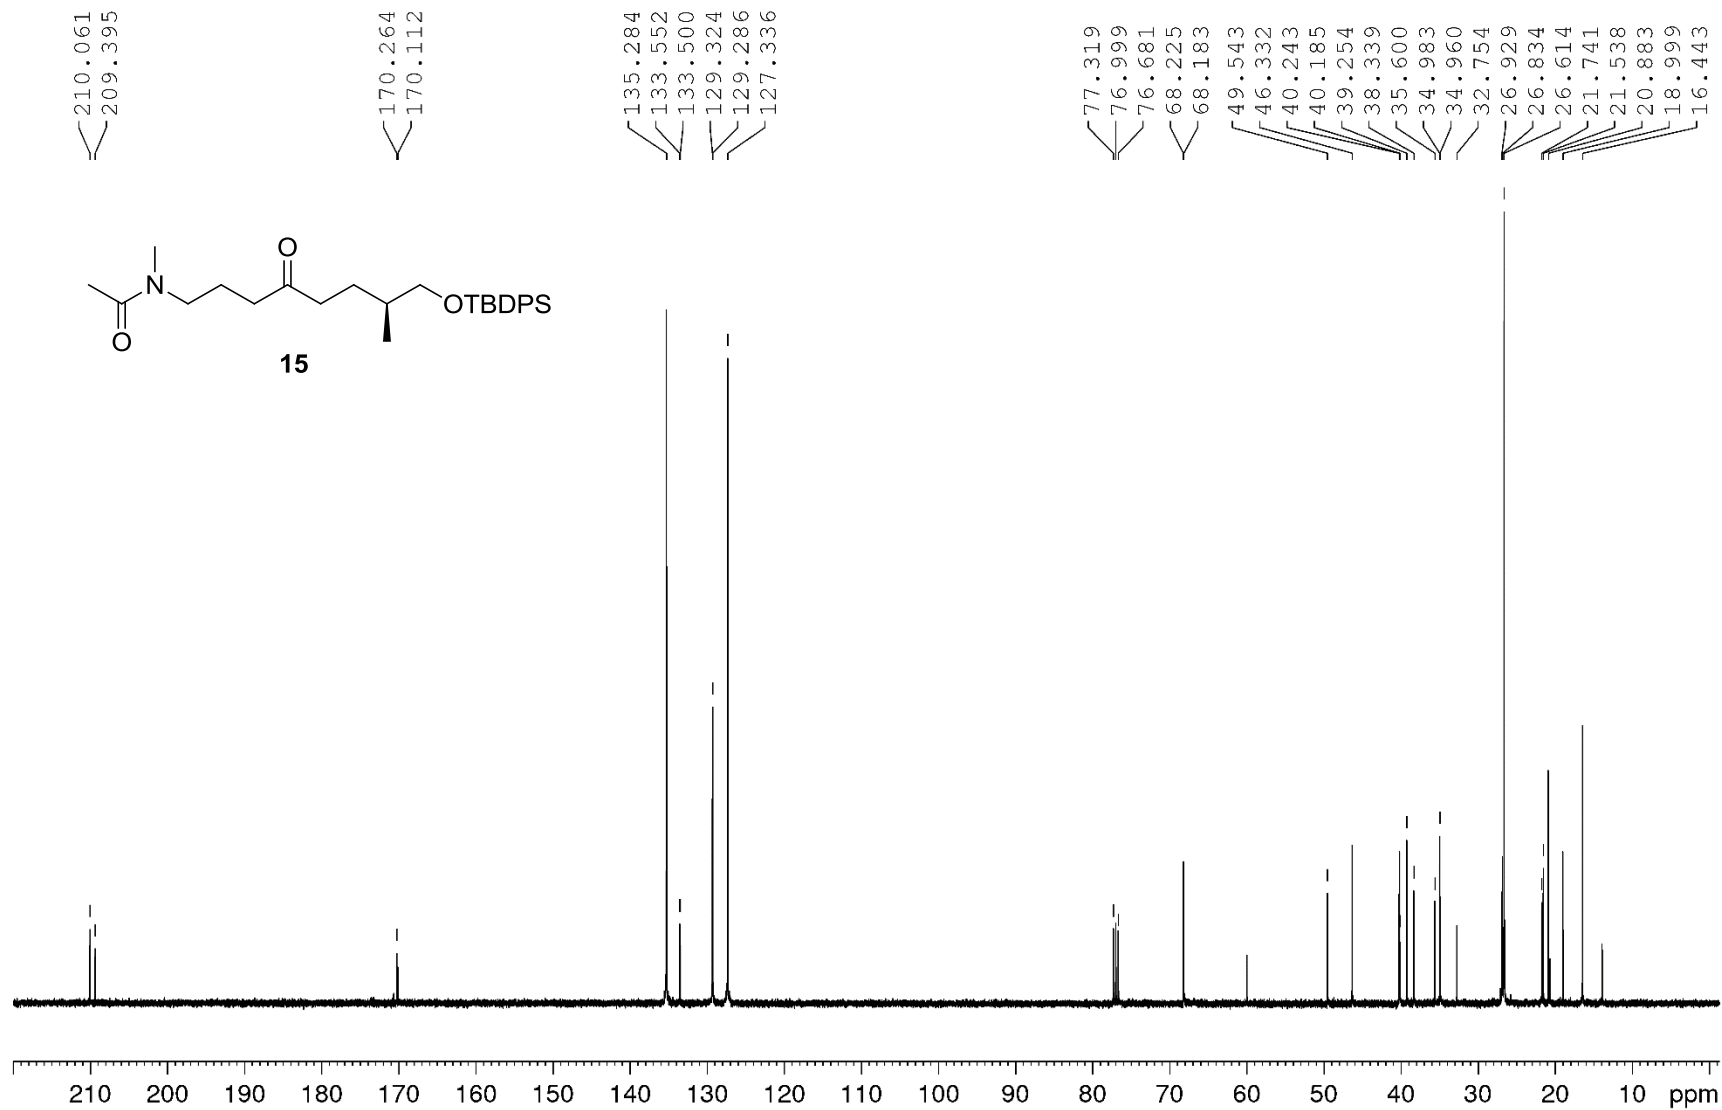

**Figure S31.**  $^{13}\text{C}$  NMR spectrum of compound **15** (CDCl<sub>3</sub>, 100 MHz)

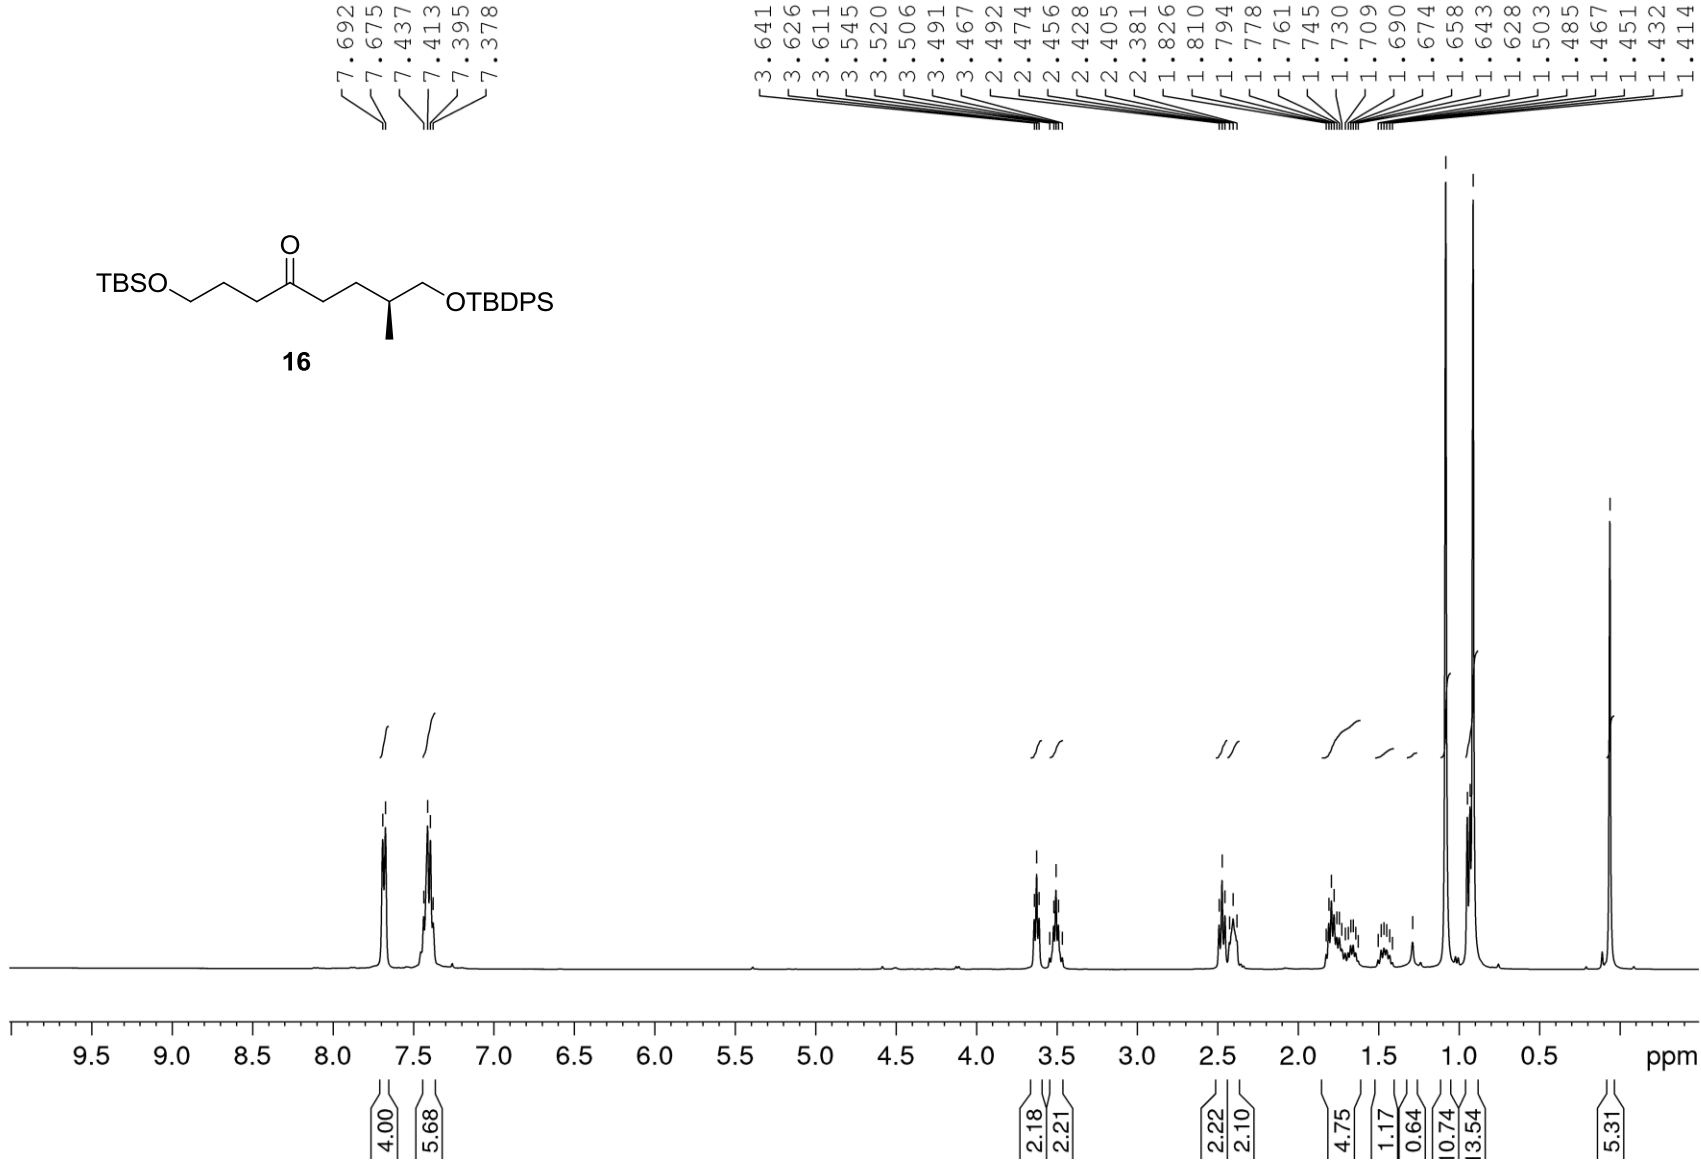

**Figure S32.** <sup>1</sup>H NMR spectrum of compound **16** (CDCl<sub>3</sub>, 400 MHz)

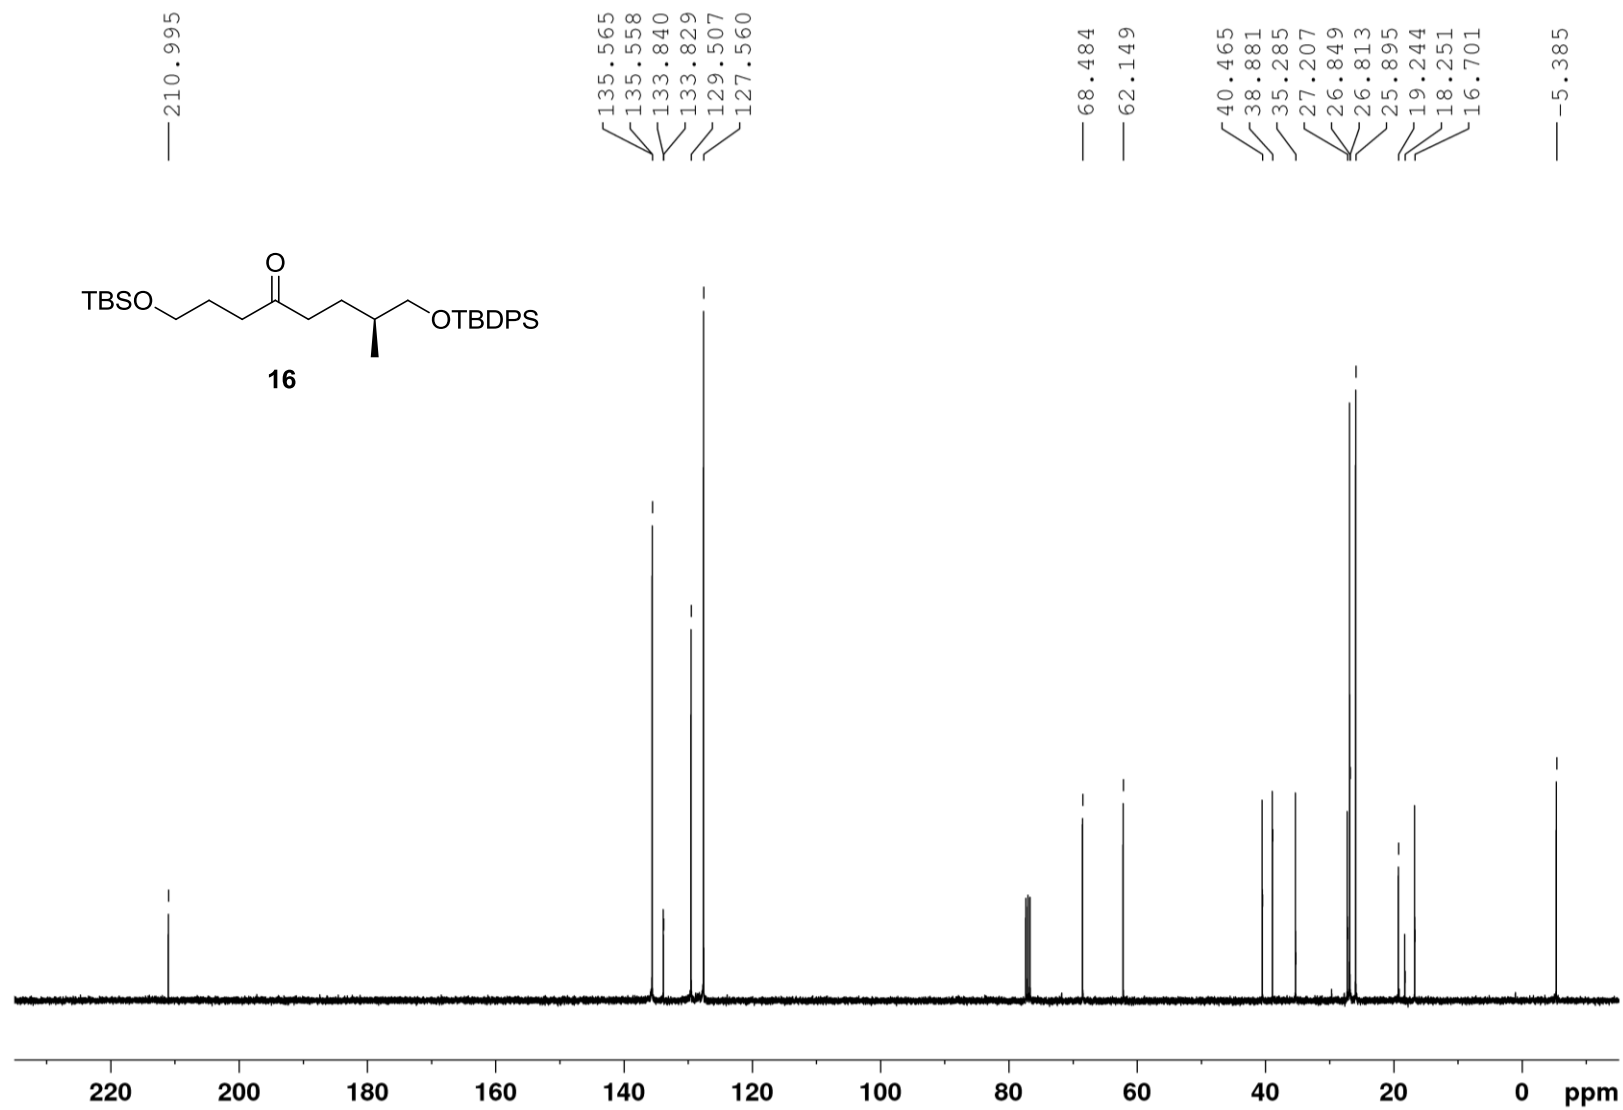

Figure S33.  $^{13}\text{C}$  NMR spectrum of compound **16** (CDCl<sub>3</sub>, 100 MHz)

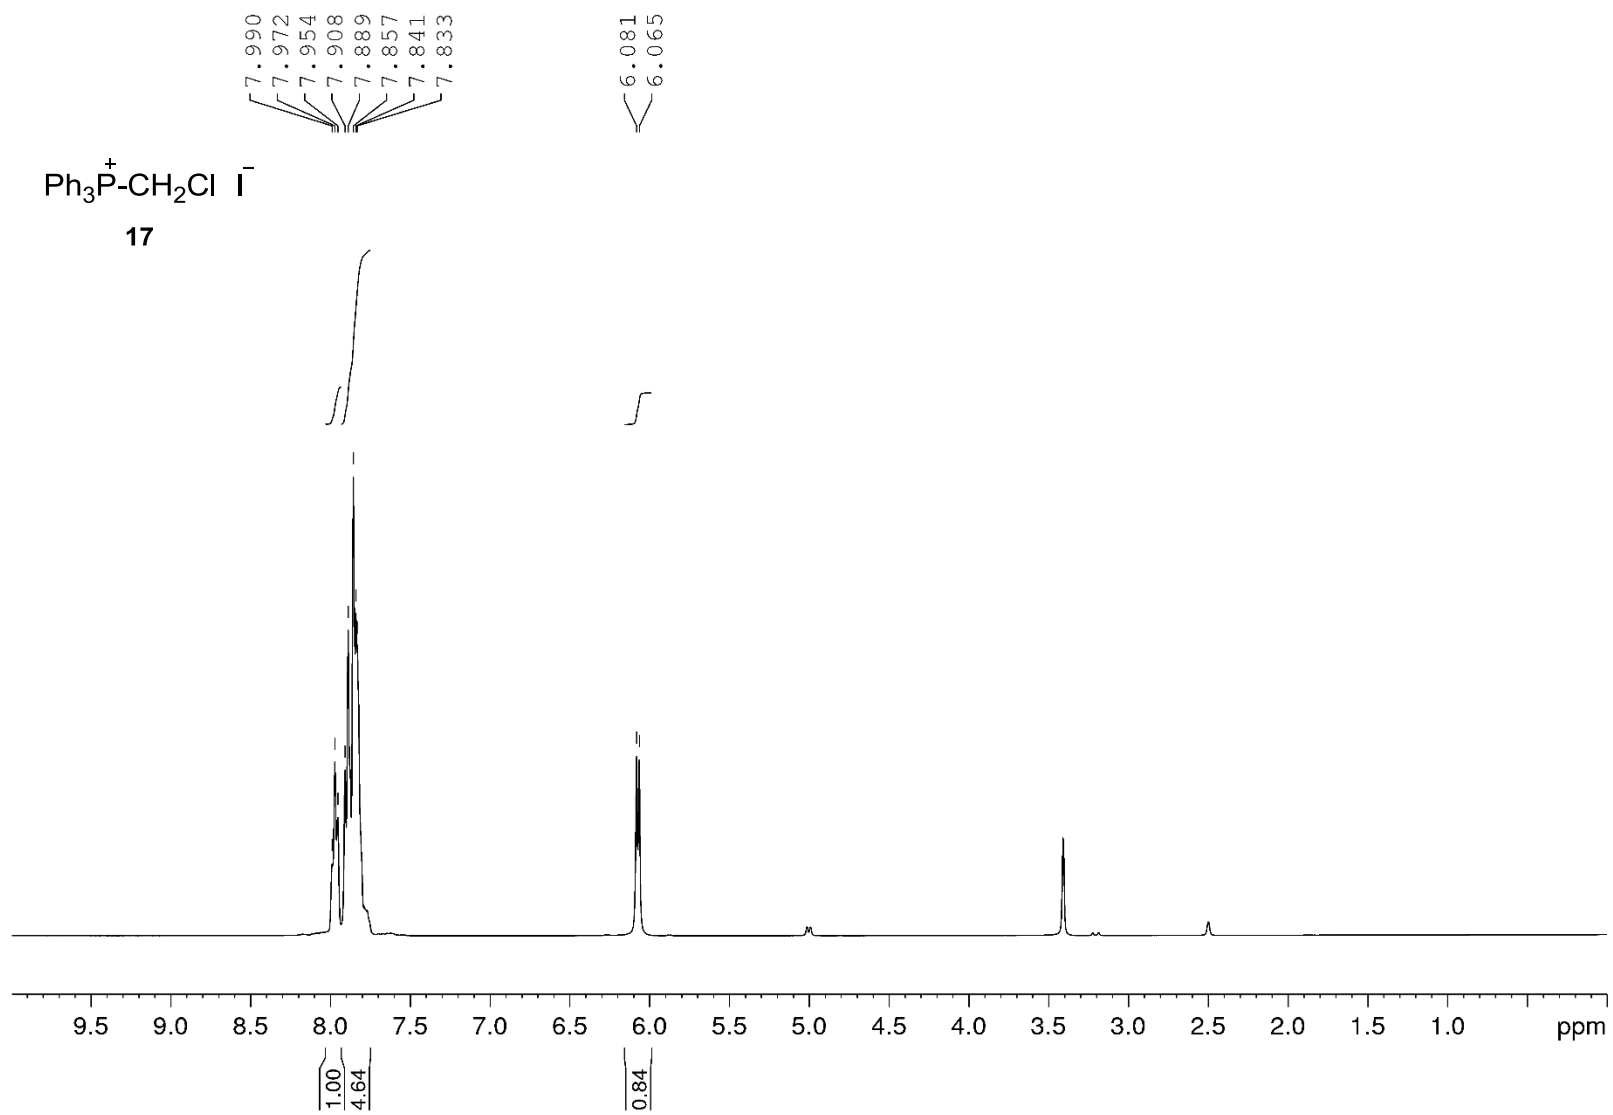

**Figure S34.**  $^1\text{H}$  NMR spectrum of compound **17** (DMSO, 400 MHz)

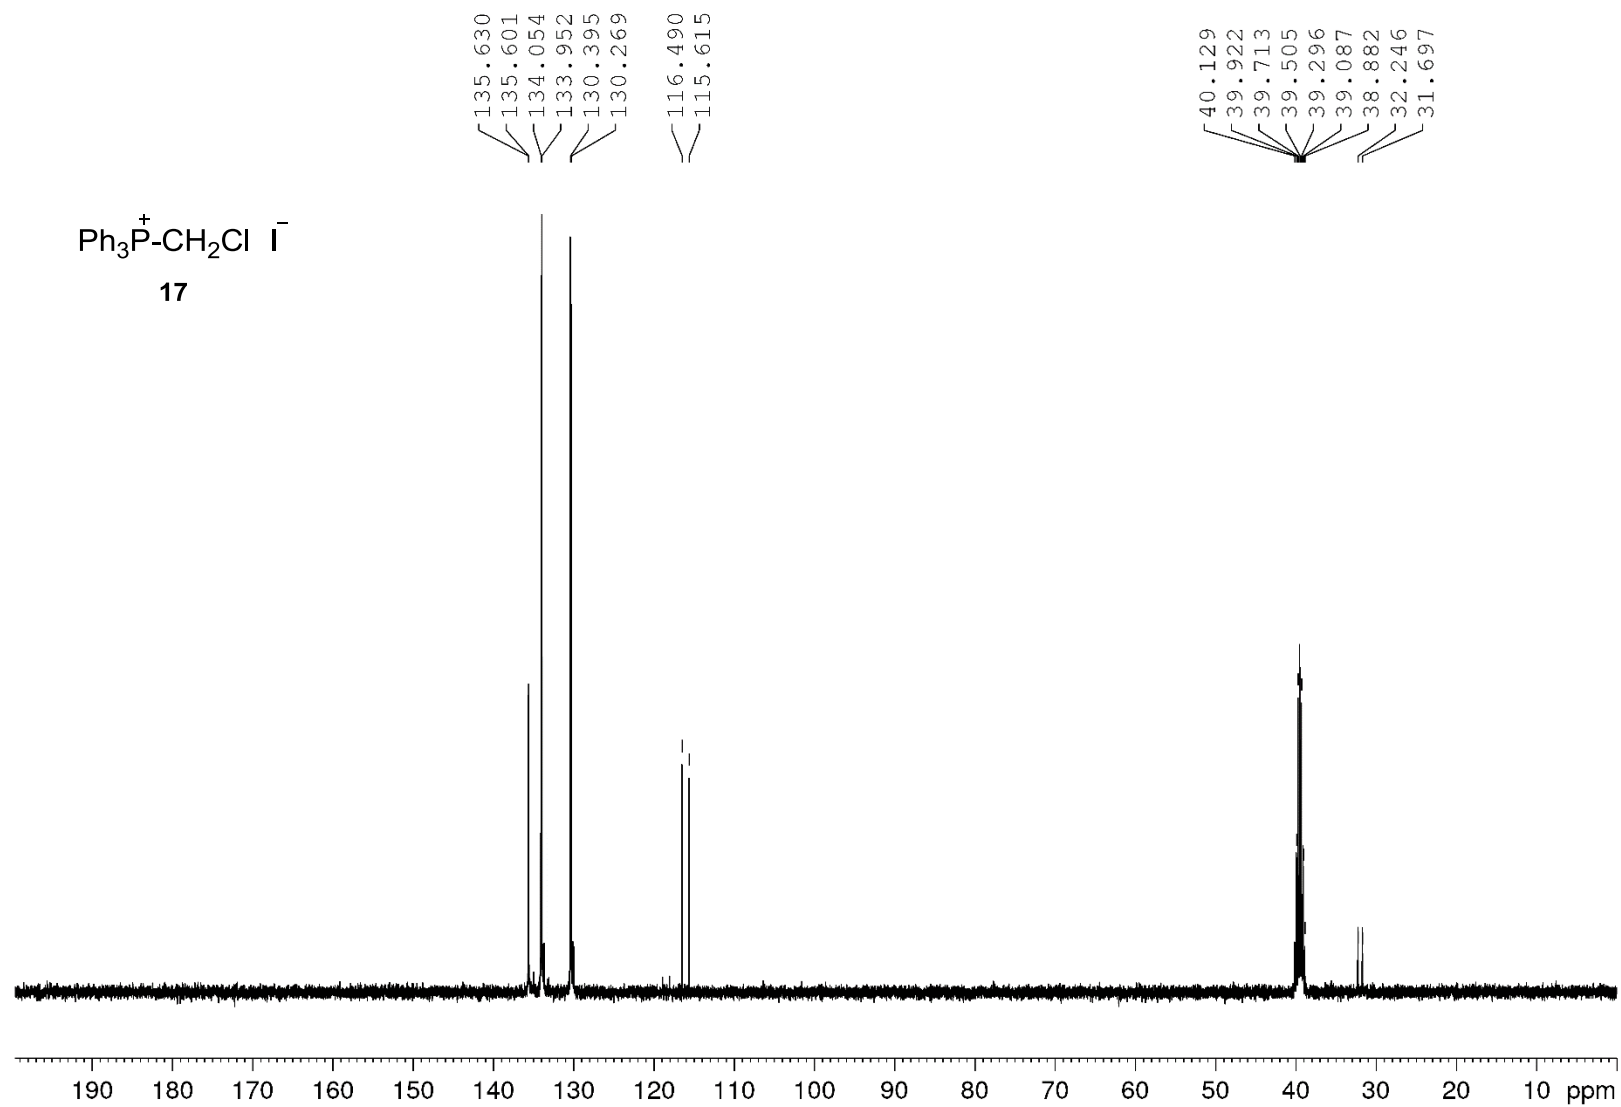

Figure S35.  $^{13}\text{C}$  NMR spectrum of compound **17** (DMSO, 100 MHz)



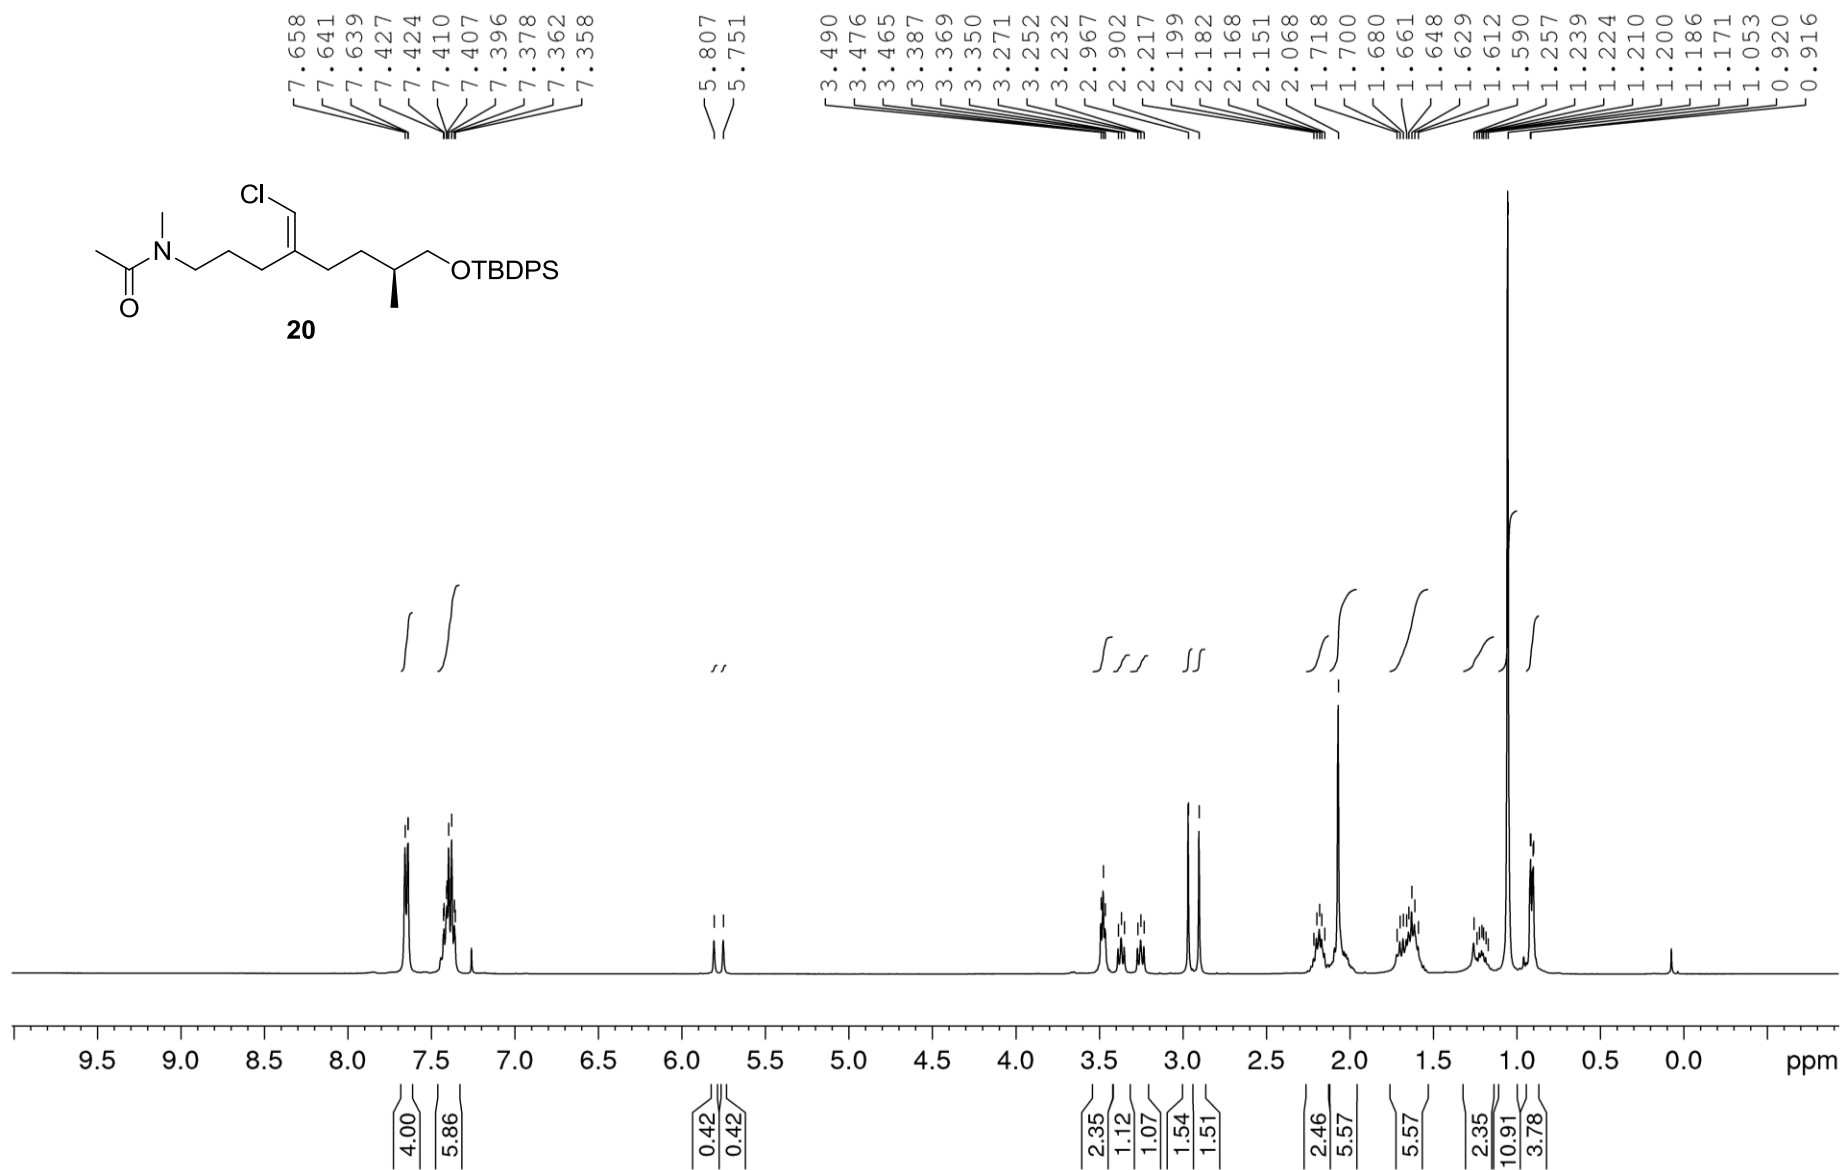

**Figure S37.**  $^1\text{H}$  NMR spectrum of compound **20** (CDCl<sub>3</sub>, 400 MHz)

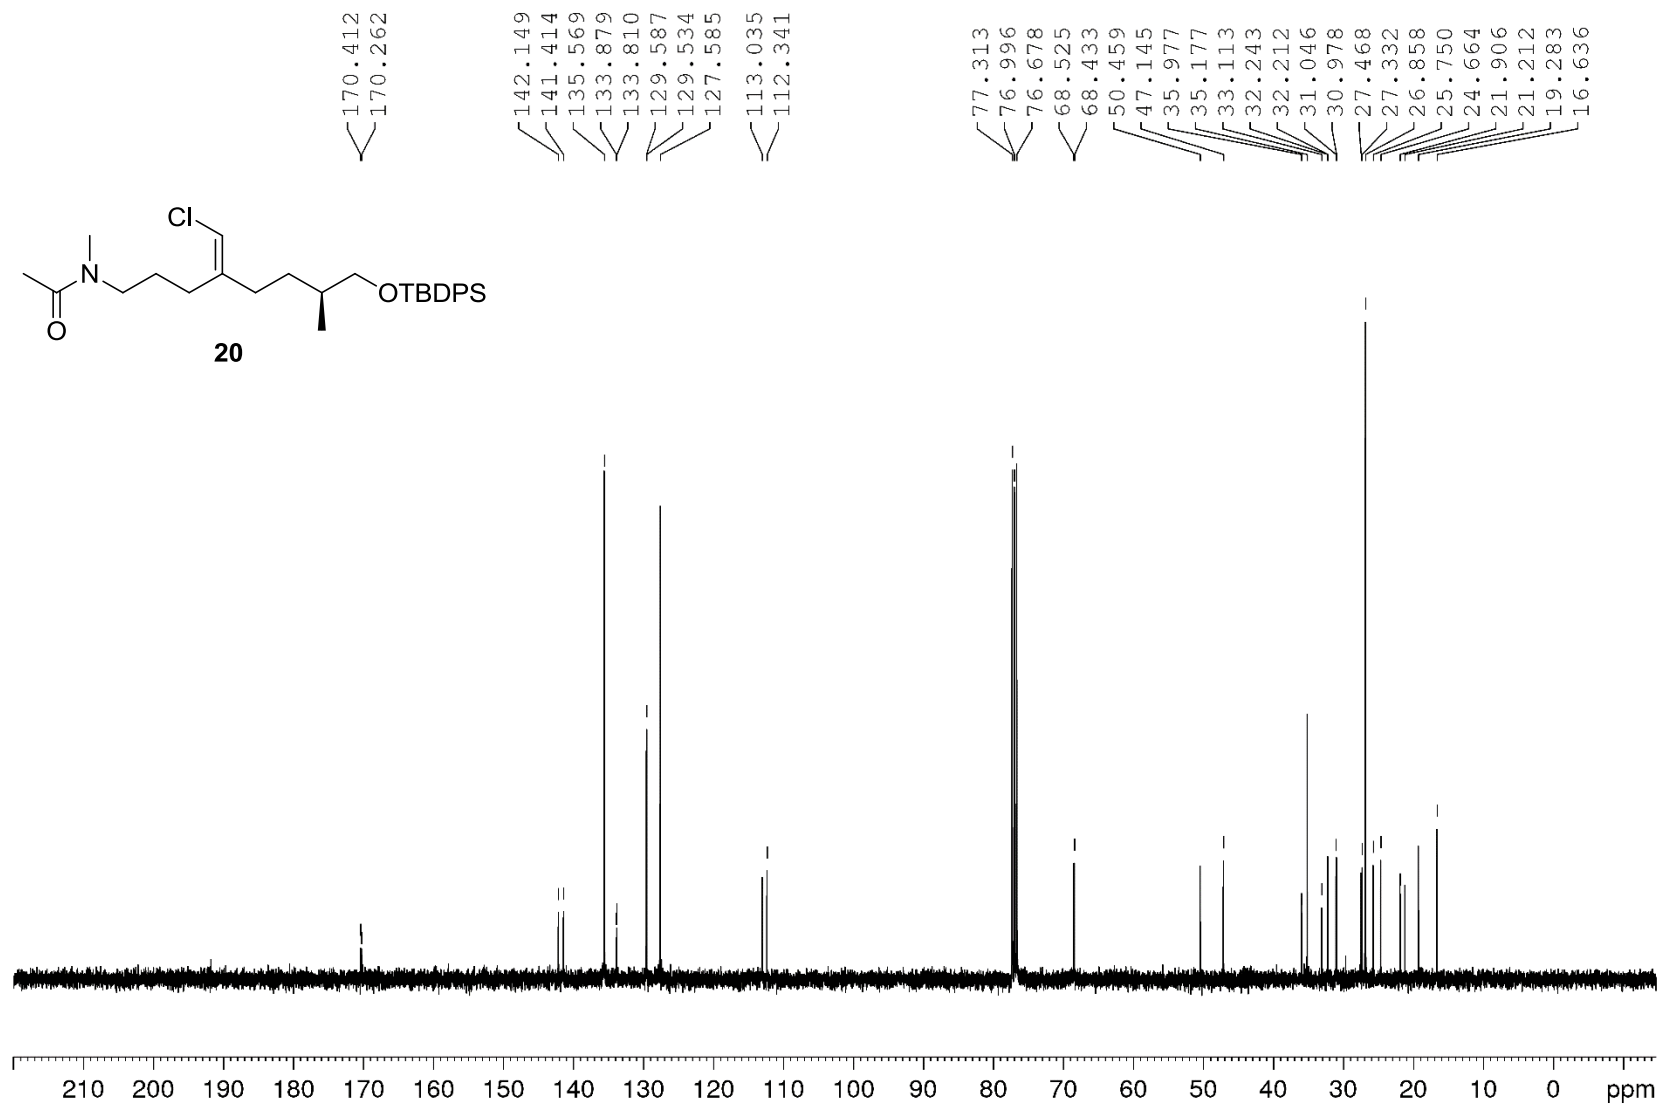

**Figure S38.**  $^{13}\text{C}$  NMR spectrum of compound **20** (CDCl<sub>3</sub>, 100 MHz)



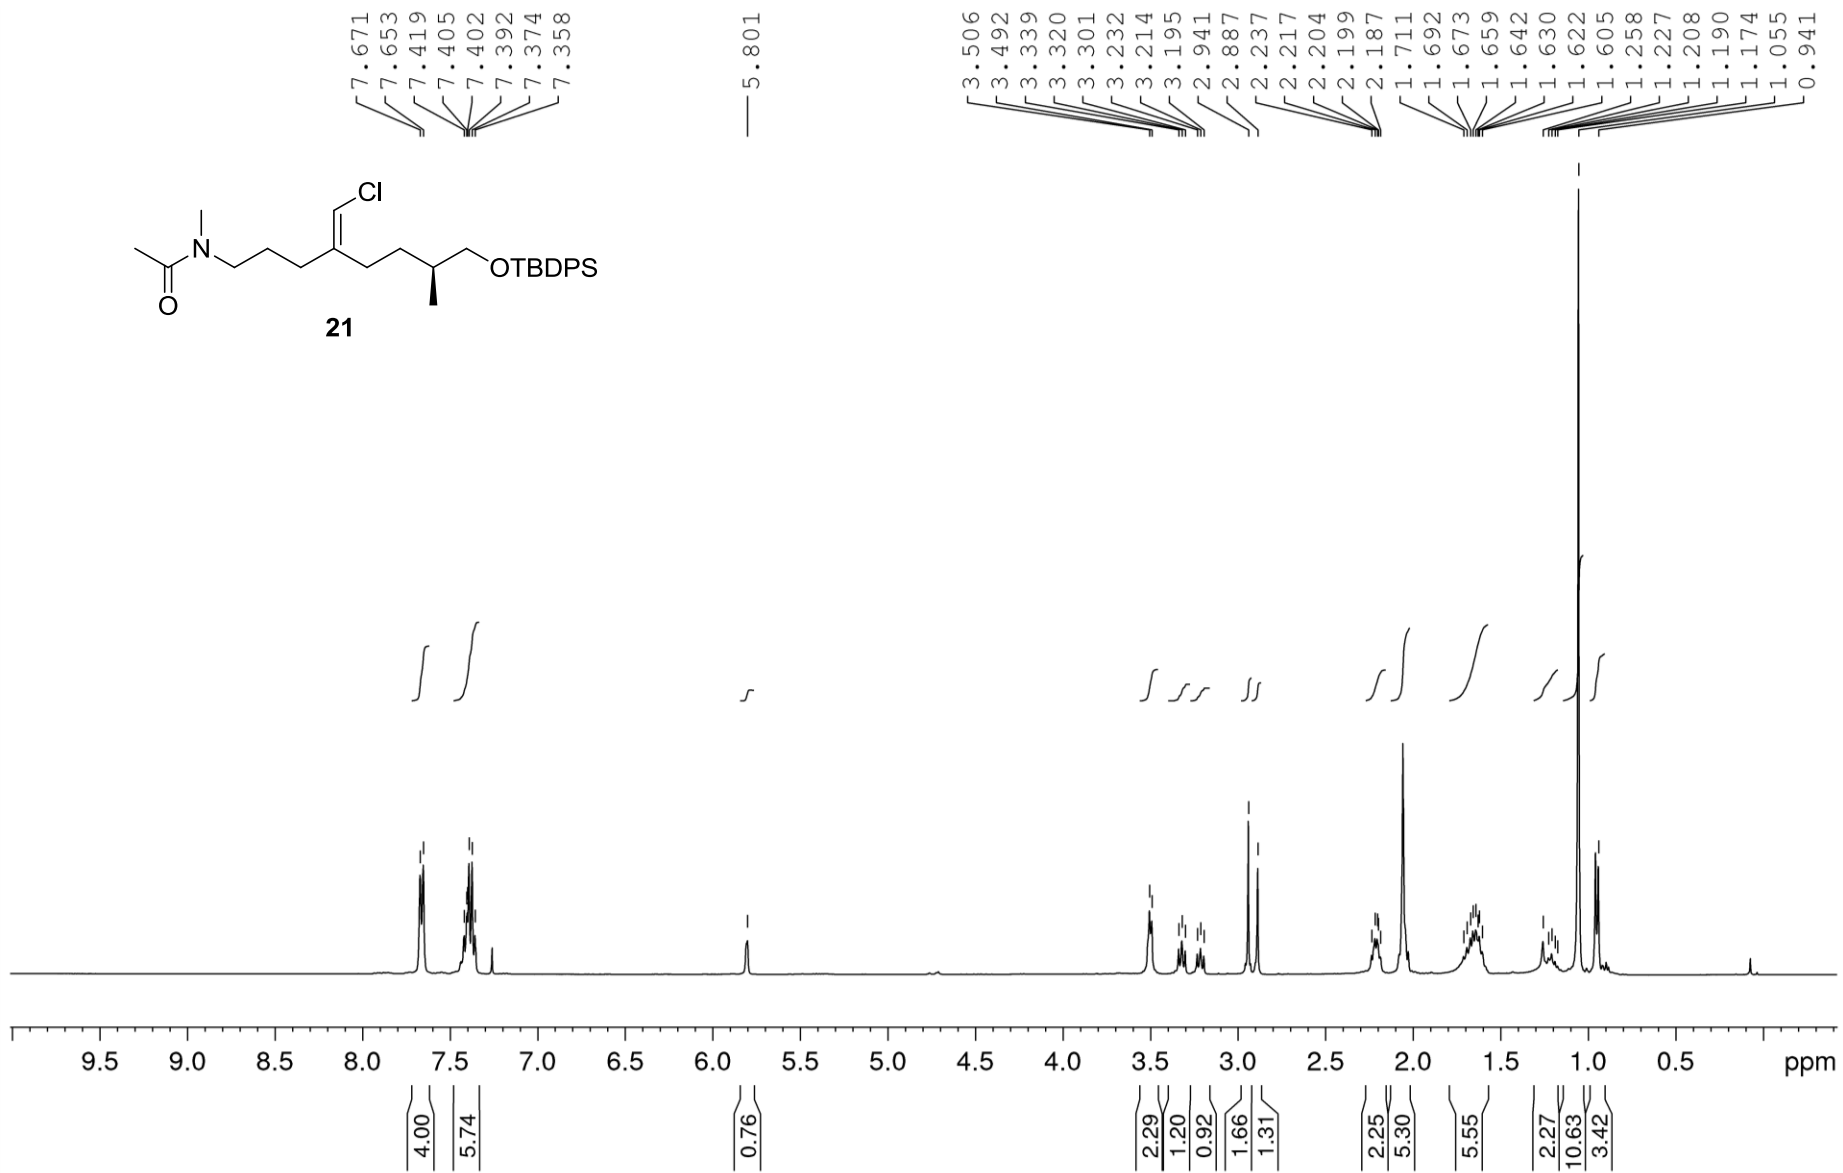

**Figure S39.**  $^1\text{H}$  NMR spectrum of compound **21** (CDCl<sub>3</sub>, 400 MHz)

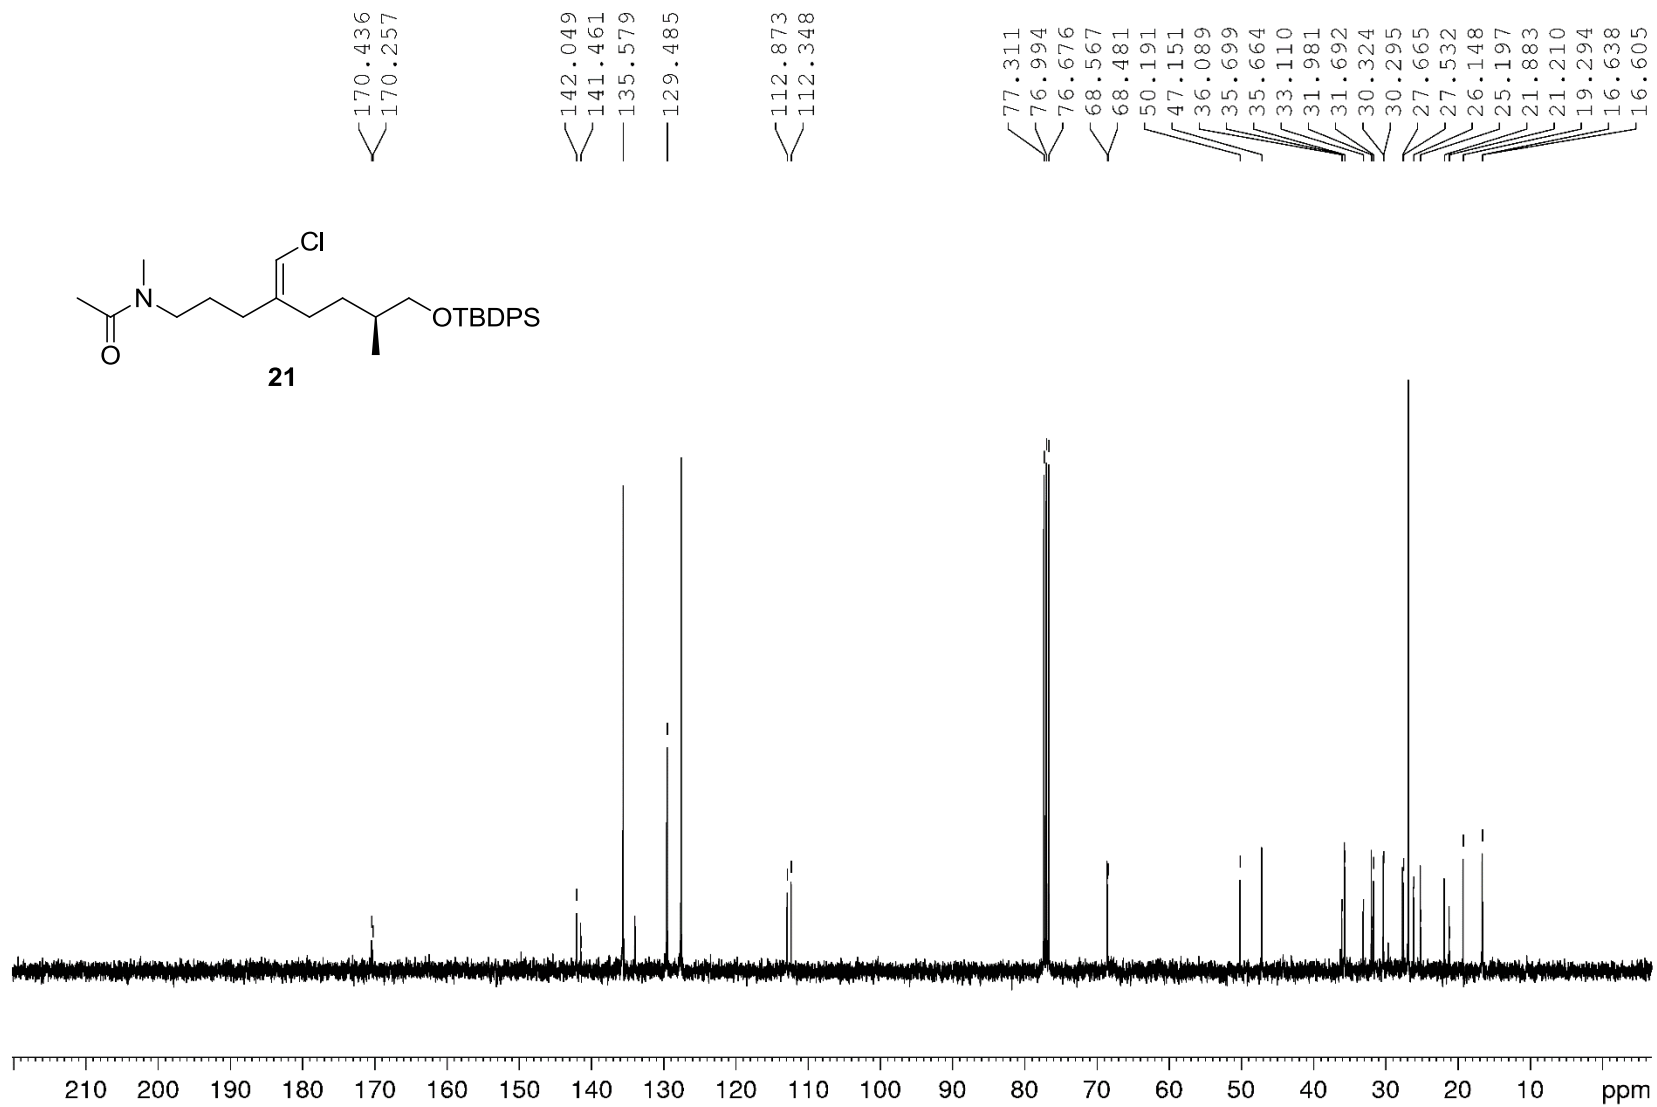

**Figure S40.**  $^{13}\text{C}$  NMR spectrum of compound **21** (CDCl<sub>3</sub>, 100 MHz)

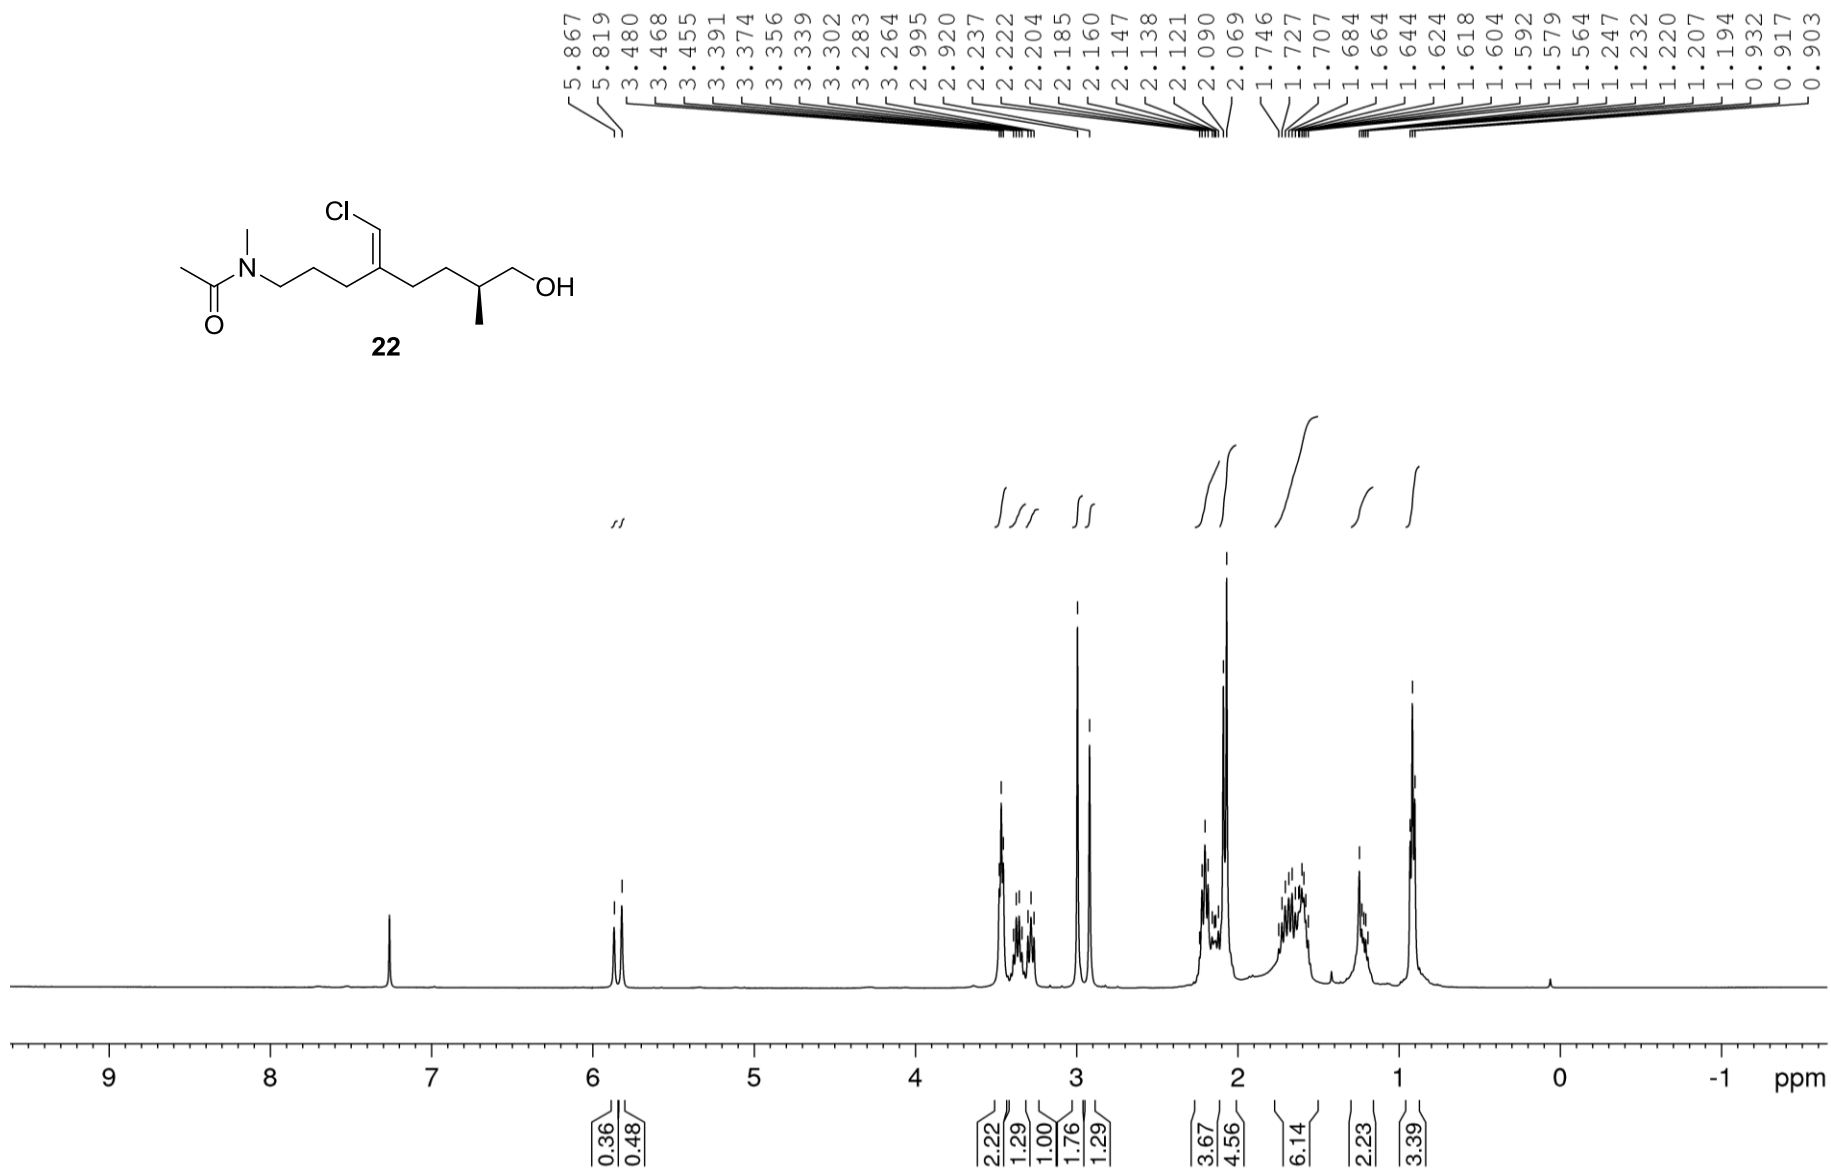

**Figure S41.** <sup>1</sup>H NMR spectrum of compound **22** (CDCl<sub>3</sub>, 400 MHz)

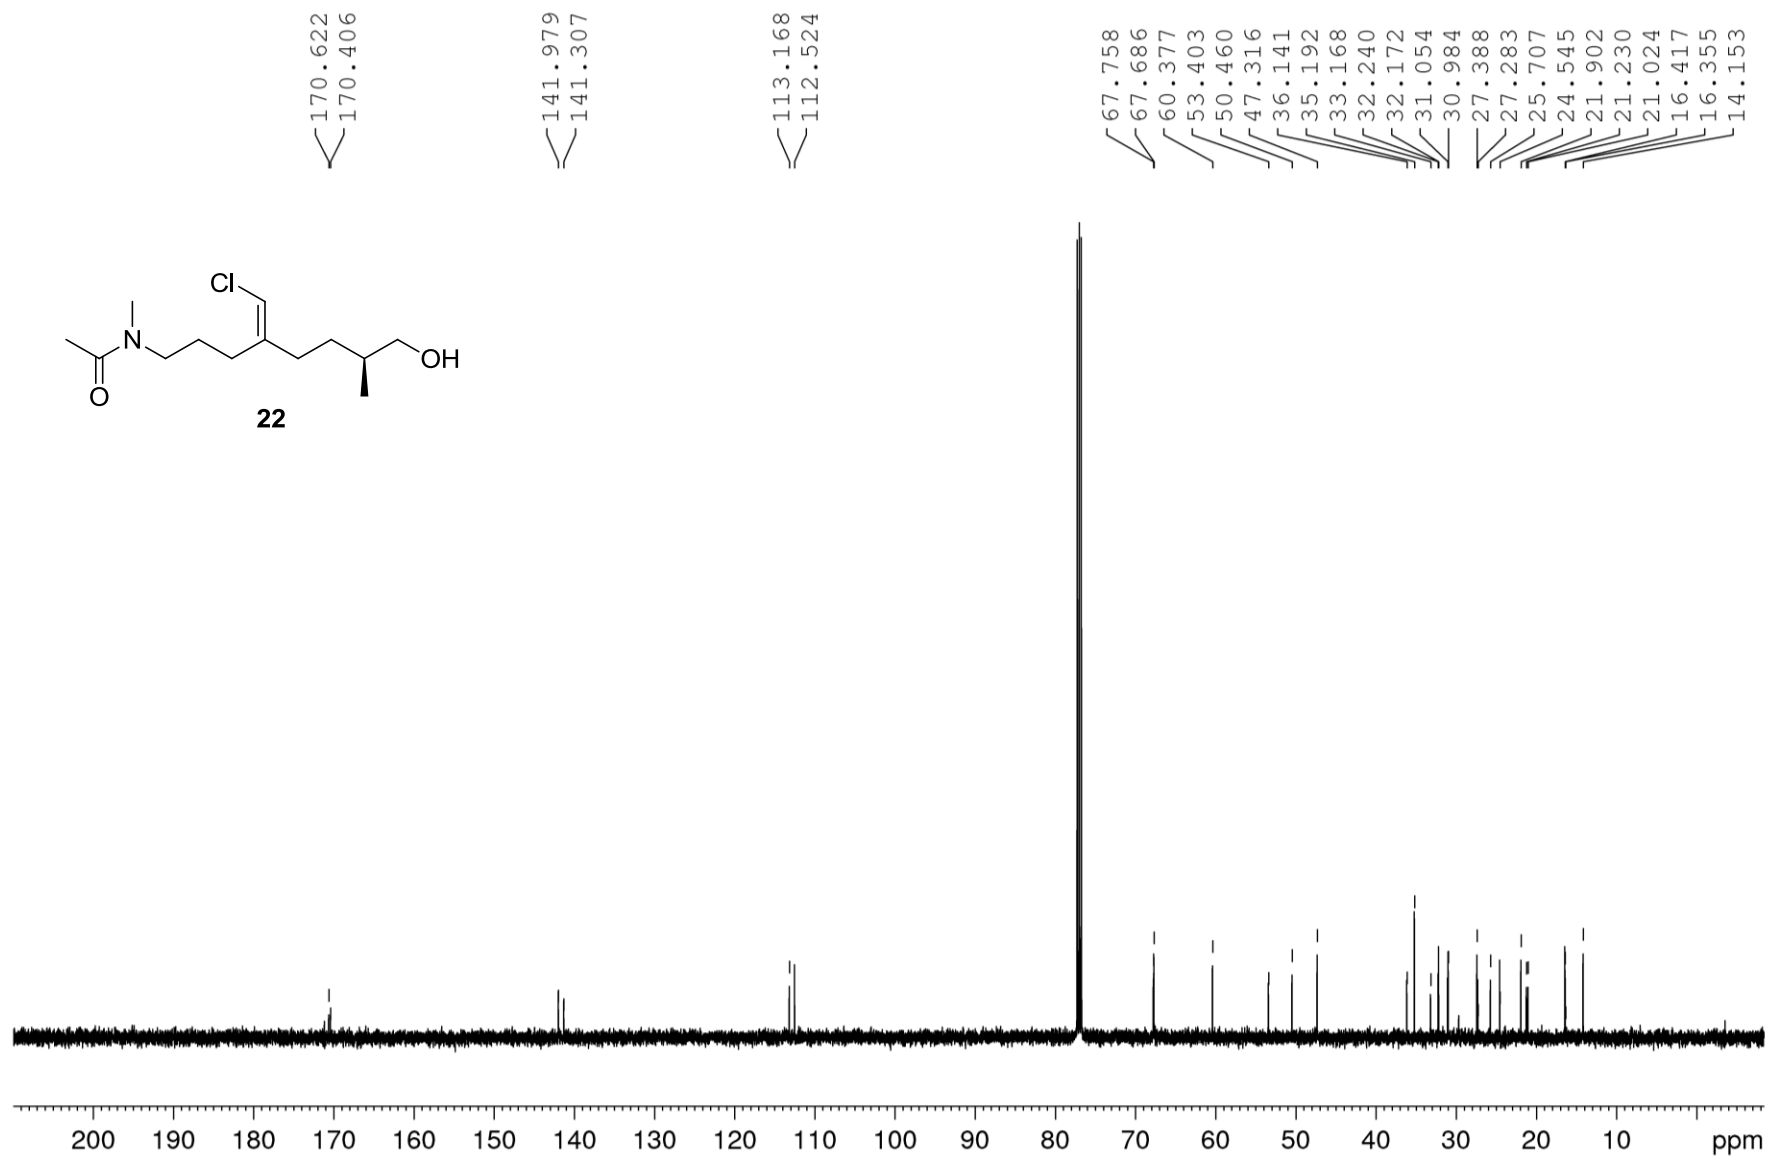

**Figure S42.**  $^{13}\text{C}$  NMR spectrum of compound **22** (CDCl<sub>3</sub>, 100 MHz)

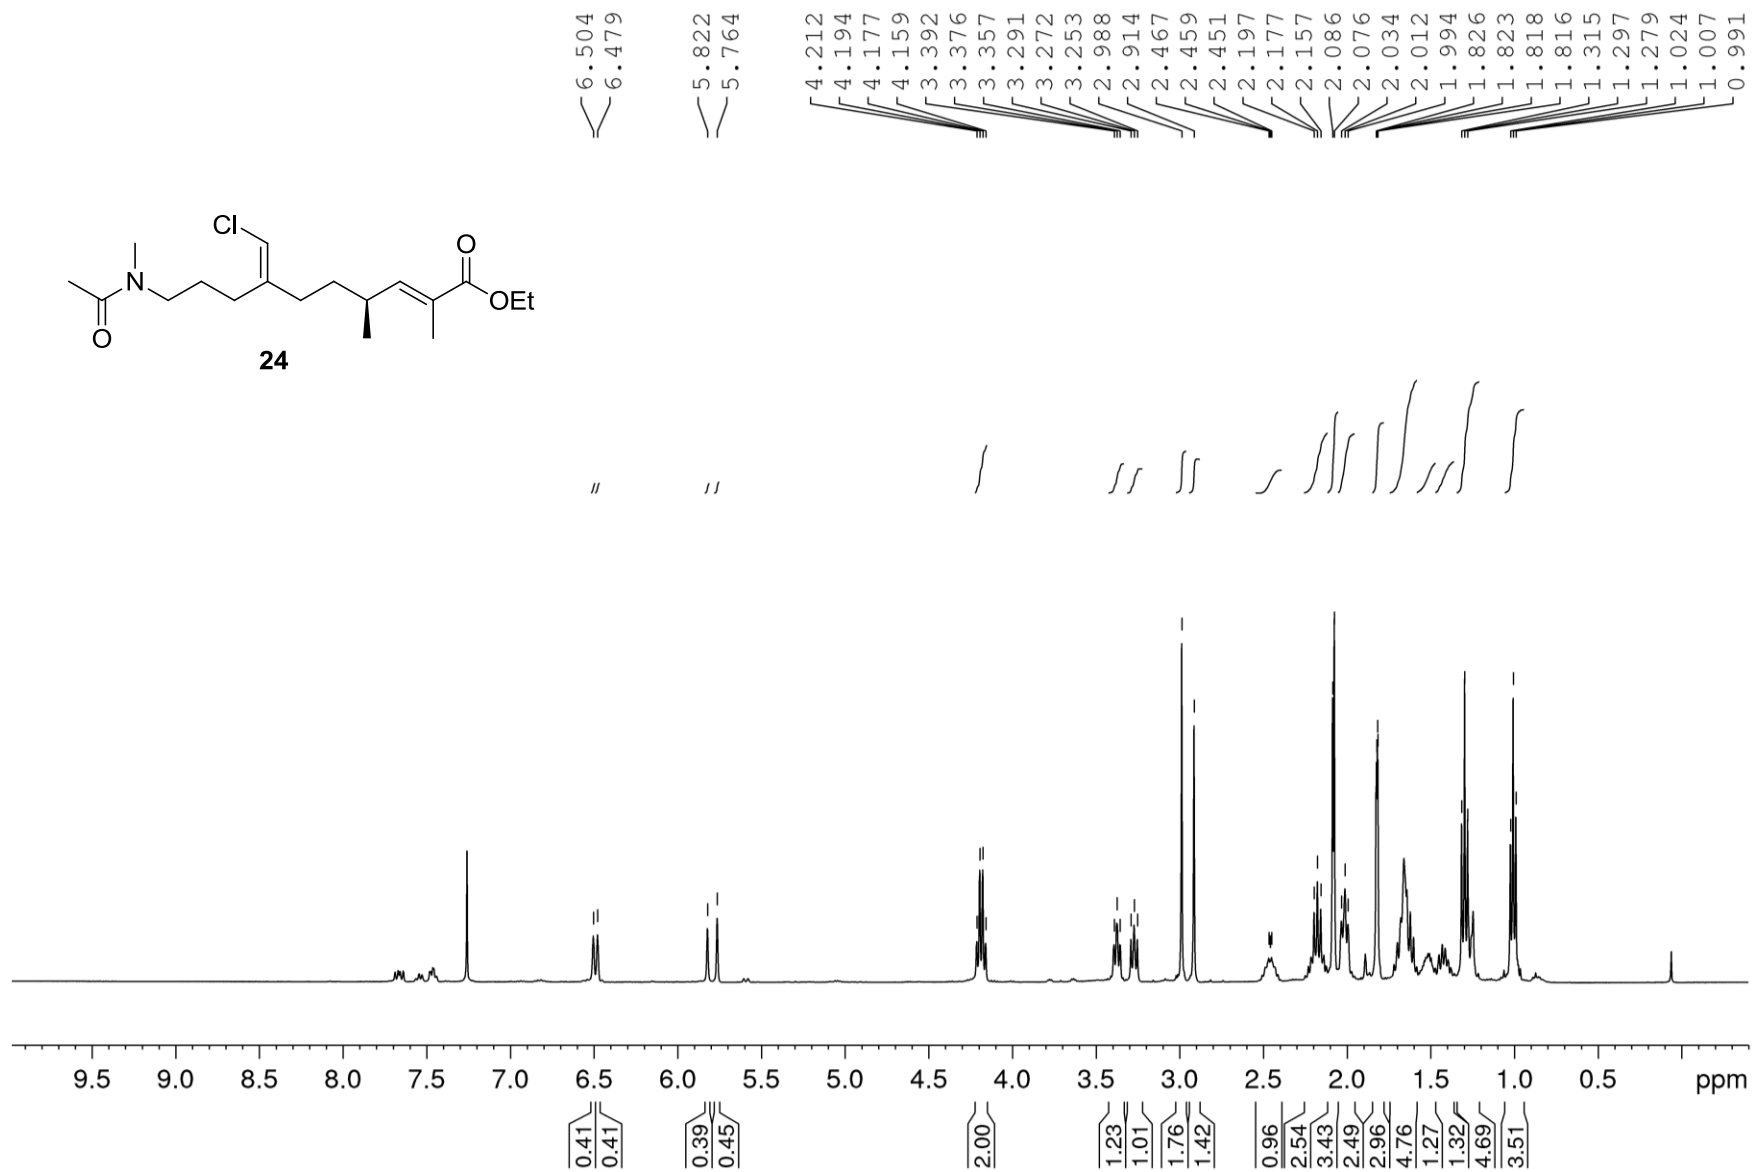

**Figure S43.** <sup>1</sup>H NMR spectrum of compound **24** (CDCl<sub>3</sub>, 400 MHz)

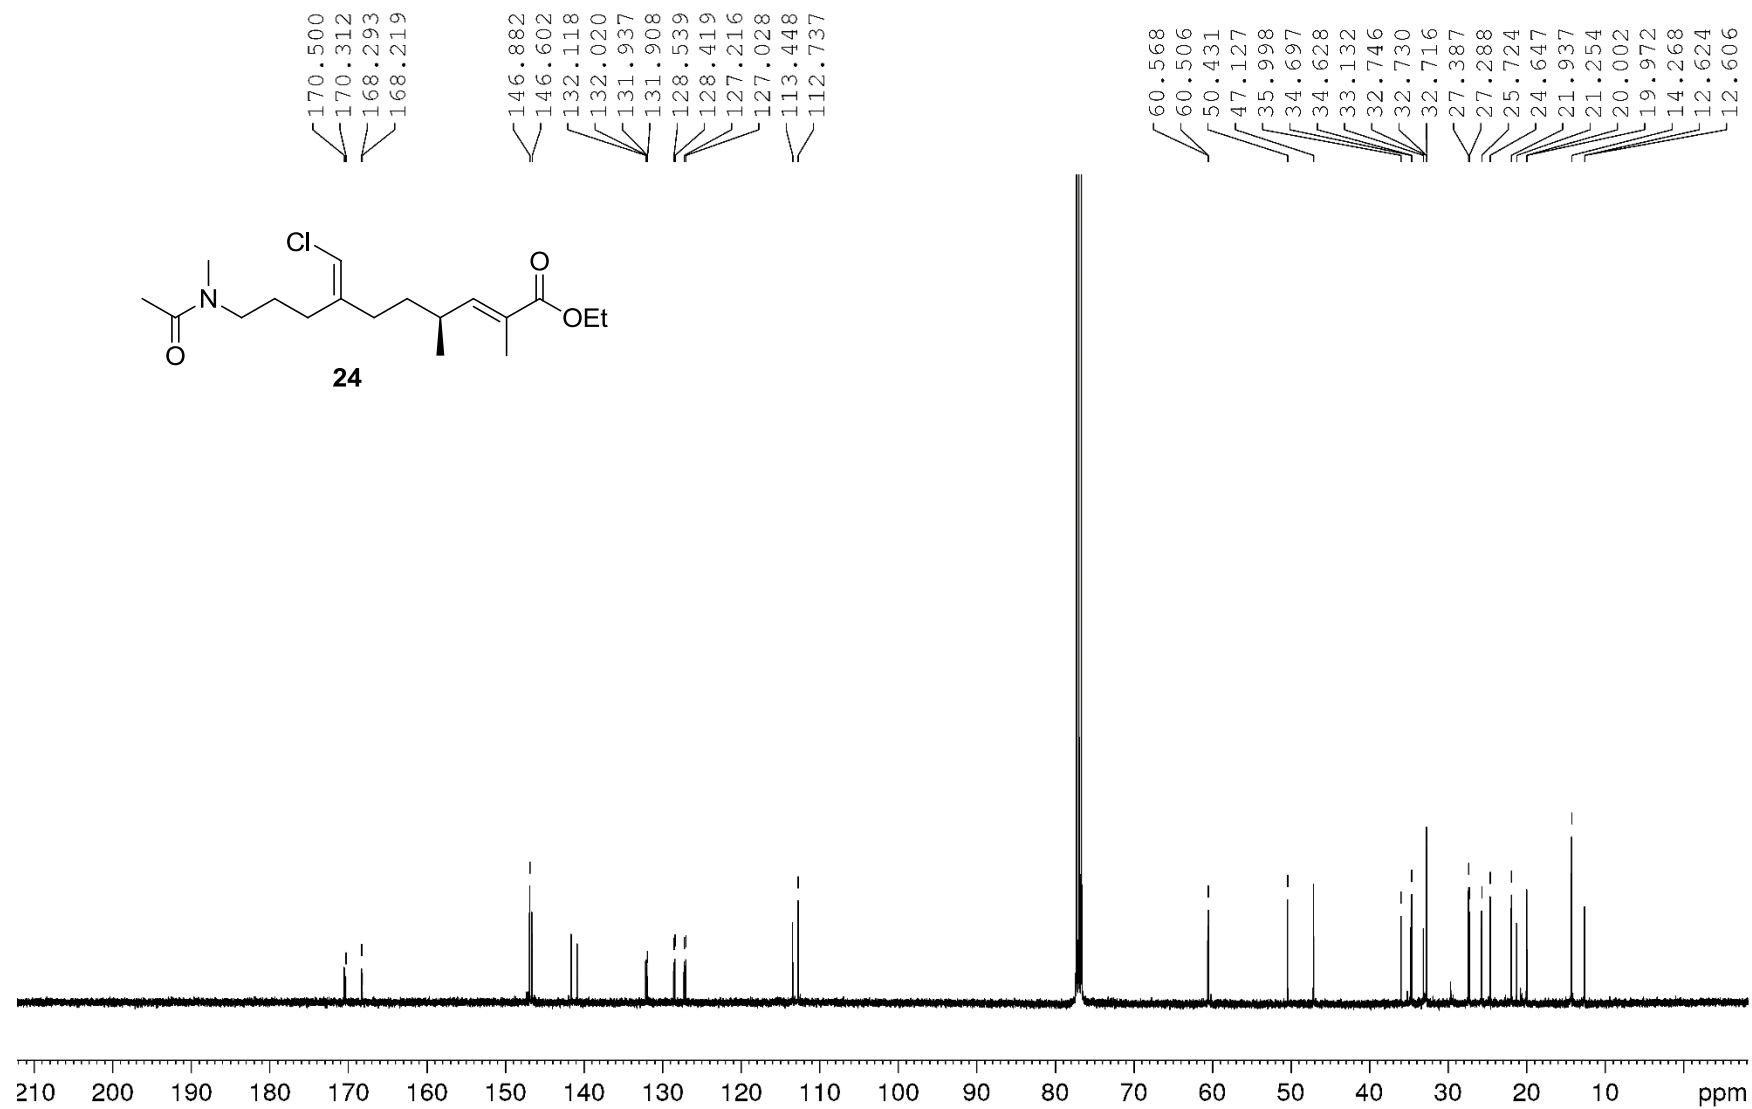

**Figure S44.**  $^{13}\text{C}$  NMR spectrum of compound **24** ( $\text{CDCl}_3$ , 100 MHz)

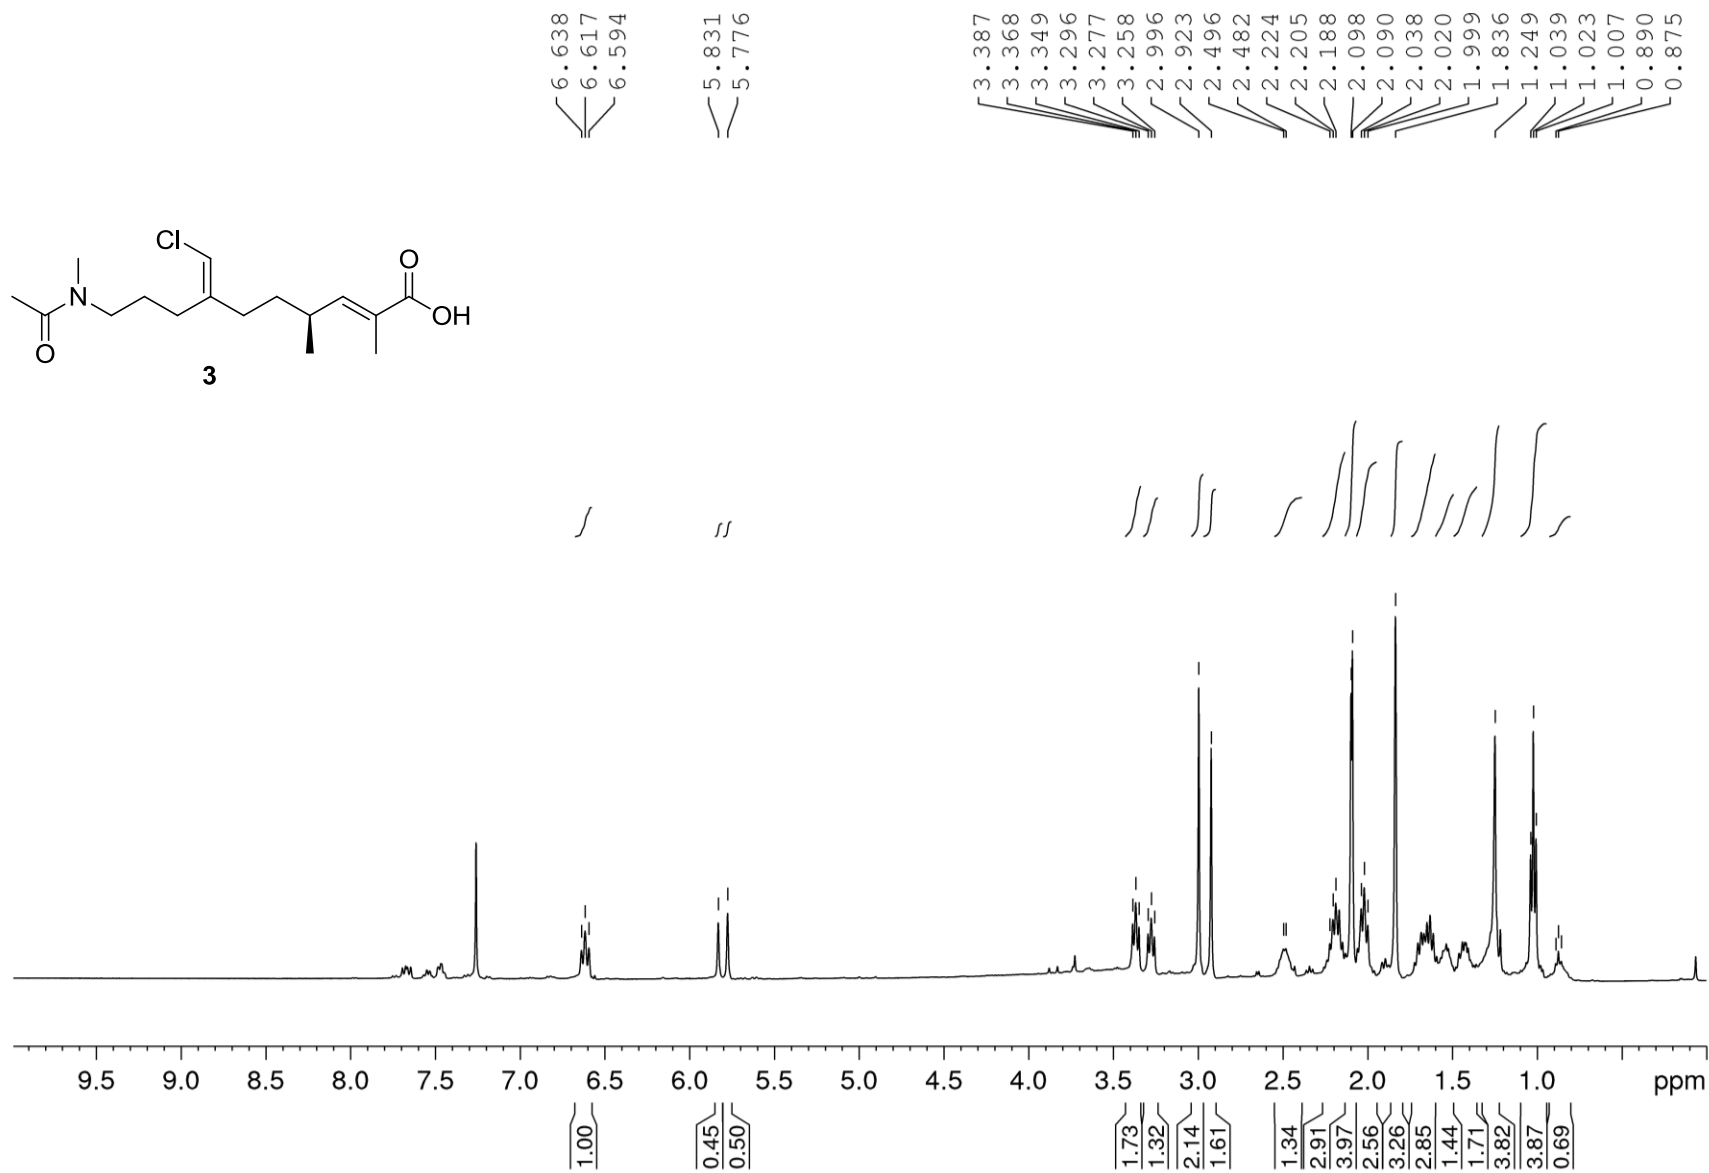

**Figure S45.** <sup>1</sup>H NMR spectrum of compound **3** (CDCl<sub>3</sub>, 400 MHz)

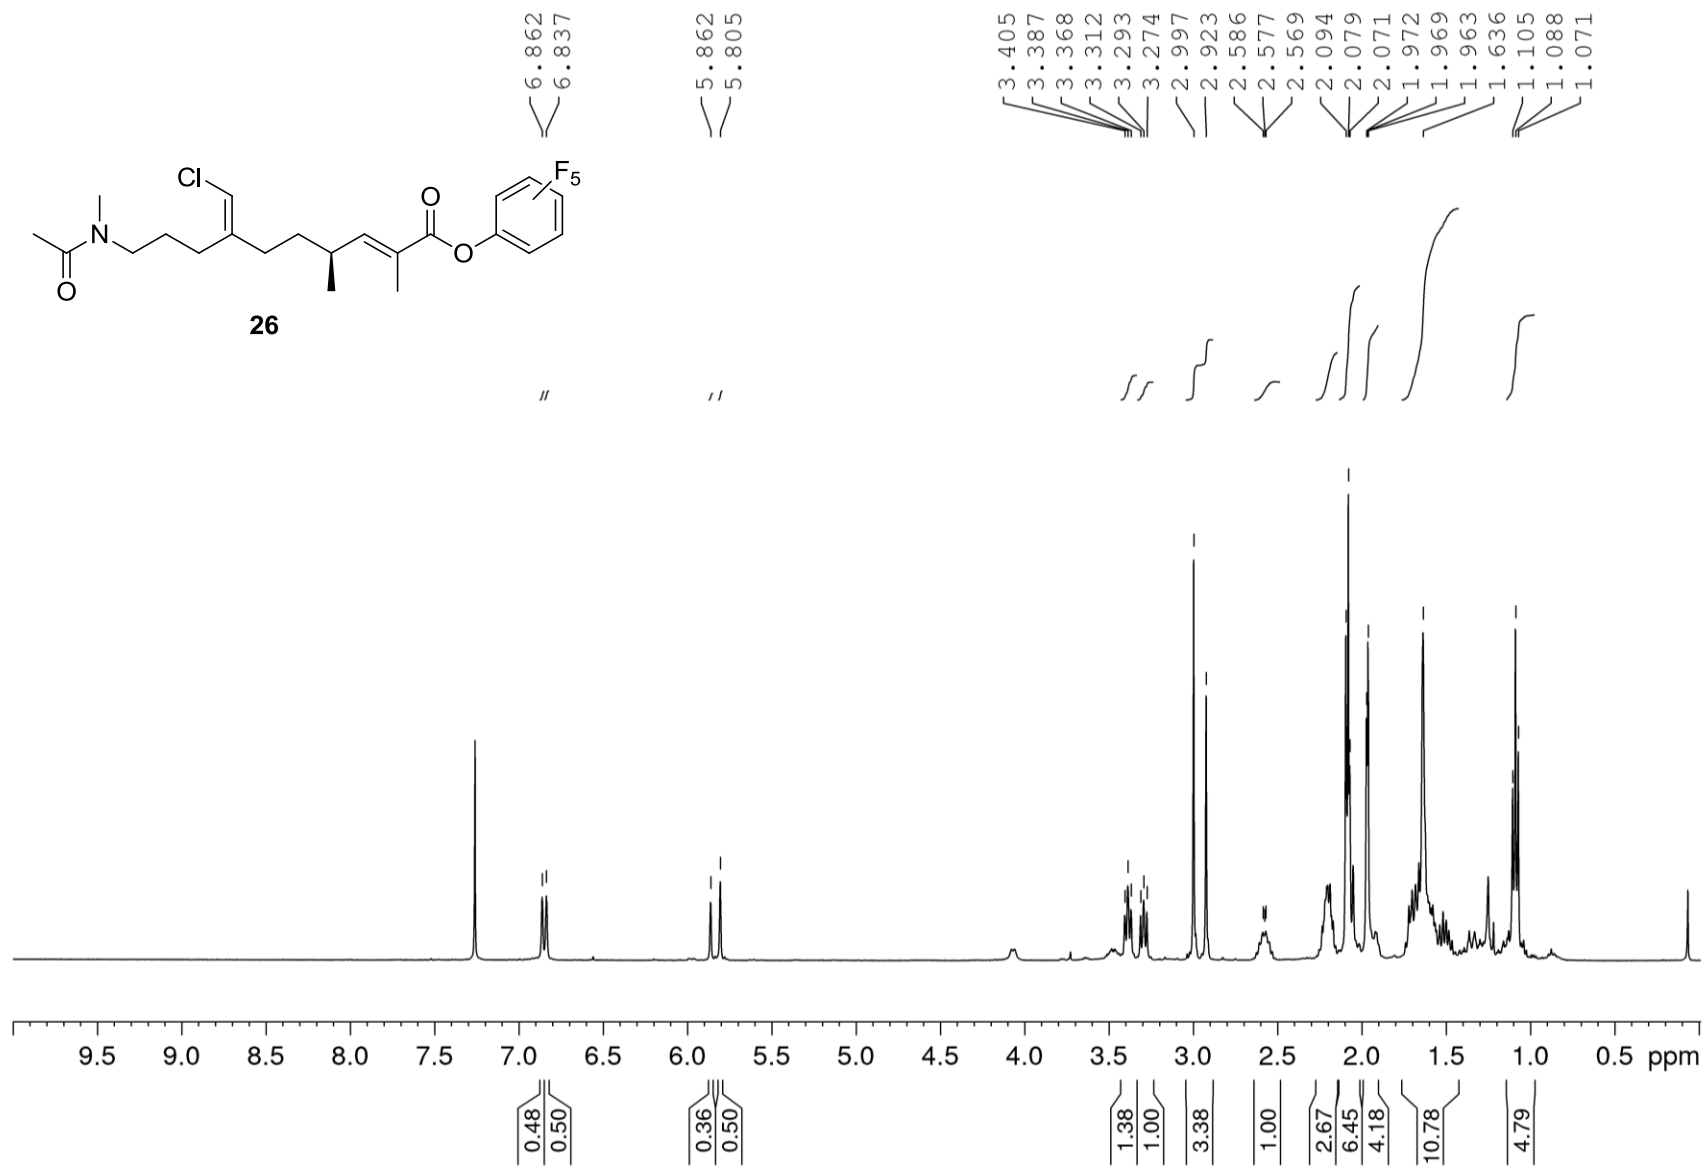

**Figure S46.**  $^1\text{H}$  NMR spectrum of compound **26** ( $\text{CDCl}_3$ , 400 MHz)



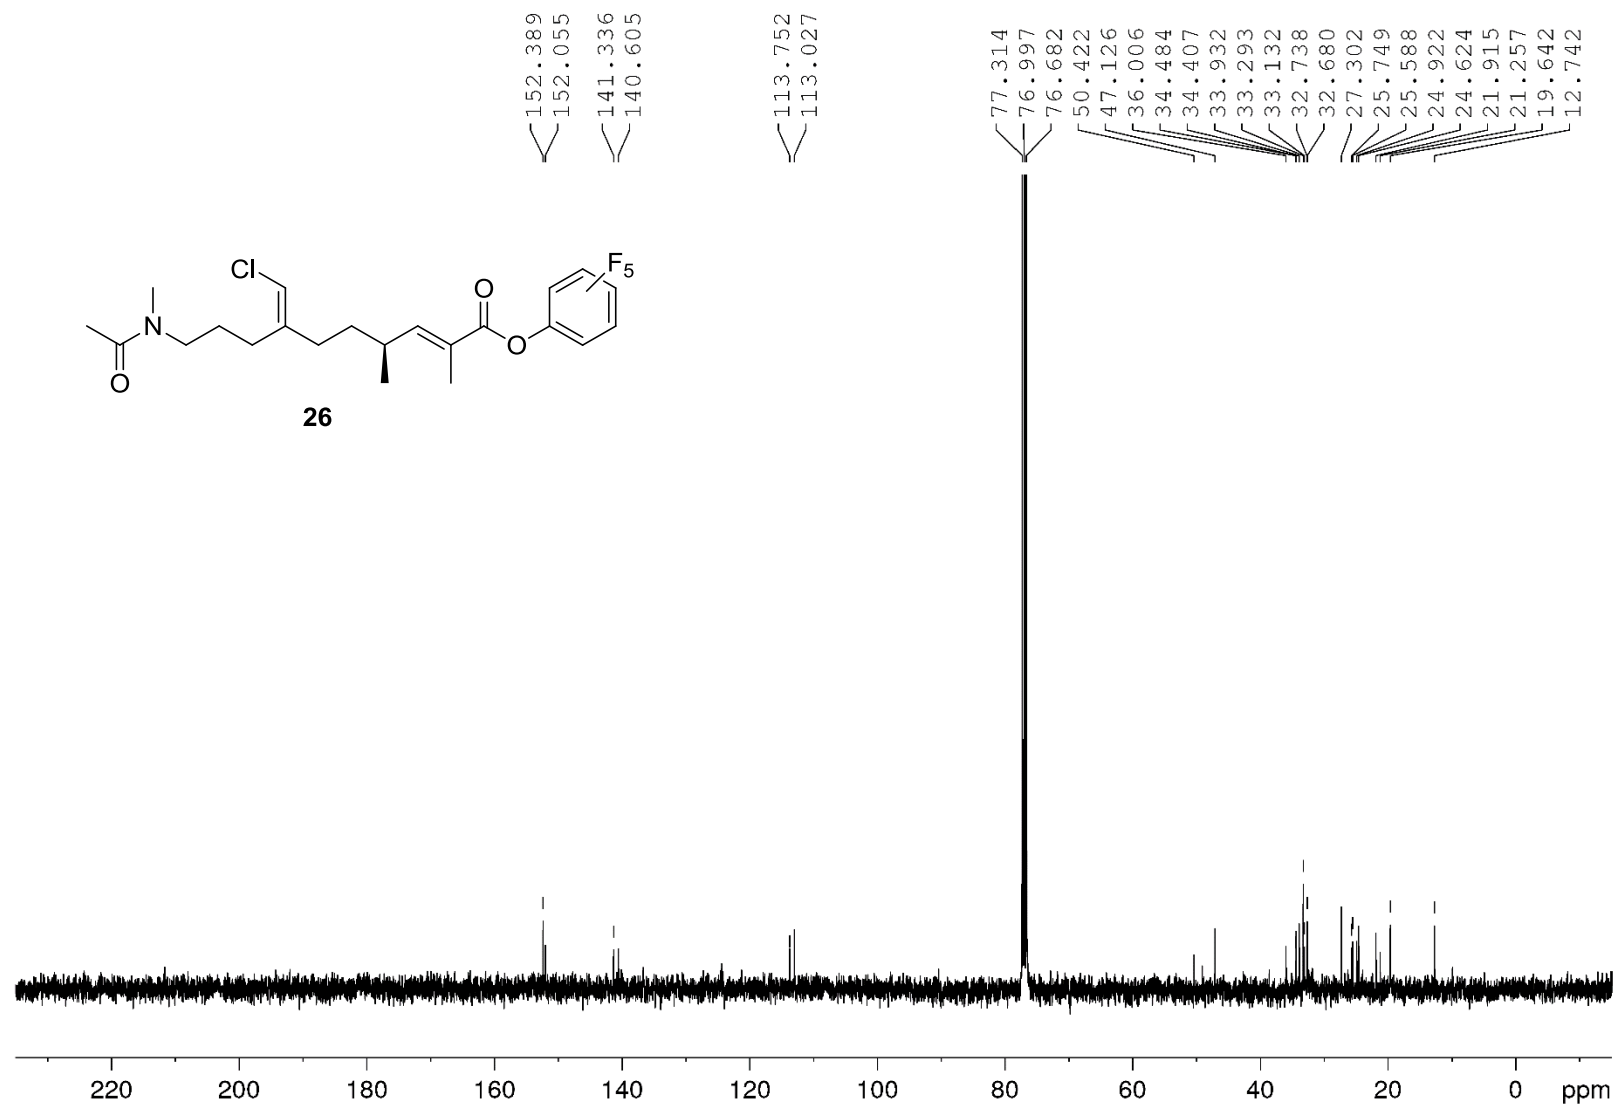

**Figure S47.** <sup>13</sup>C NMR spectrum of compound **26** (CDCl<sub>3</sub>, 100 MHz)

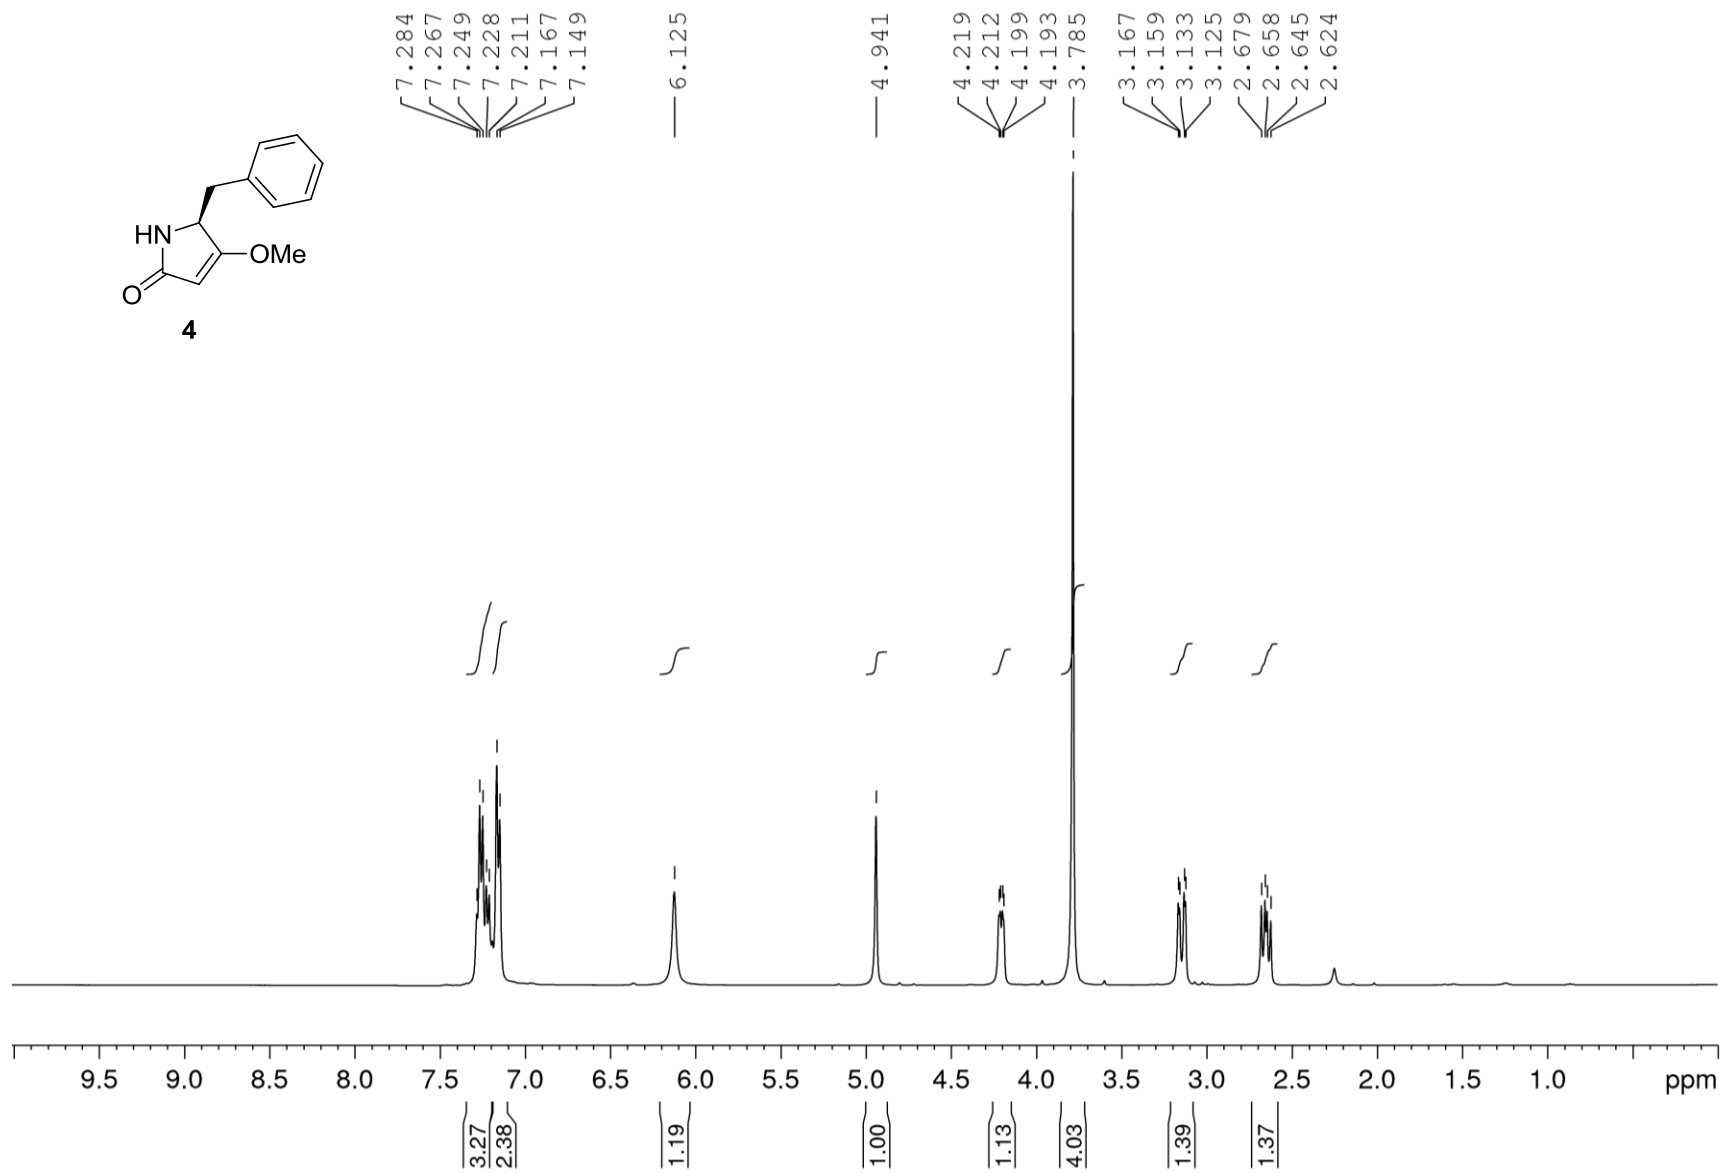

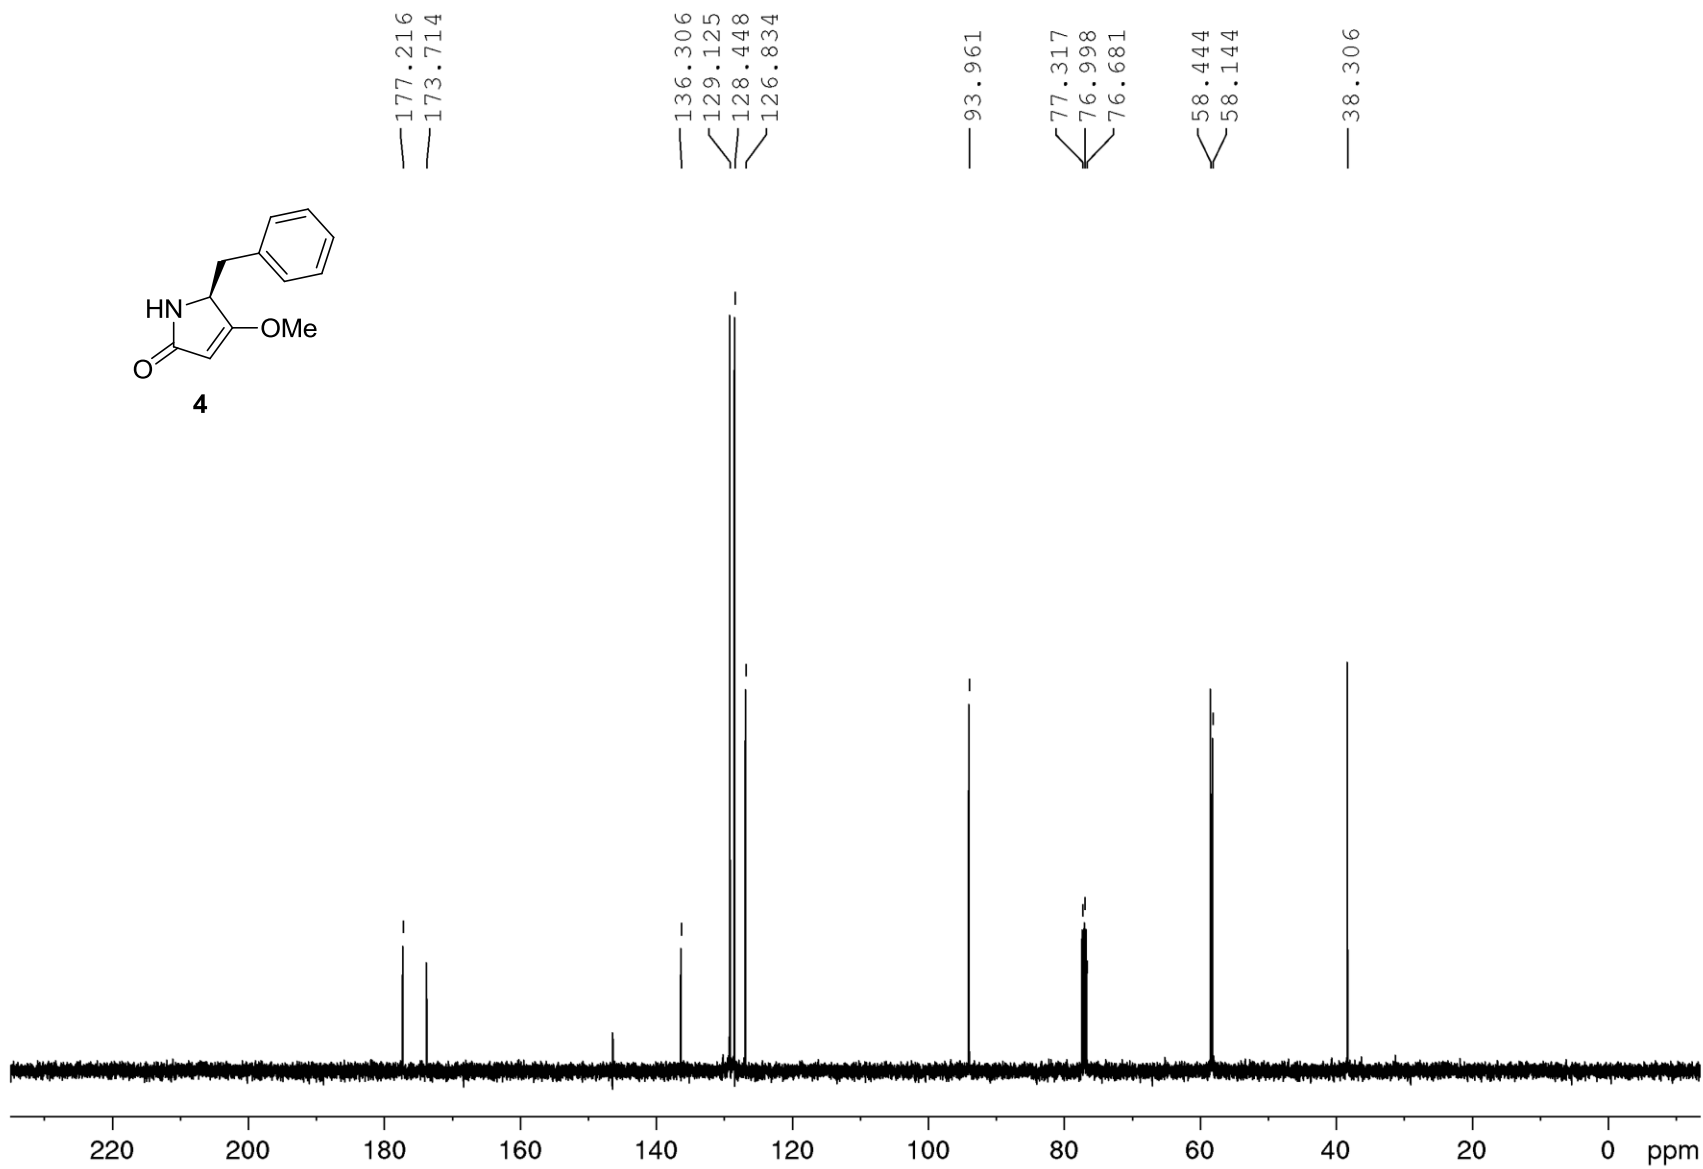

Figure S49. <sup>13</sup>C NMR spectrum of compound 4 (CDCl<sub>3</sub>, 100 MHz)

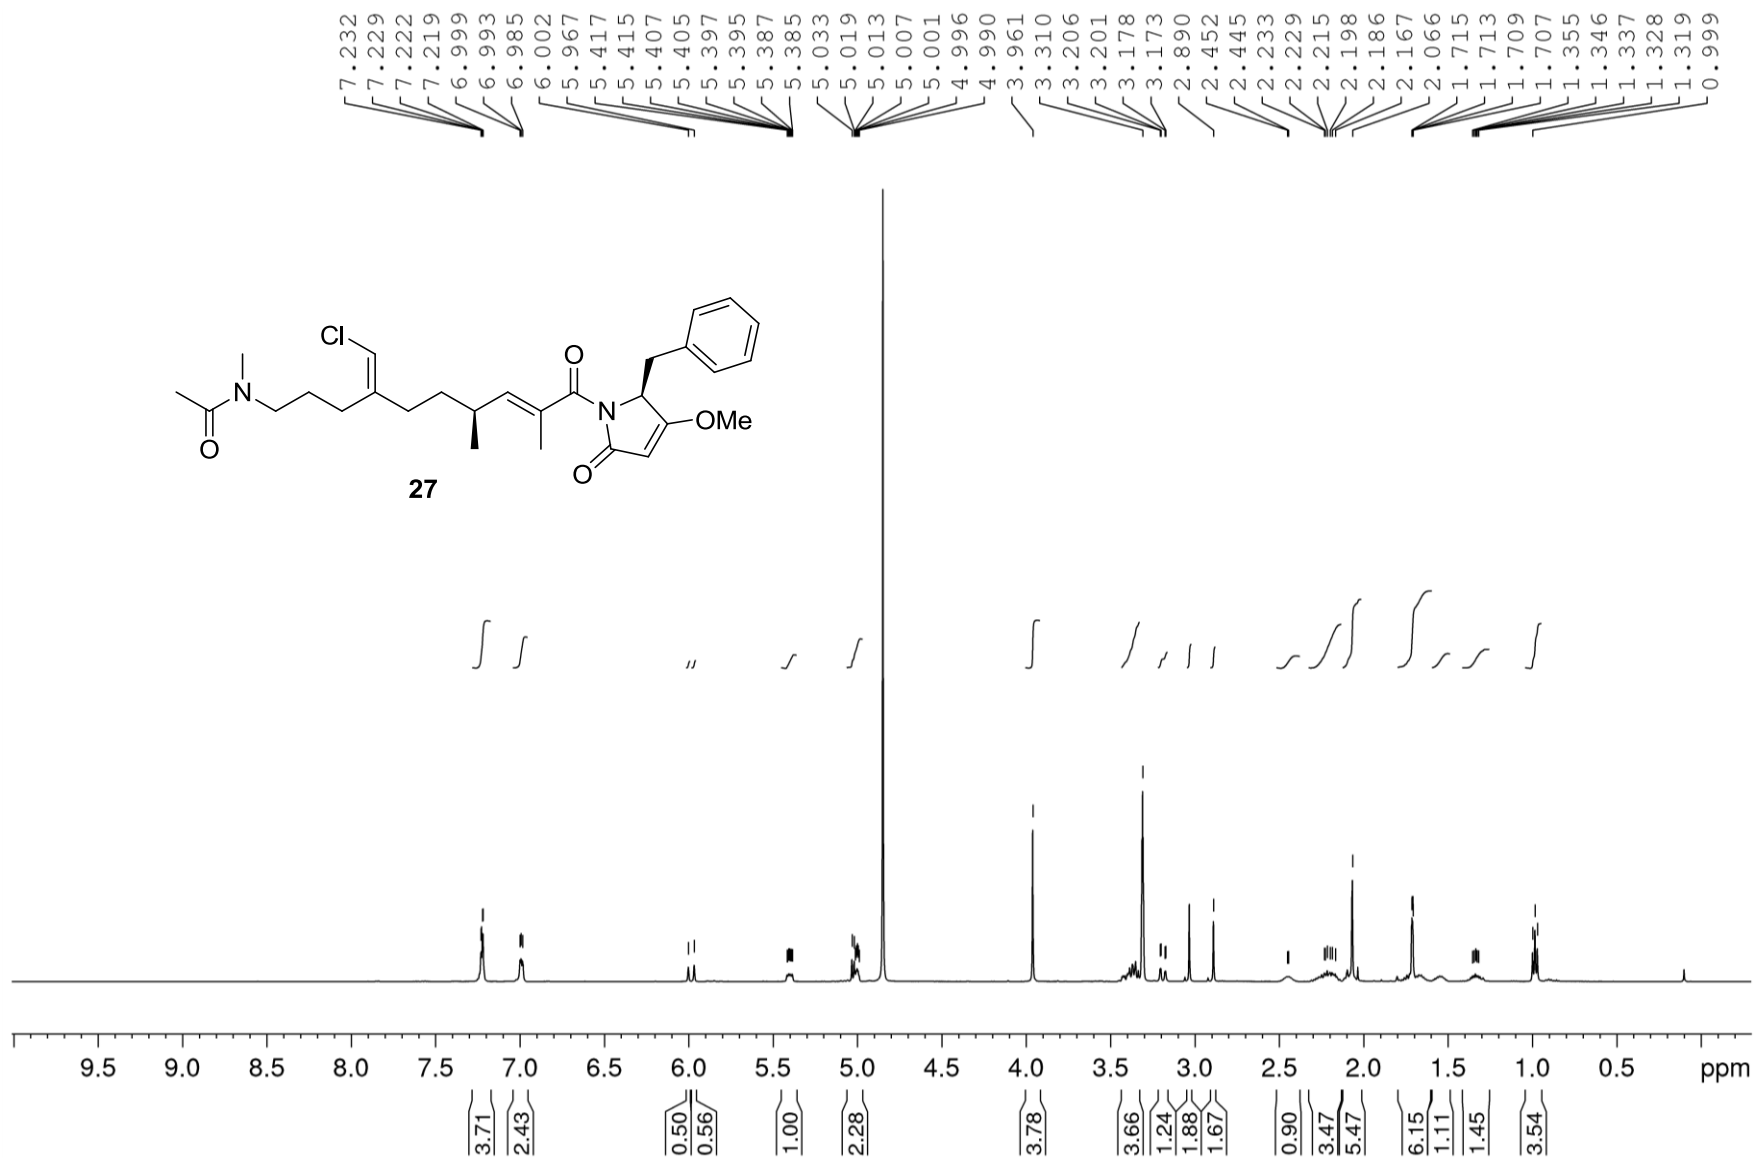

**Figure S50.** <sup>1</sup>H NMR spectrum of compound **27** (CD<sub>3</sub>OD, 500 MHz)

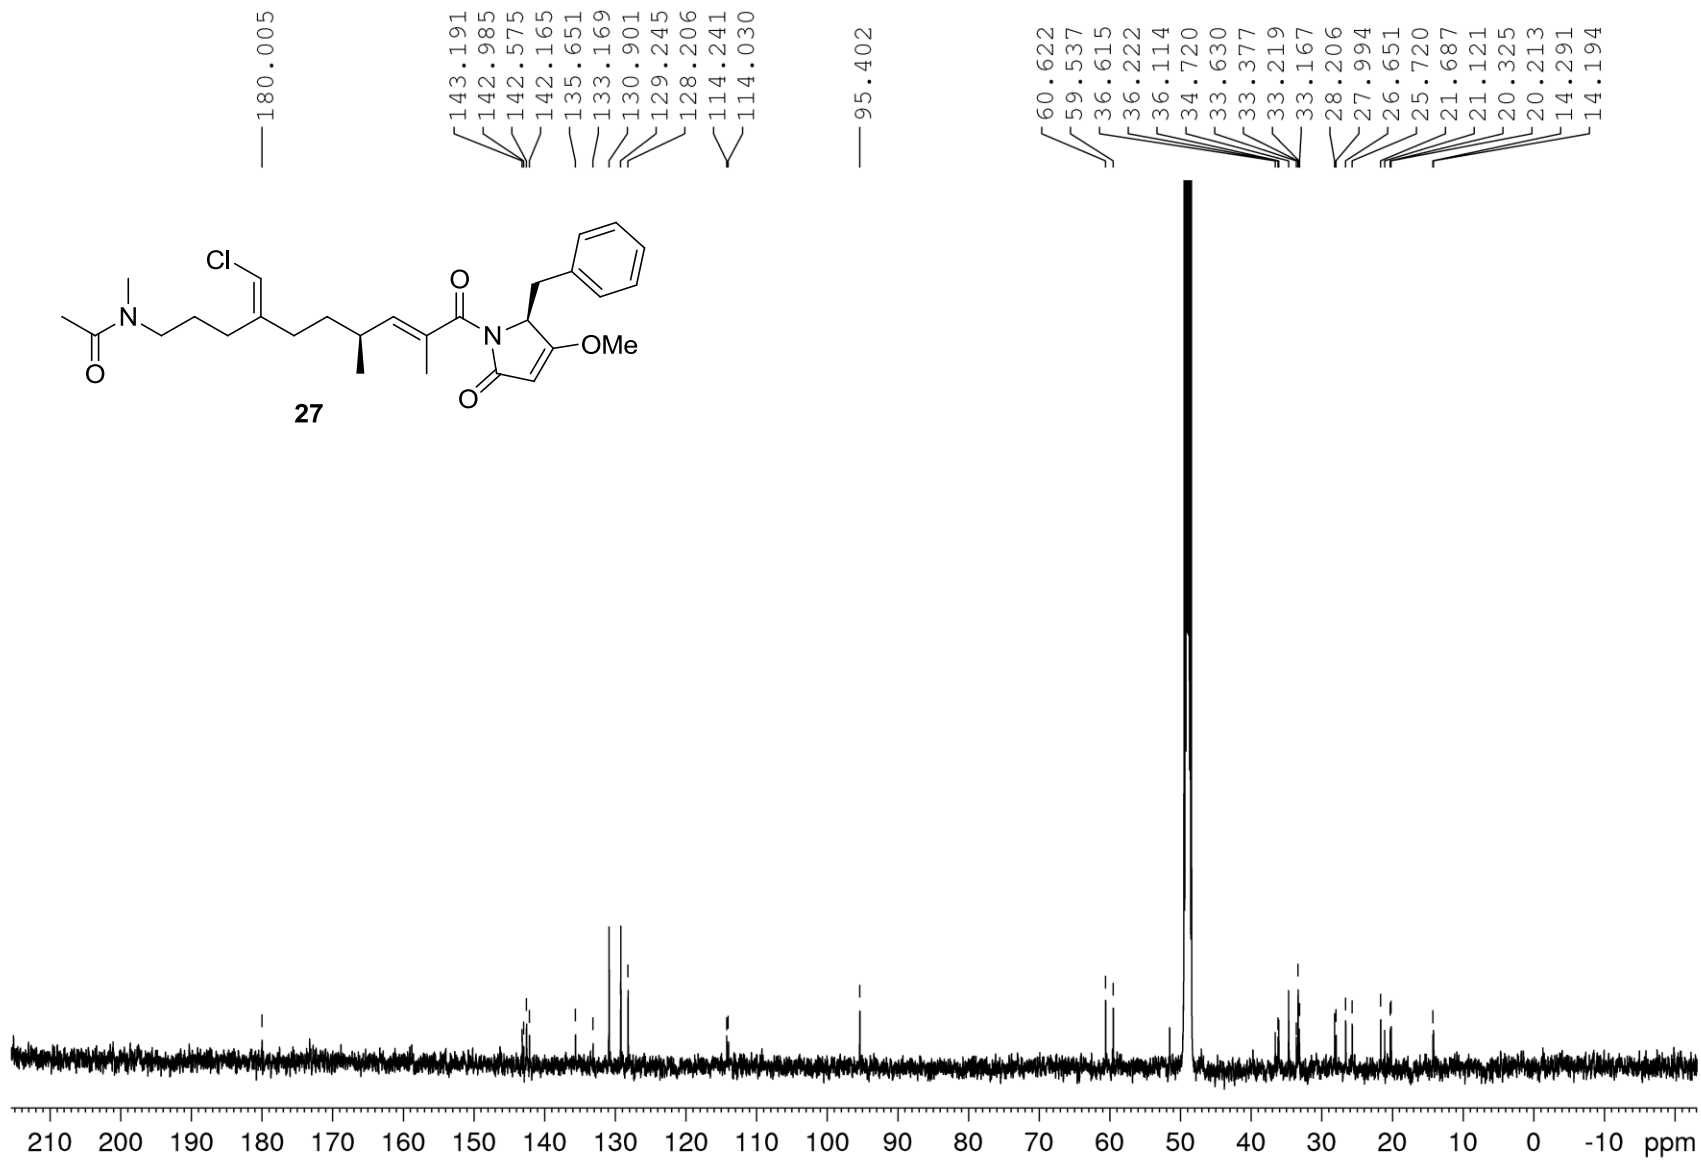

**Figure S51.**  $^{13}\text{C}$  NMR spectrum of compound **27** ( $\text{CD}_3\text{OD}$ , 125 MHz)

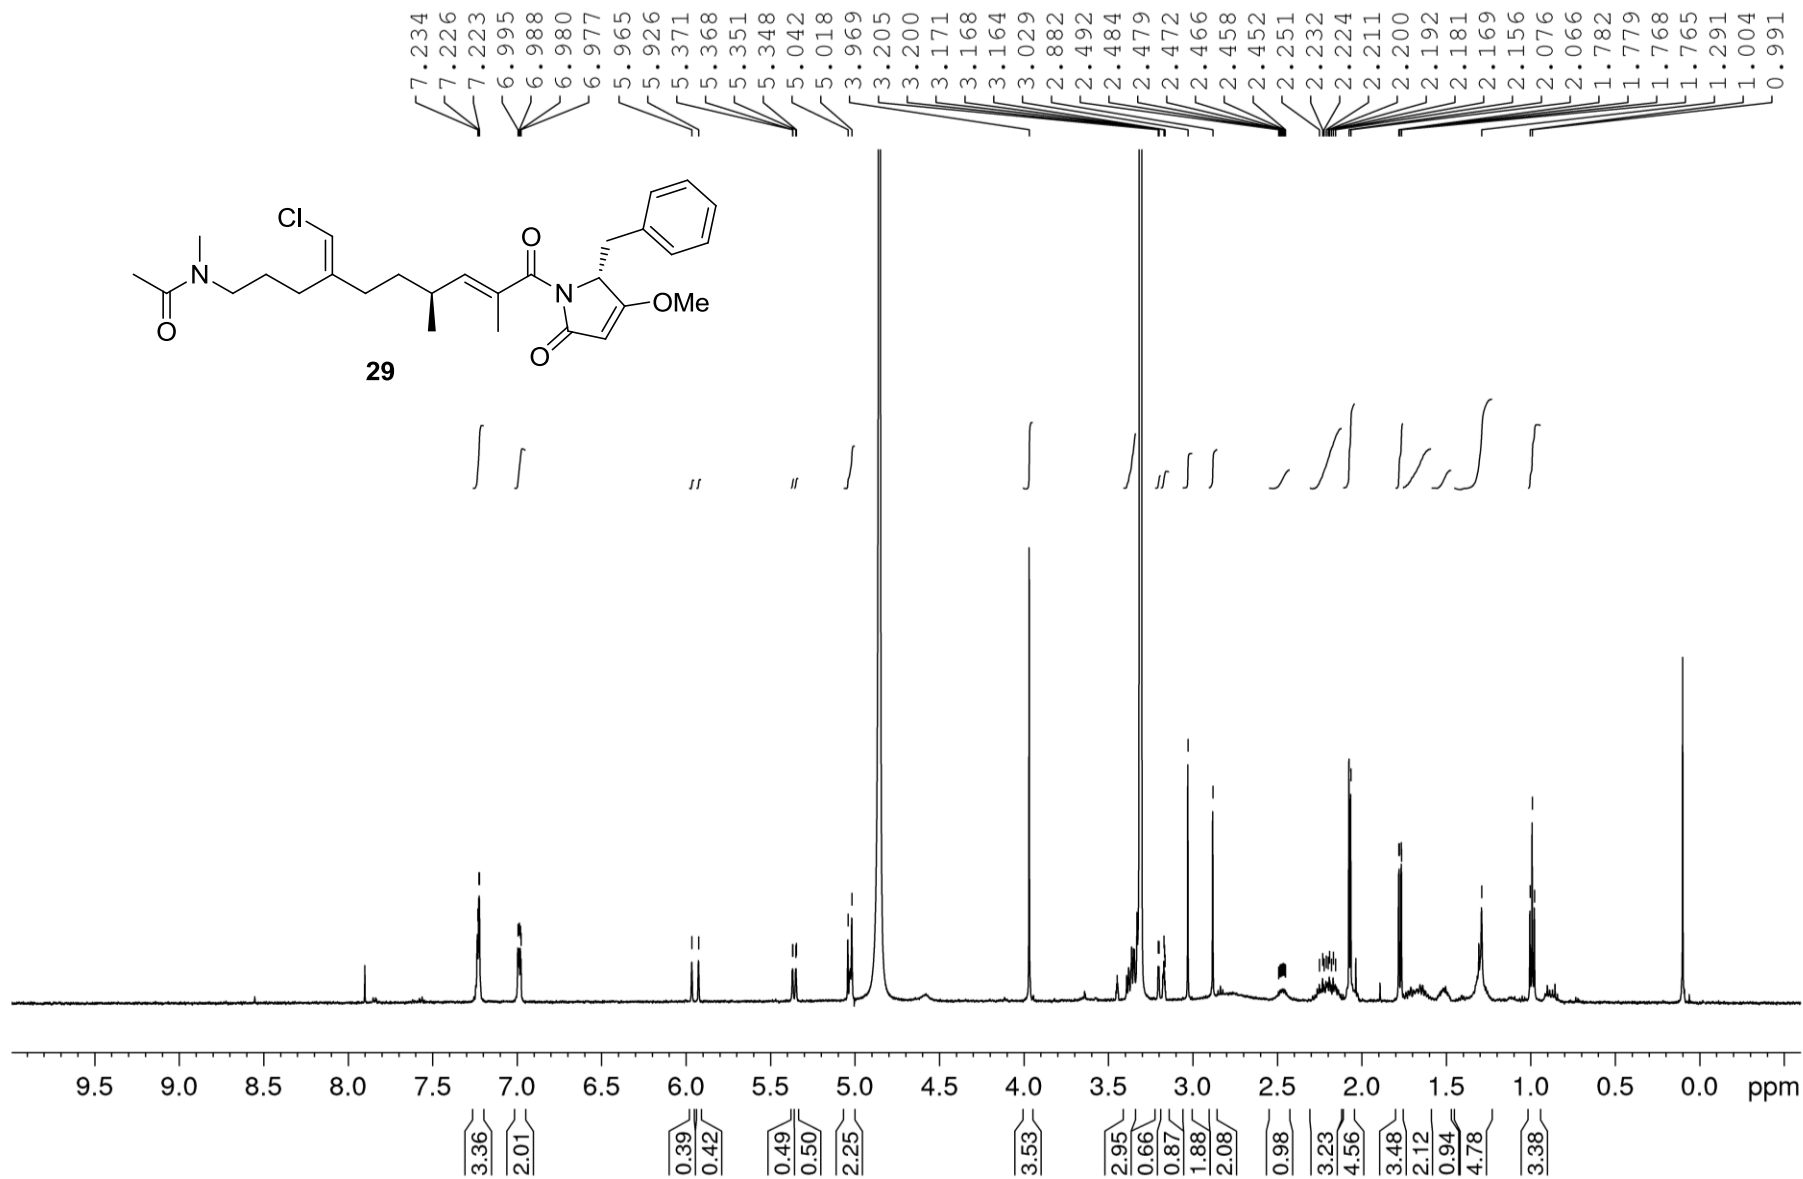

**Figure S52.** <sup>1</sup>H NMR spectrum of compound **29** (CD<sub>3</sub>OD, 700 MHz)

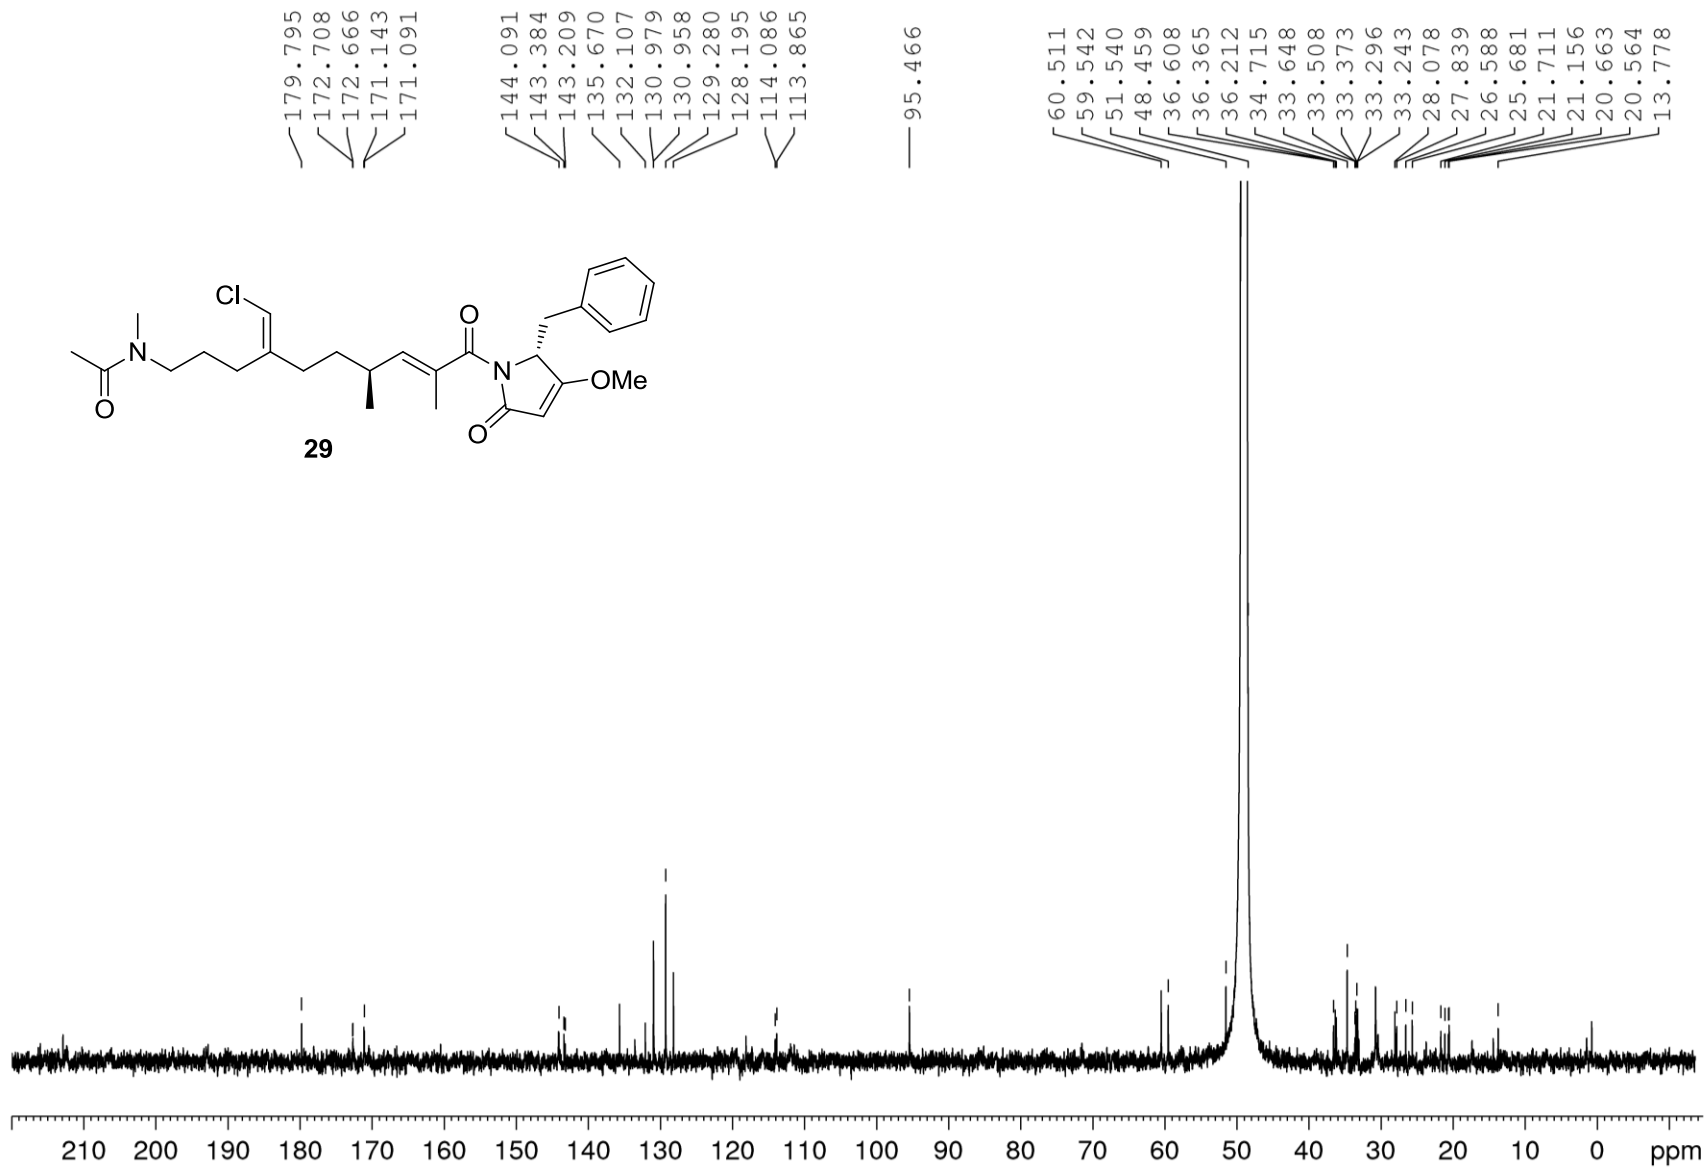

**Figure S53.** <sup>13</sup>C NMR spectrum of compound **29** (CD<sub>3</sub>OD, 175 MHz)

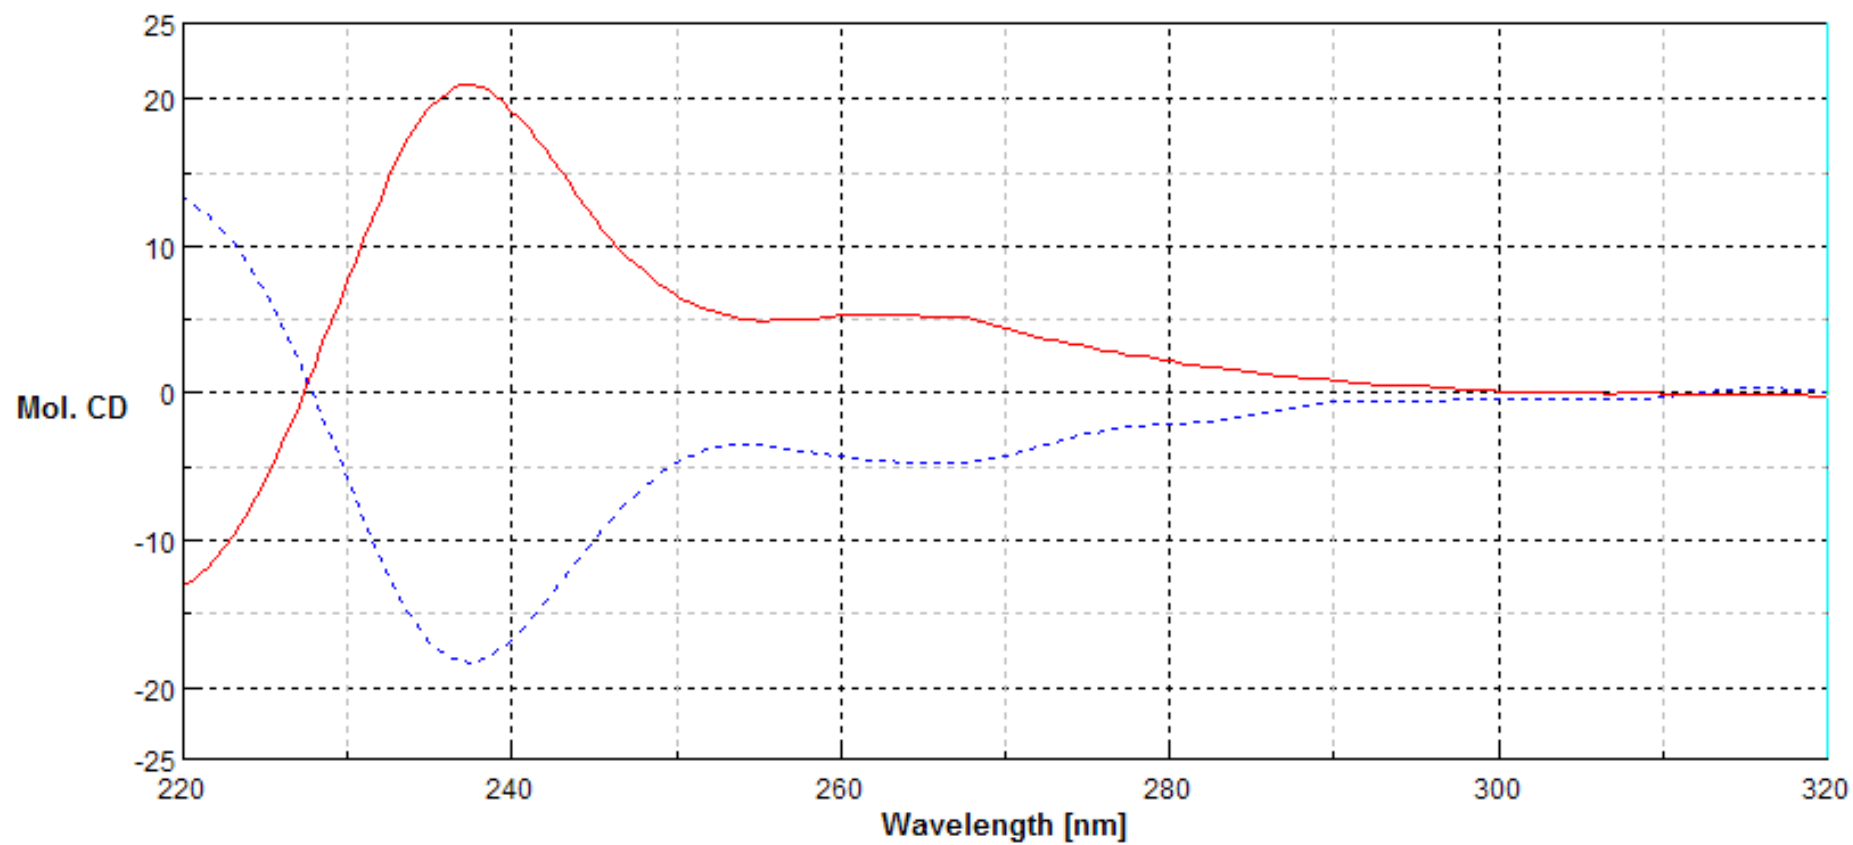

**Figure S54.** ECD spectra of natural smenamides A (solid red line) and *ent*-smenamides A (**29**) (dashed blue line).
